# Supplementary material for: Polymethoxy-1-Alkenes Screening of Chlorella and Spirulina Food Supplements Coupled with In Vivo Toxicity Studies
Source: MDPI journal article supplement (doi:10.3390/toxins12020111), 2020-02-10

## **Mass Spectrometry Details**

### **In-house analysis Thermo Fisher LCQ Deca.**

ESI source:

Ionization mode: positive

Sheath gas flow rate: 35

Sweep gas flow rate: 0

Spray voltage: 4.5kV

Capillary temperature: 250°C

Capillary voltage: 3V

Tube lens offset: -30V

Injection control:

AGC settings:

FullMS Target: 5e7

Ion optics:

Multipole 1 Offset: -1.25V

Lens voltage: -16V

Multipole 2 Offset: -11V

Multipole RF Amplitude: 400V

Enhance Lens: -68V

### **NMSF Atmospheric Solids Analysis Probe (ASAP)**

APCI on a Waters Xevo G2-S instrument.

ASAP analyses: Initial characterisation of samples was made by atmospheric pressure chemical ionisation (APCI) mass spectrometry via an atmospheric solids analysis probe (ASAP) on a Waters Xevo G2-S instrument. A small amount of solid sample was transferred to the tip of a glass capillary, which was then placed within the ASAP source and inserted into the instrument. The vaporizer temperature was increased from 50°C to a temperature at which ions were observed and acquired and the discharge current was 4  $\mu$ A . Data was processed using vendor MassLynx software.

Please also see the header of each spectrum.

CH1 #1-50 RT: 0.01-0.75 AV: 50 NL: 2.38E5

T: + p ESI ms [150.00-1000.00]

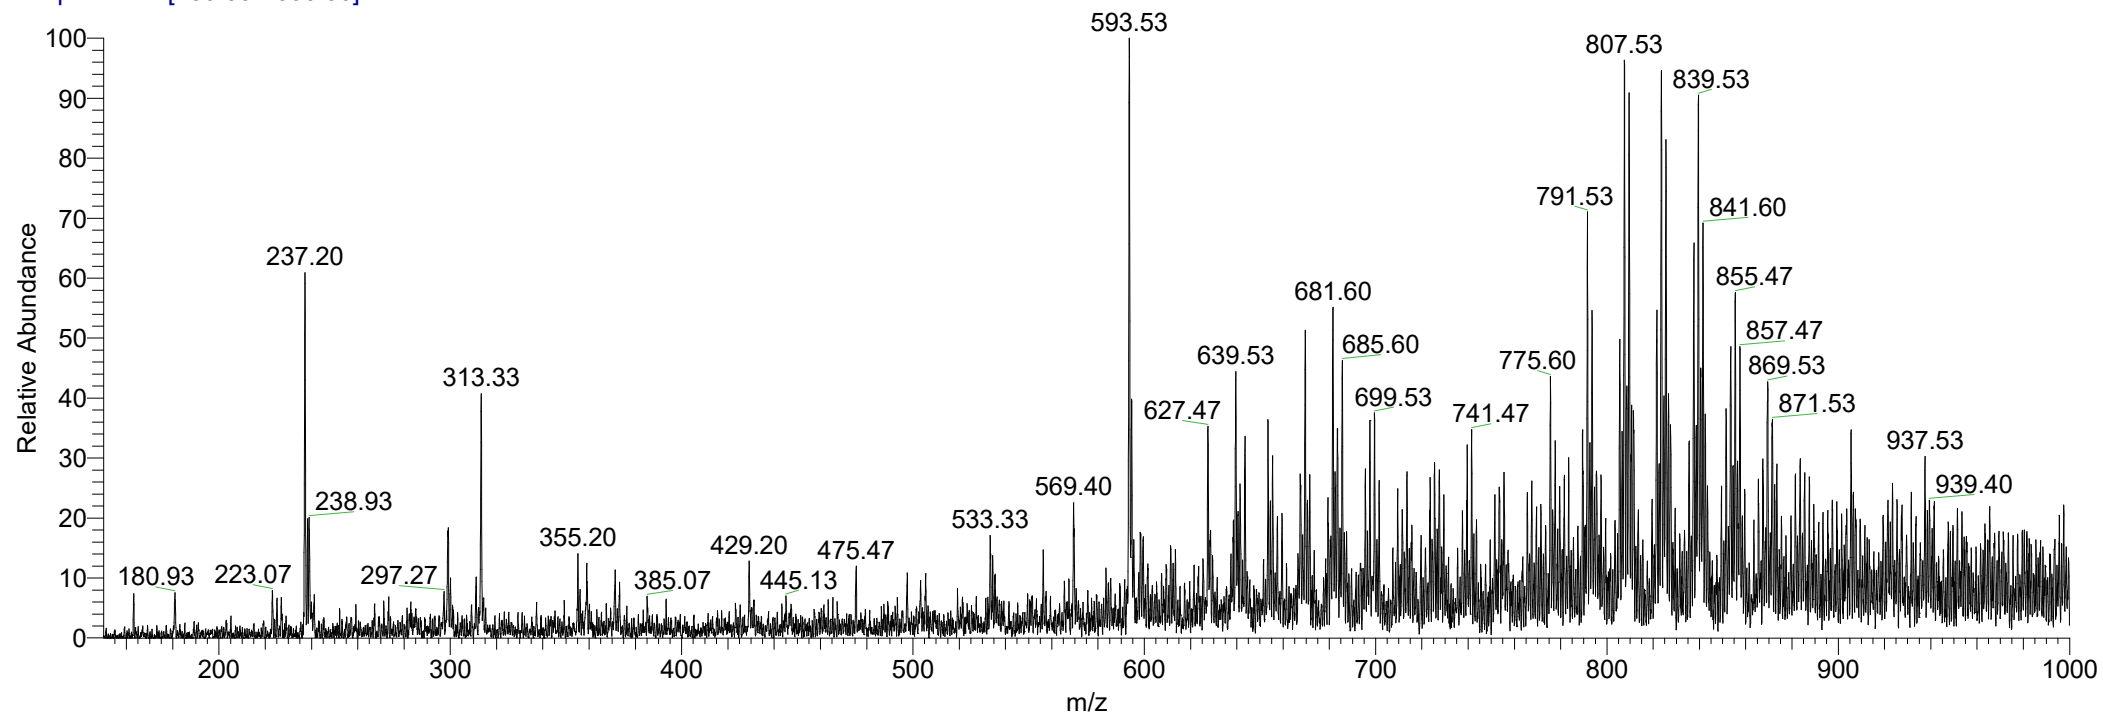

CH1 #1-50 RT: 0.01-0.75 AV: 50 NL: 2.38E5

T: + p ESI ms [150.00-1000.00]

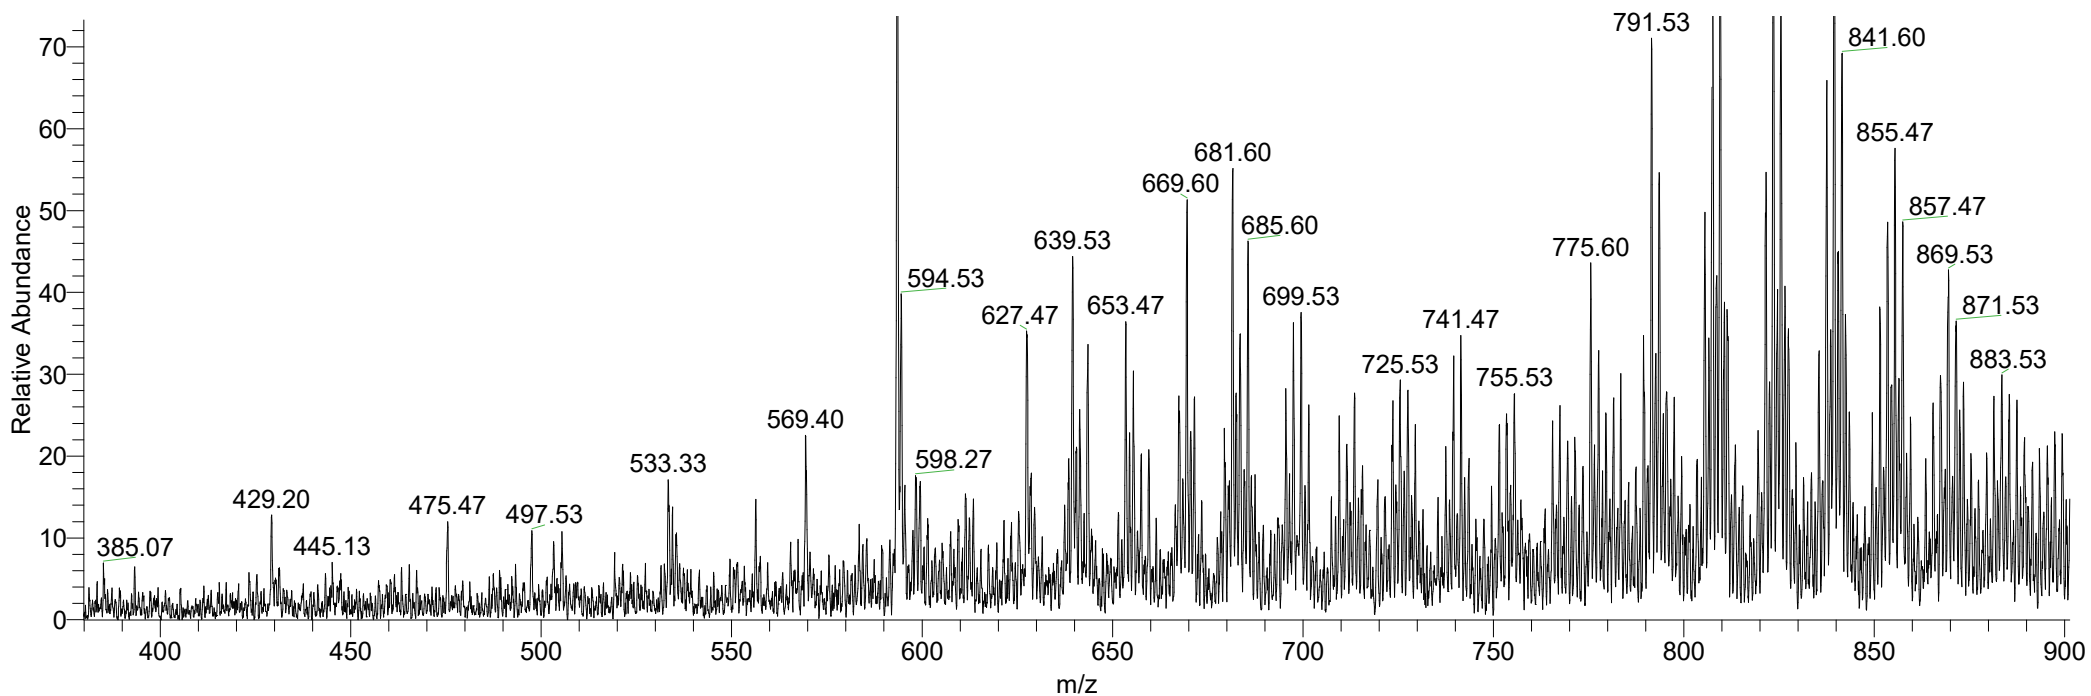

CH2 #1-50 RT: 0.00-0.74 AV: 50 NL: 1.08E6

T: + p ESI ms [150.00-1000.00]

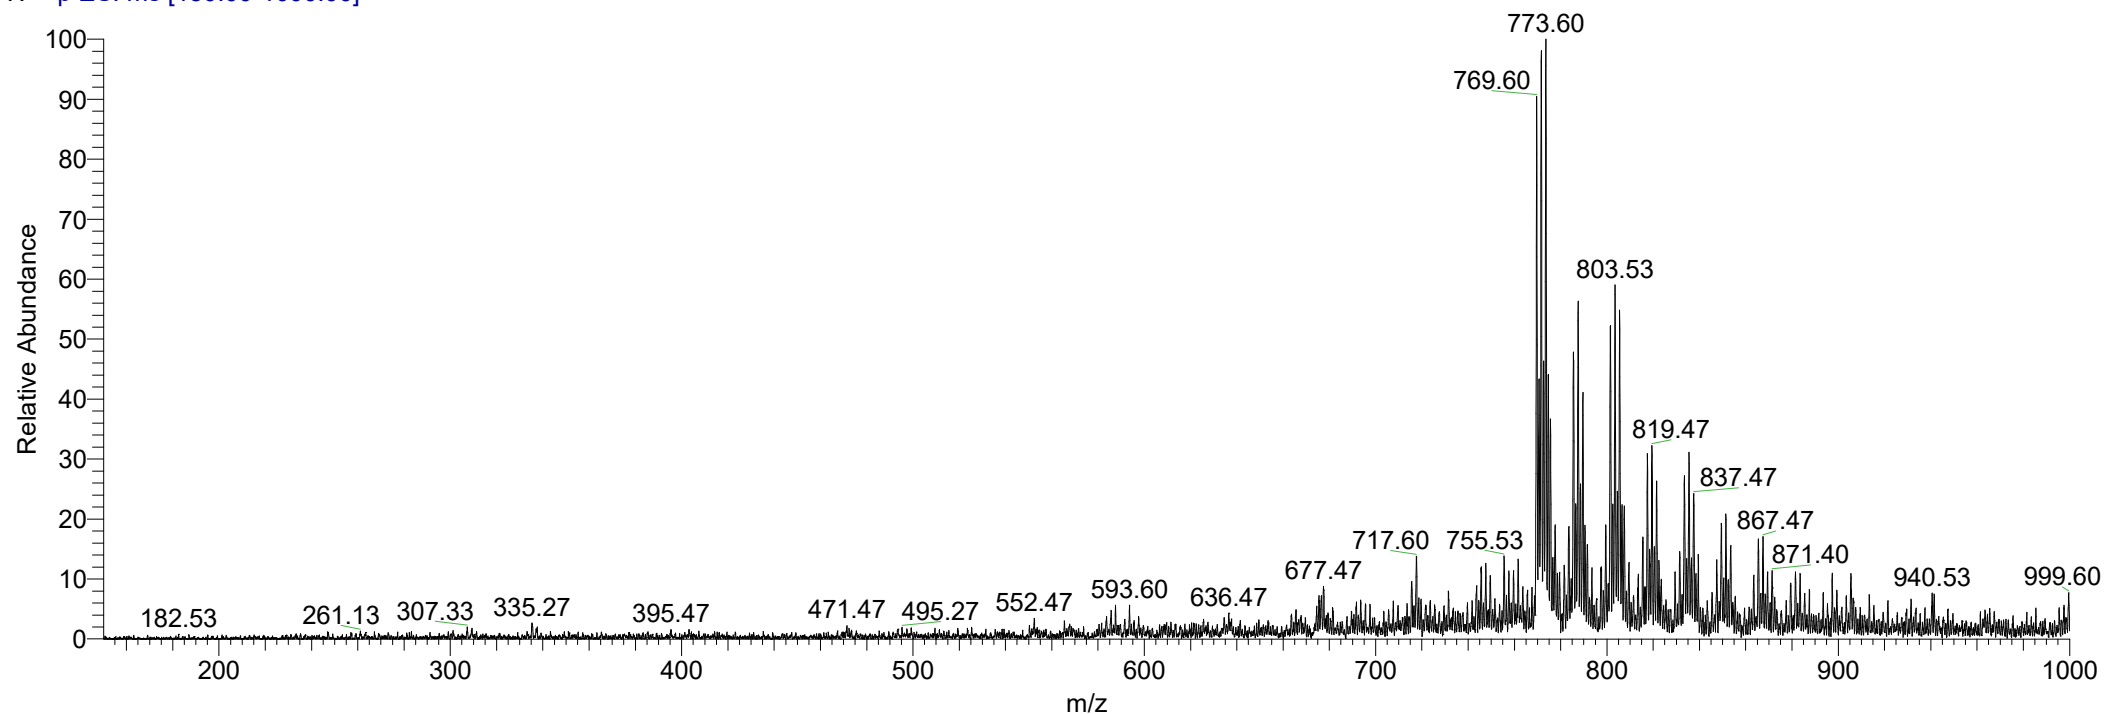

CH2 #1-50 RT: 0.00-0.74 AV: 50 NL: 1.08E6

T: + p ESI ms [150.00-1000.00]

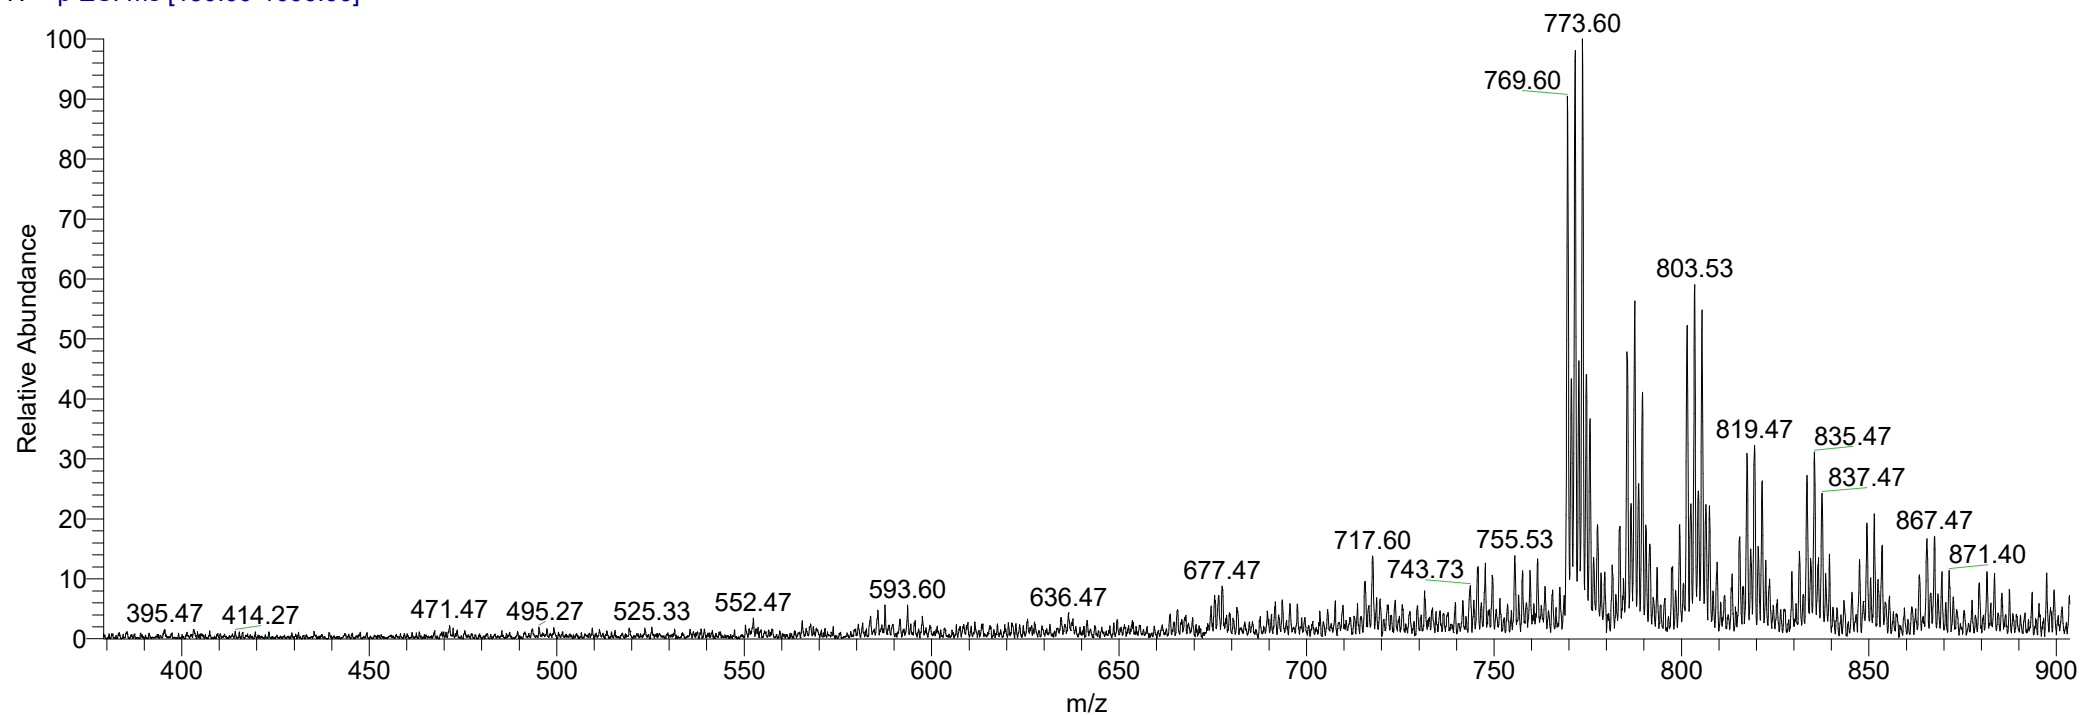

CH3 #1-50 RT: 0.01-0.74 AV: 50 NL: 8.70E5

T: + p ESI ms [150.00-1000.00]

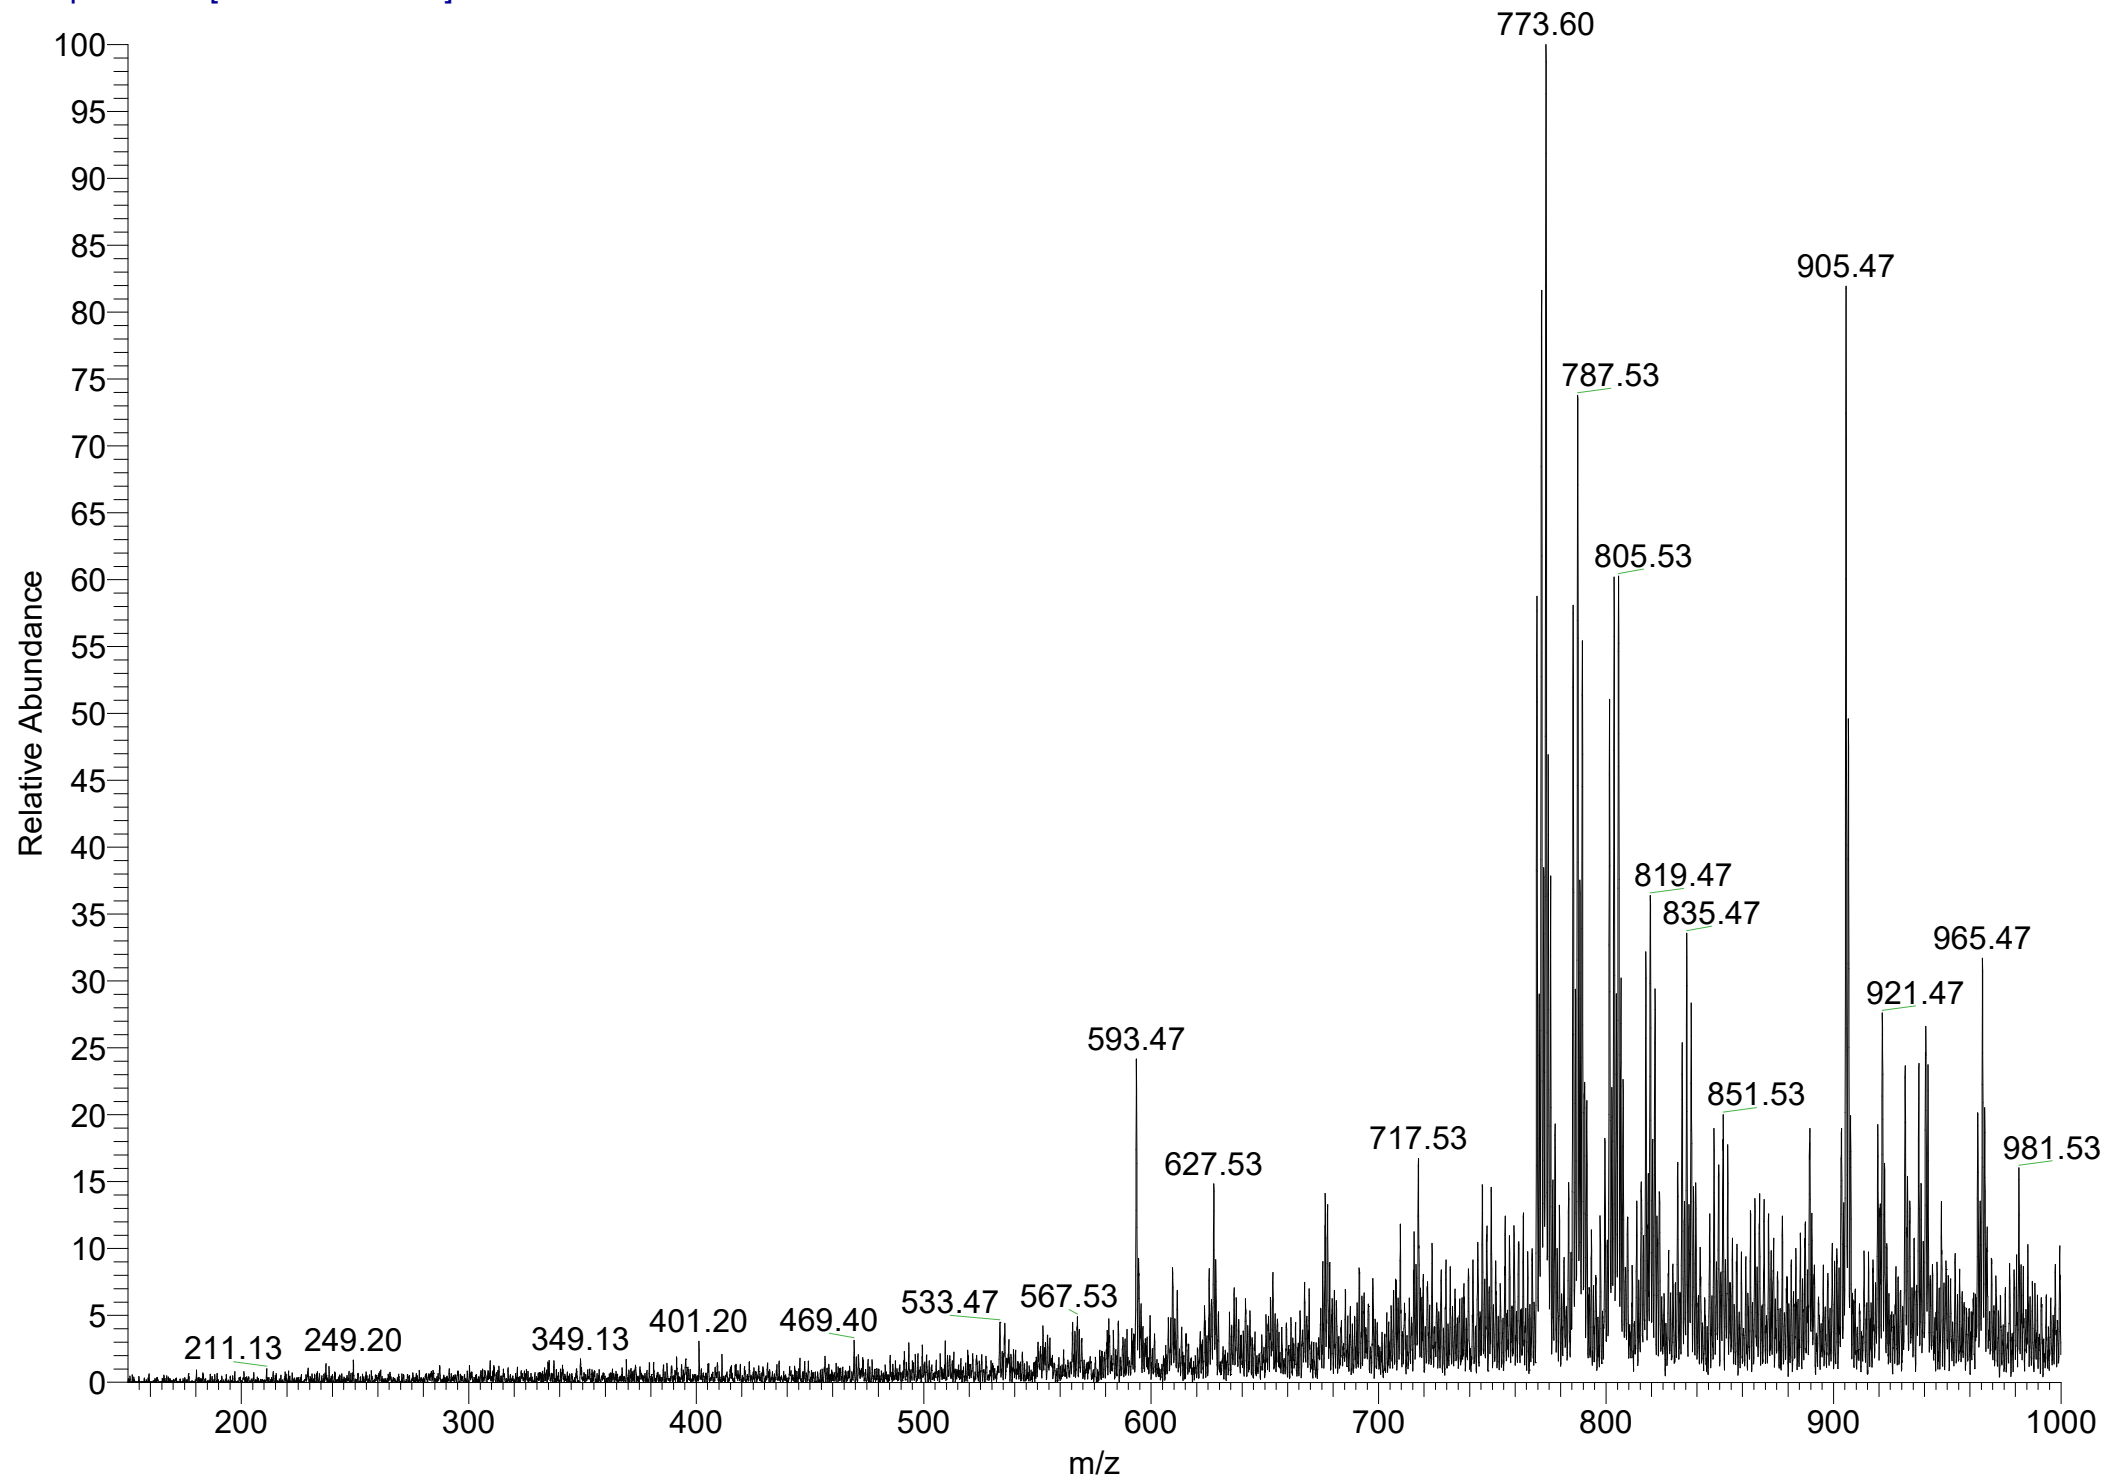

CH3 #1-50 RT: 0.01-0.74 AV: 50 NL: 8.70E5

T: + p ESI ms [150.00-1000.00]

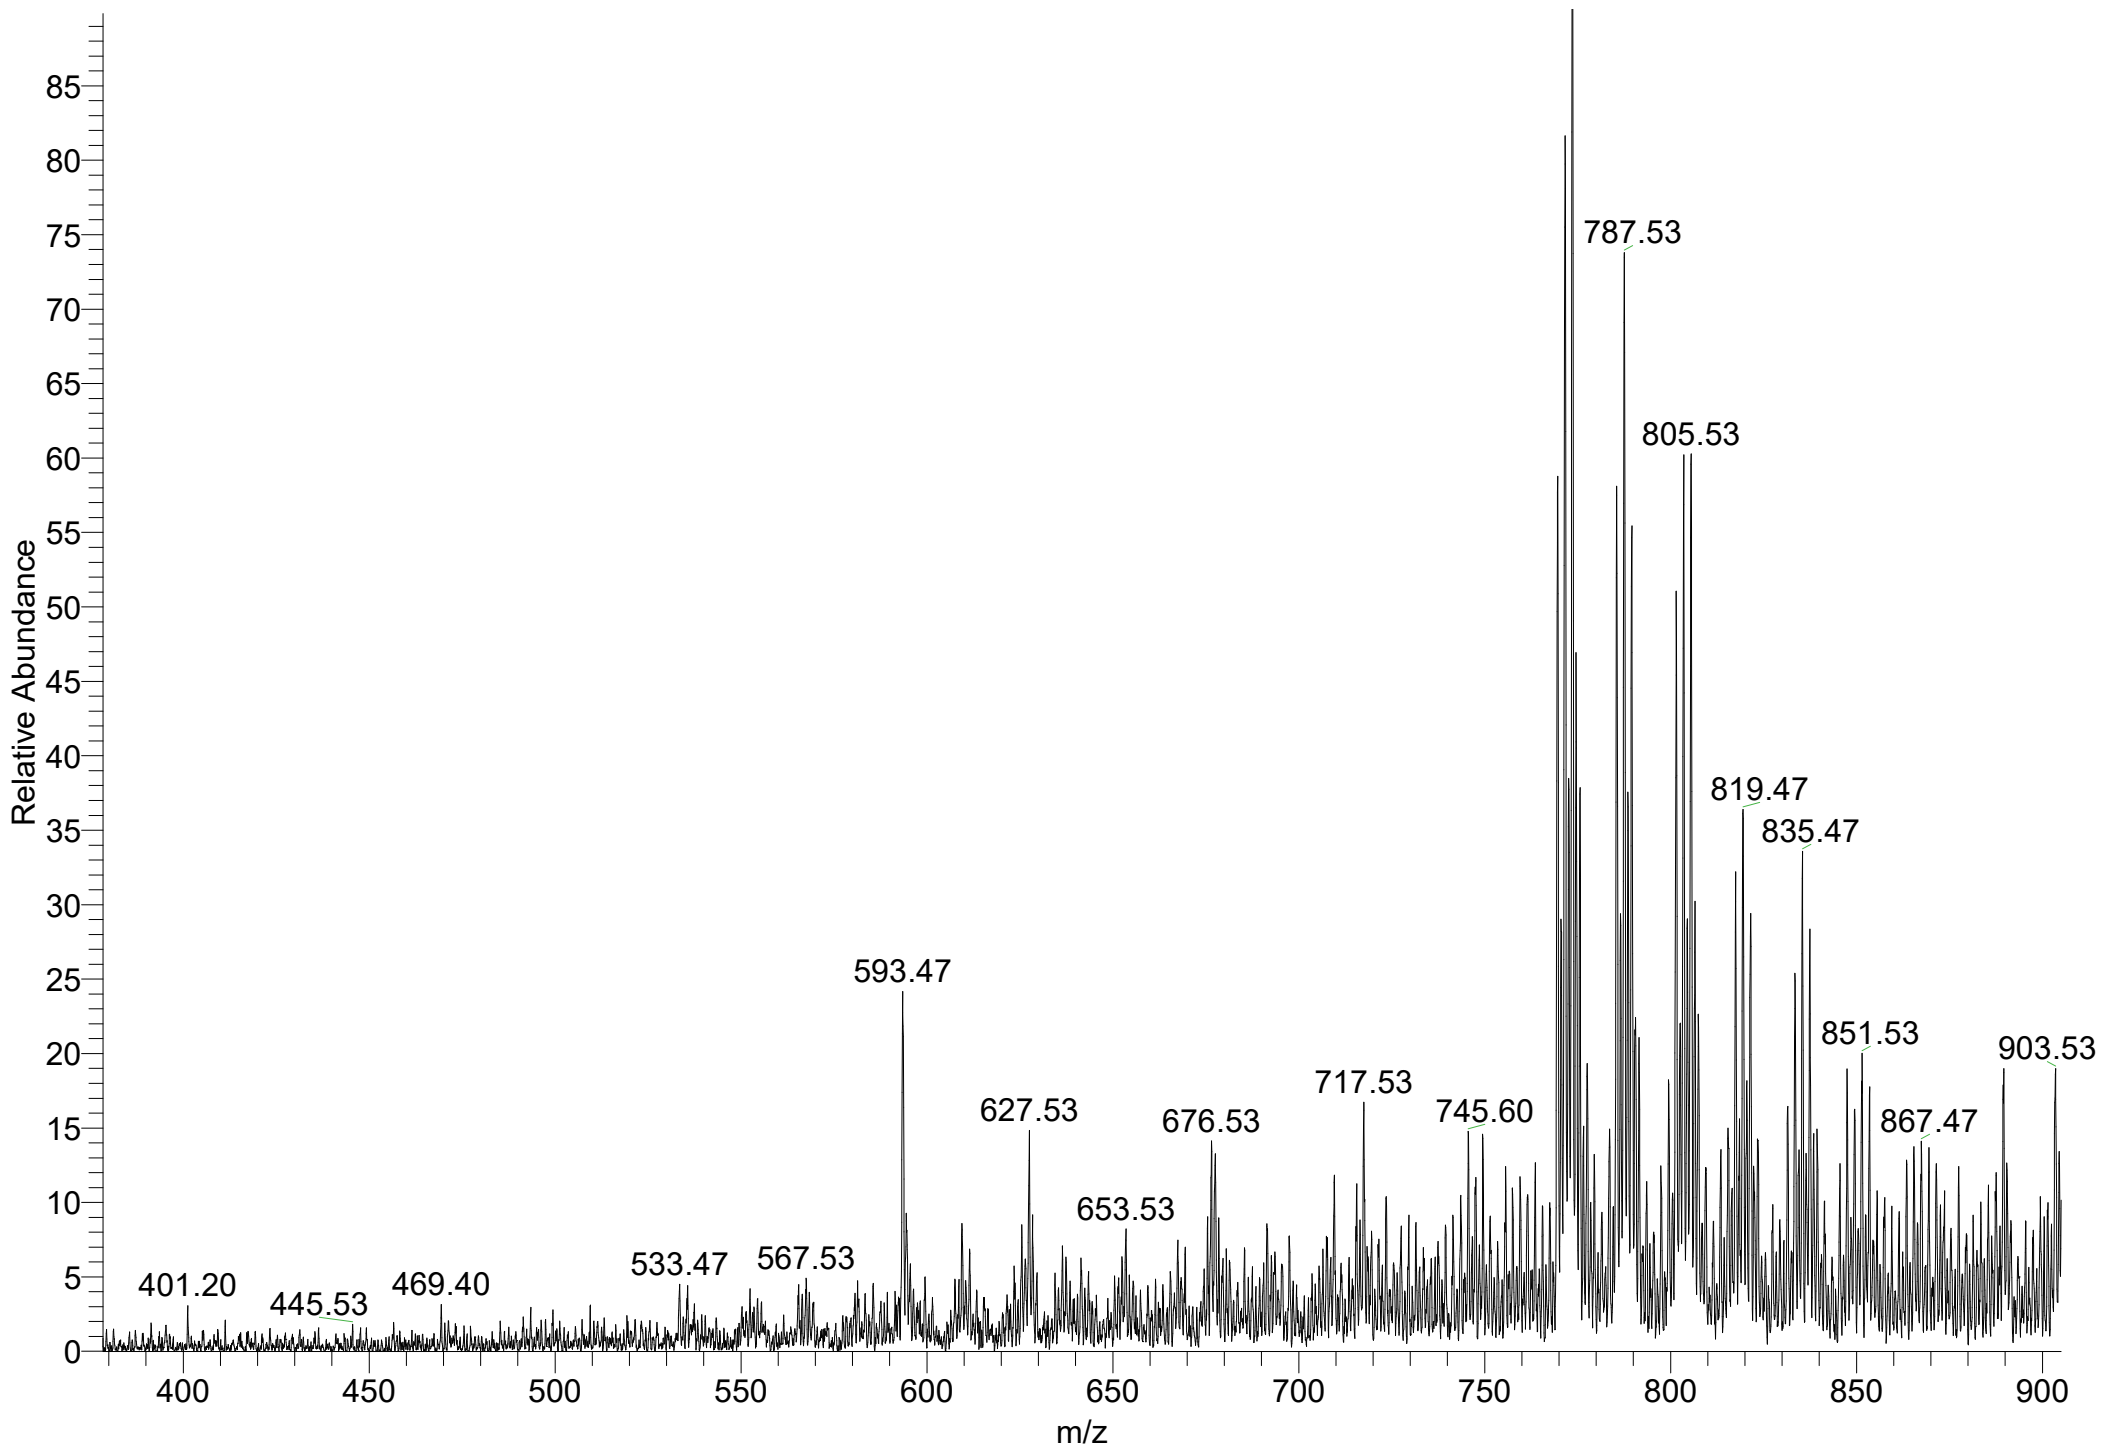

CH4 #1-50 RT: 0.00-0.74 AV: 50 NL: 7.04E5

T: + p ESI ms [150.00-1000.00]

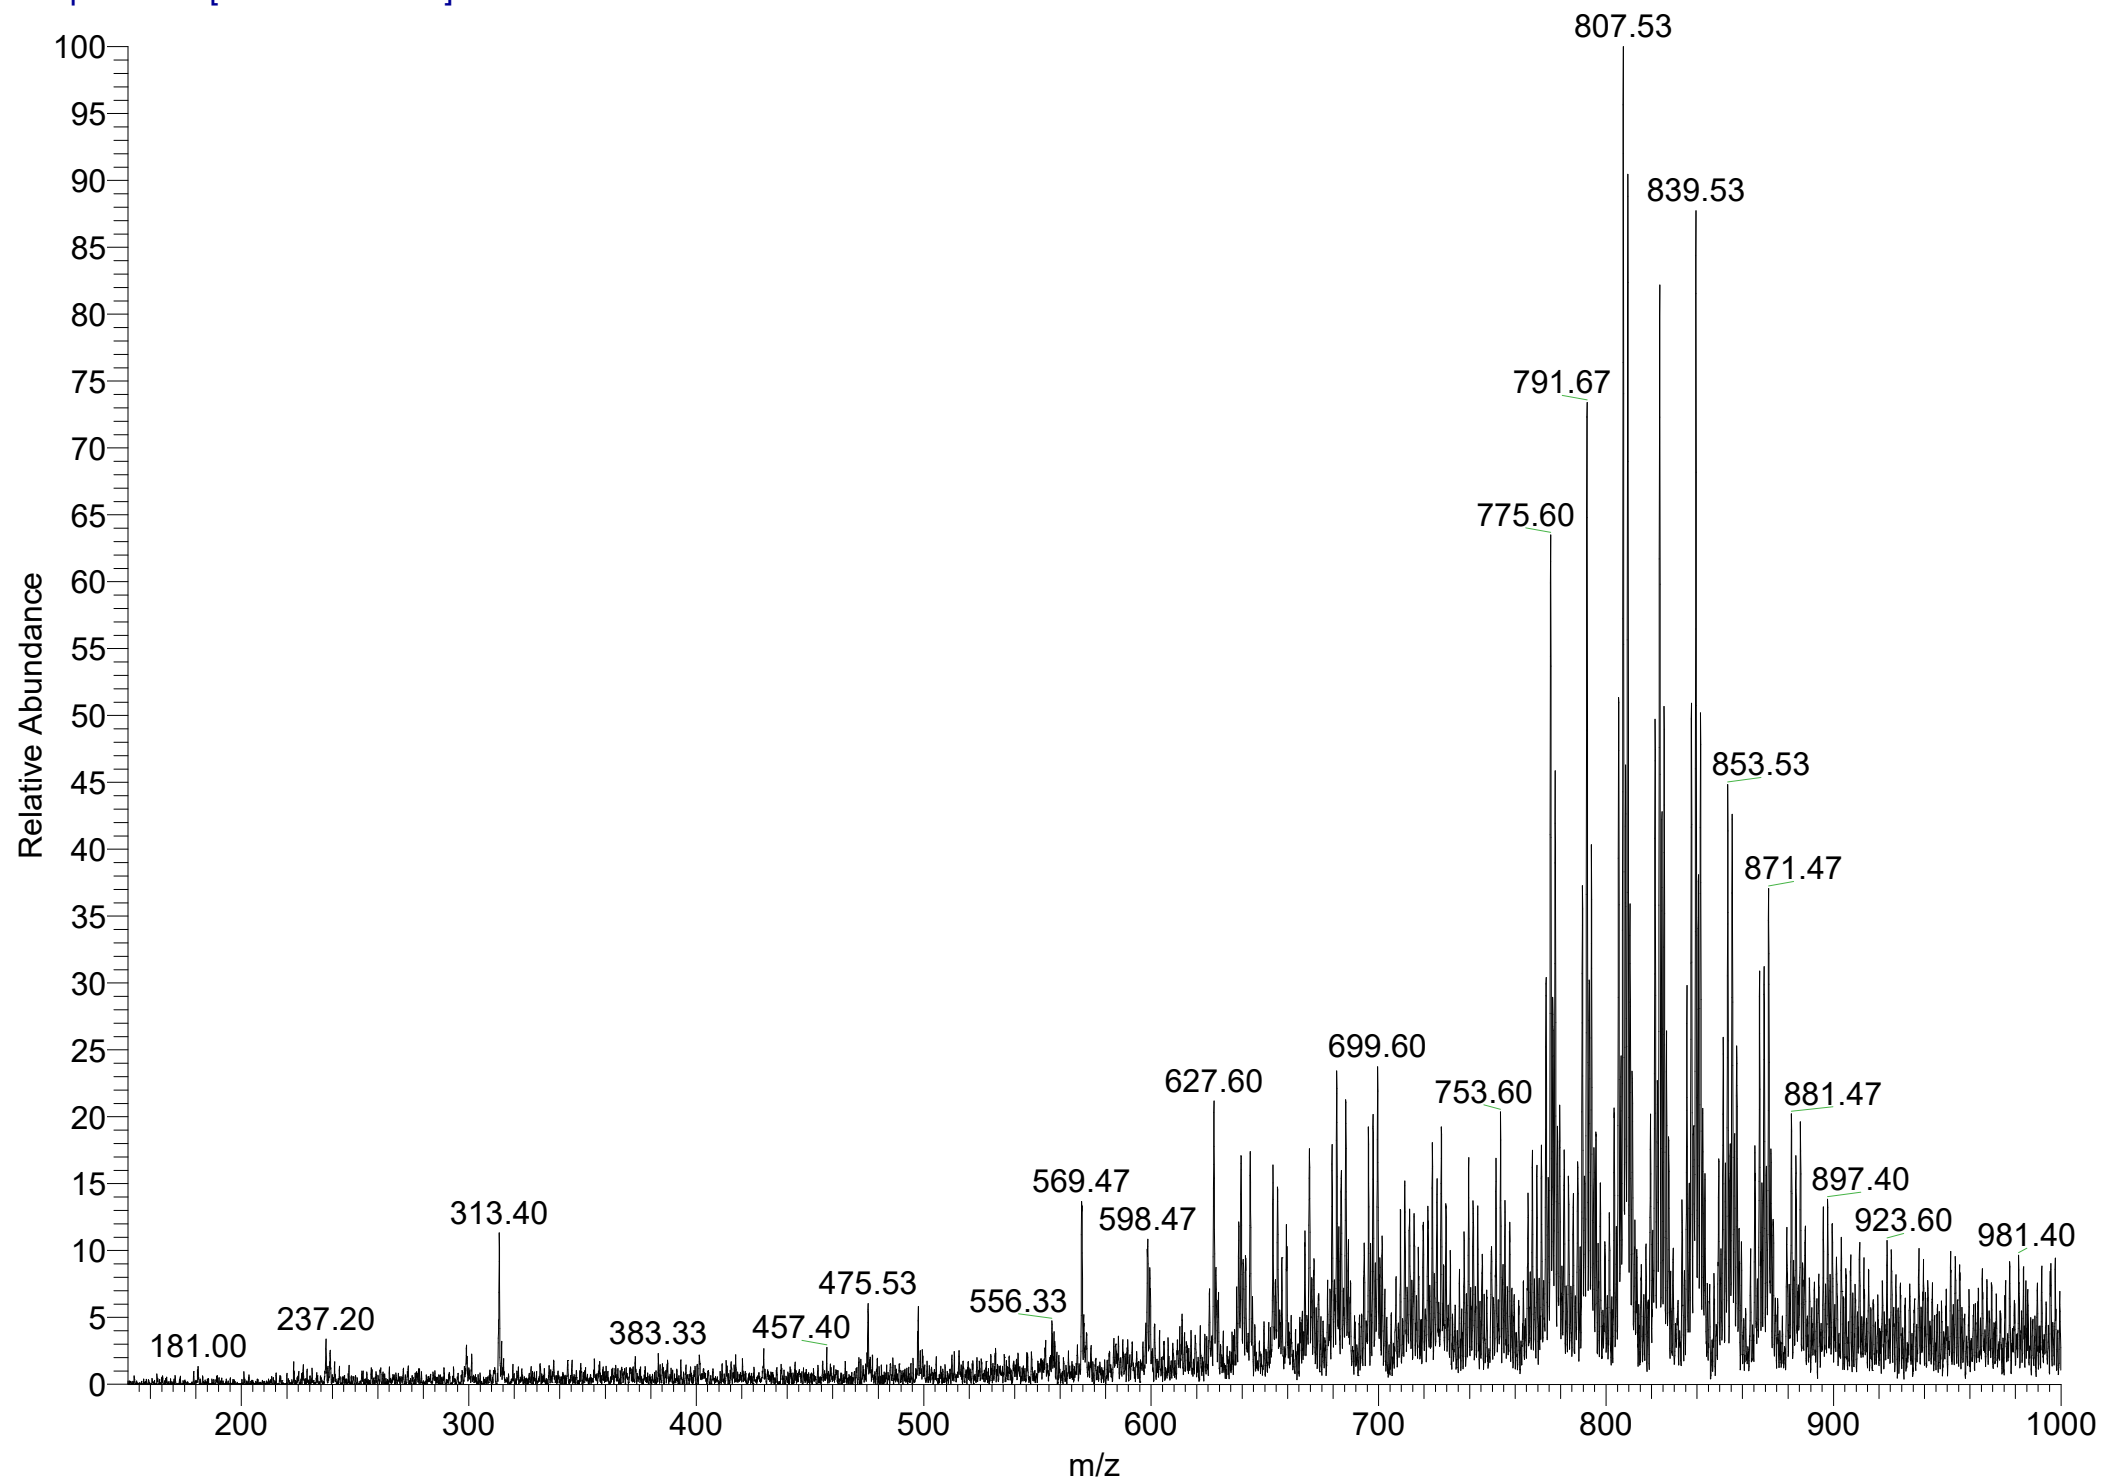

CH4 #1-50 RT: 0.00-0.74 AV: 50 NL: 7.04E5

T: + p ESI ms [150.00-1000.00]

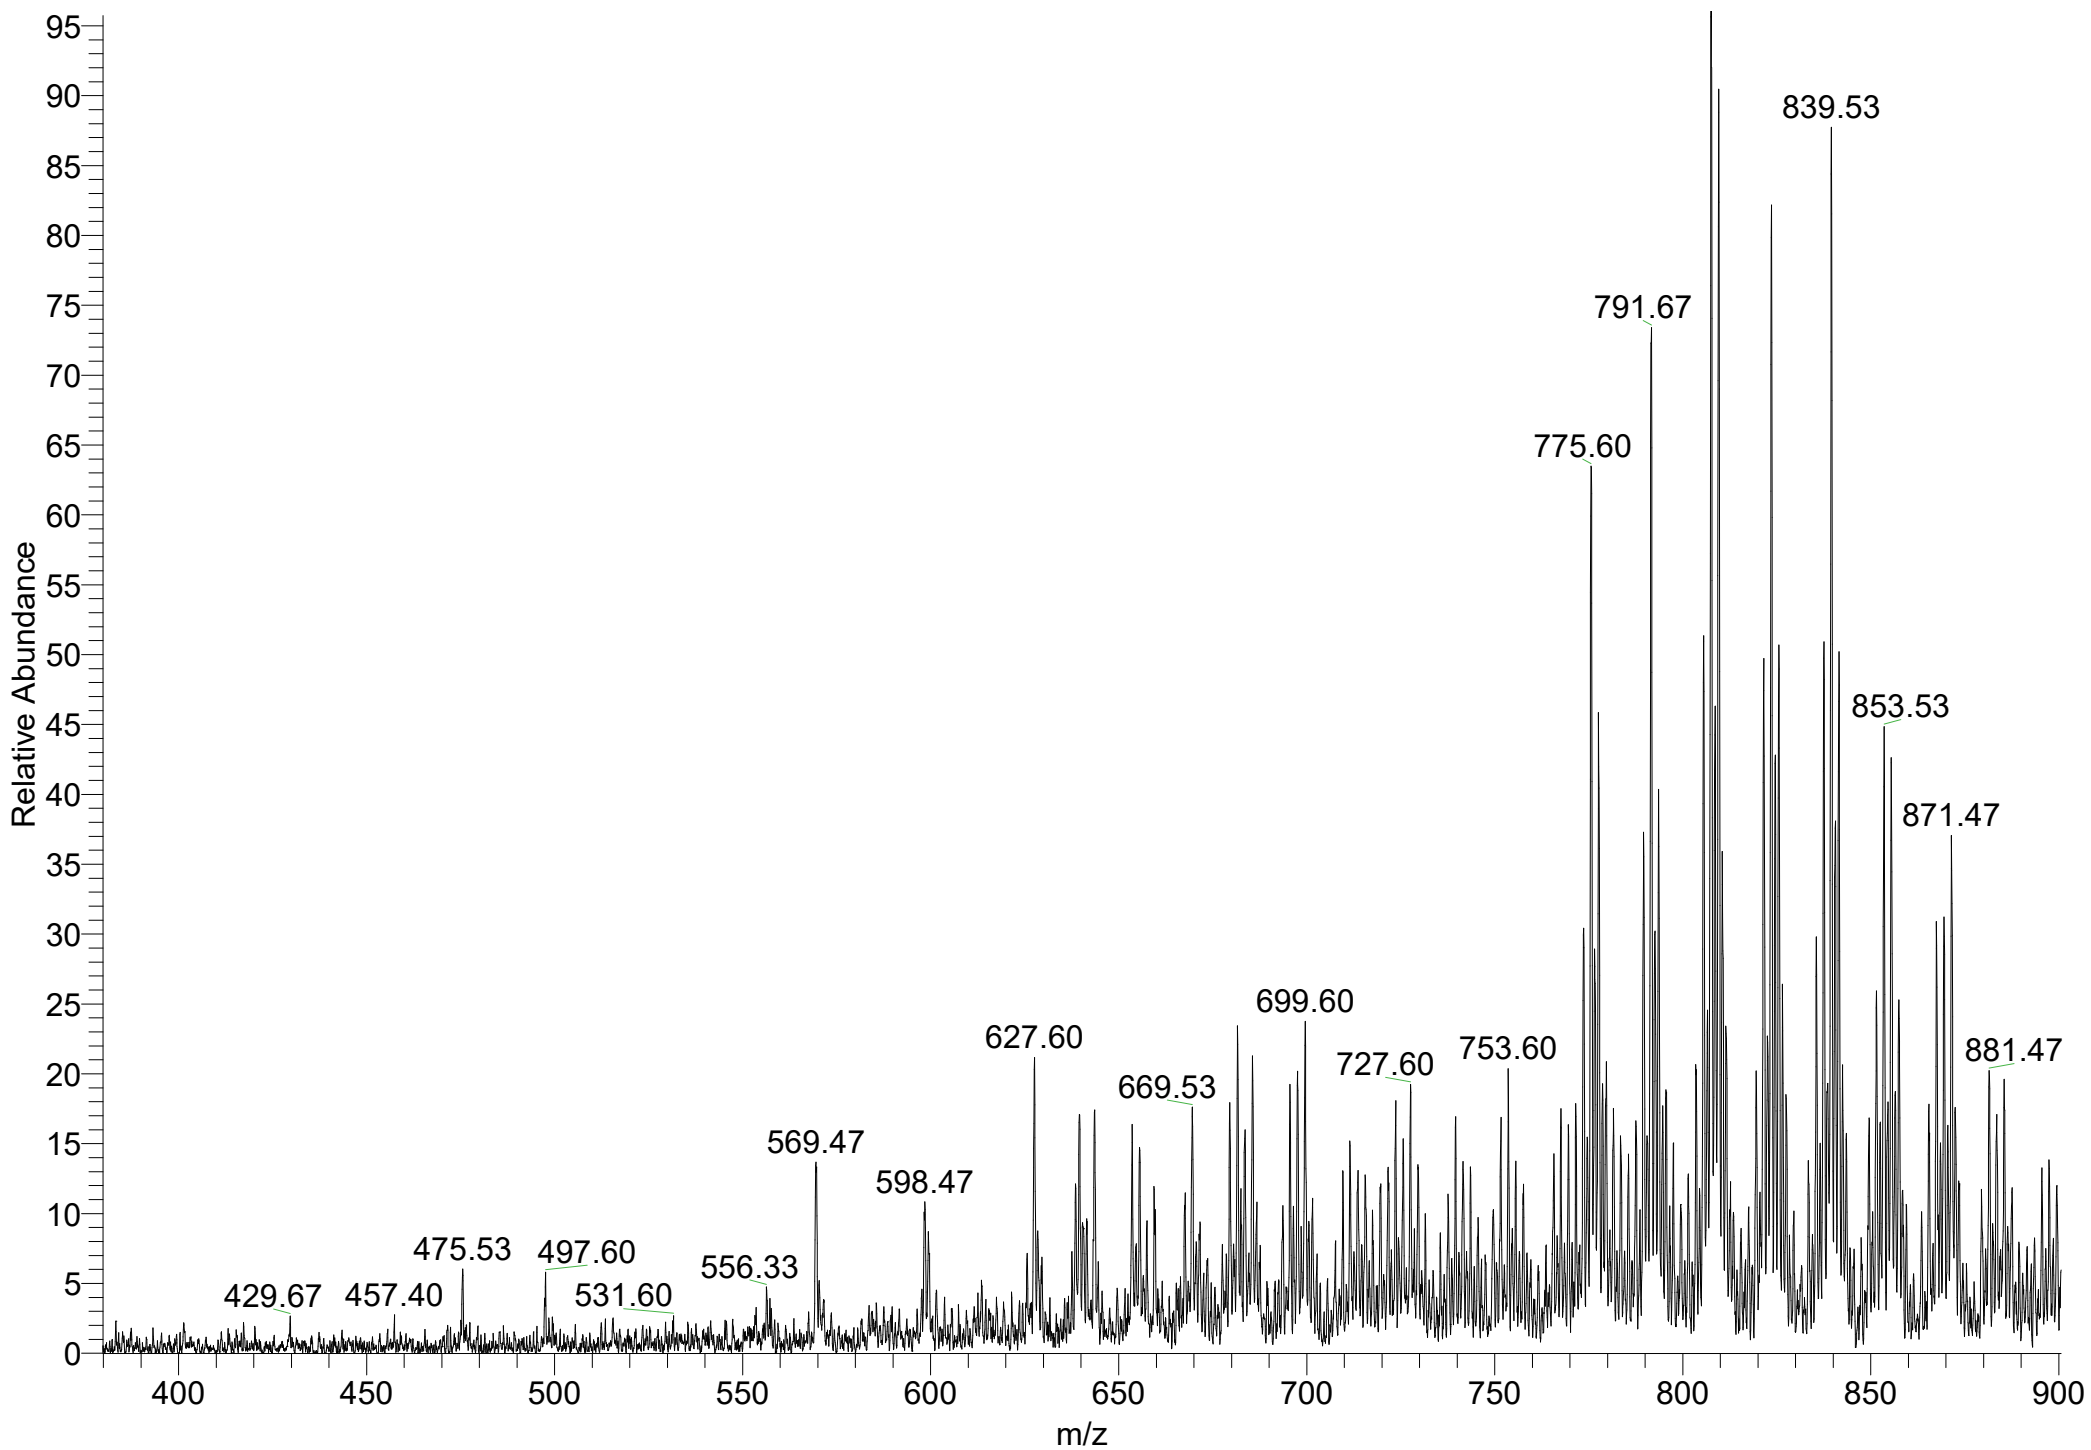

CH5 #1-50 RT: 0.01-0.75 AV: 50 NL: 9.18E5

T: + p ESI ms [150.00-1000.00]

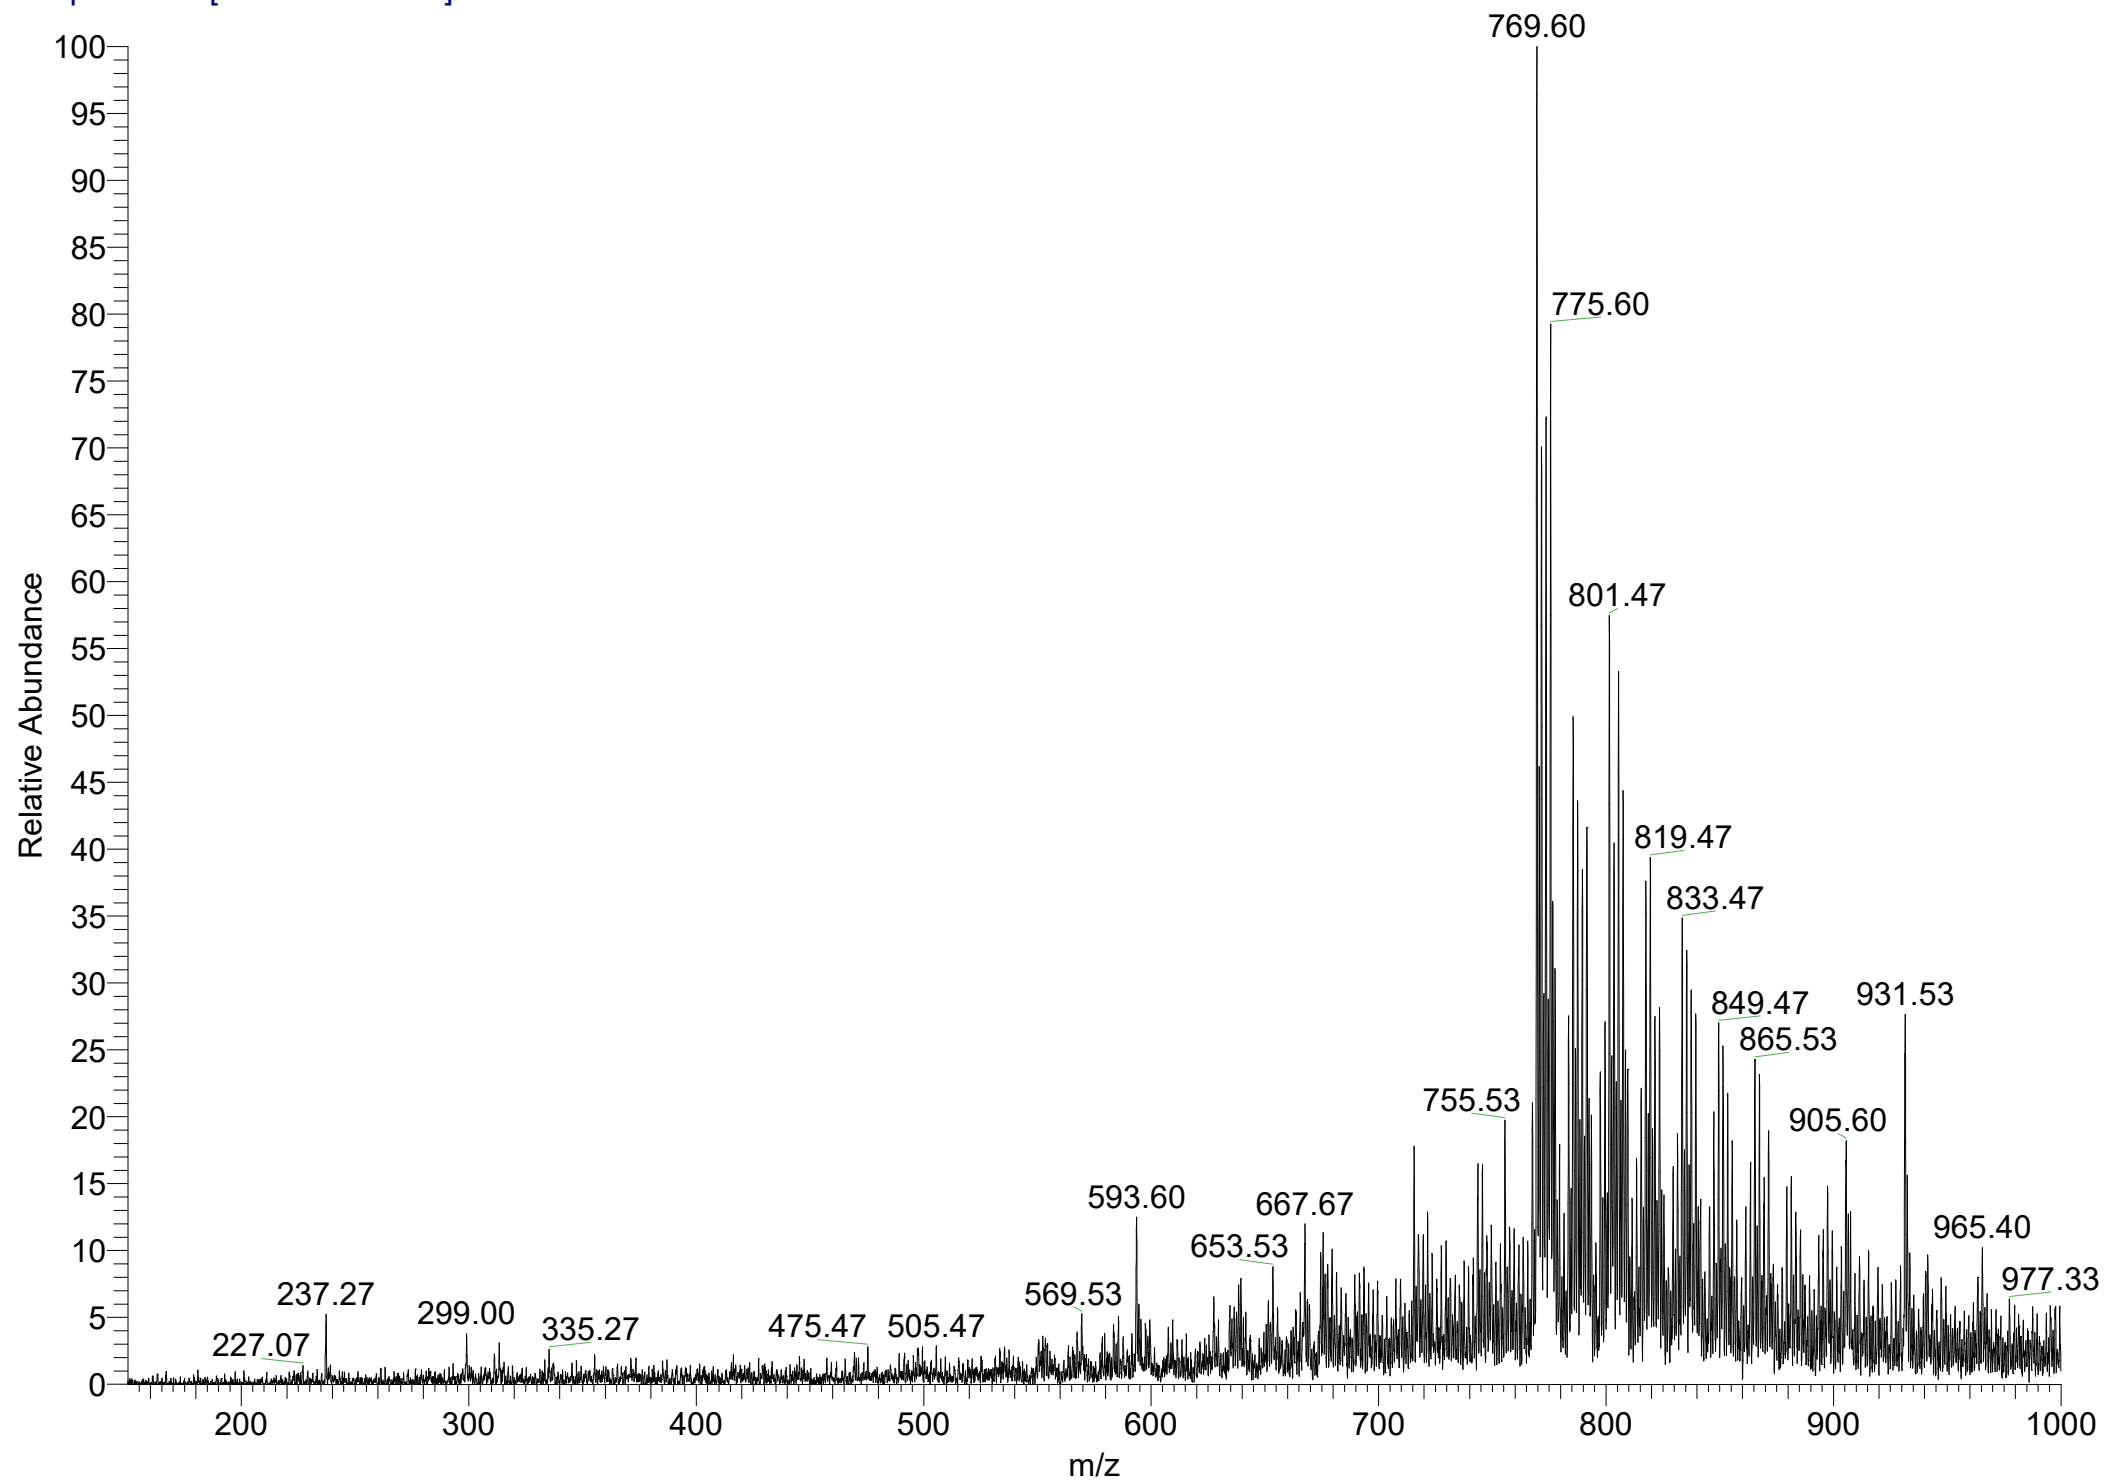



CH5 #1-50 RT: 0.01-0.75 AV: 50 NL: 9.18E5

T: + p ESI ms [150.00-1000.00]

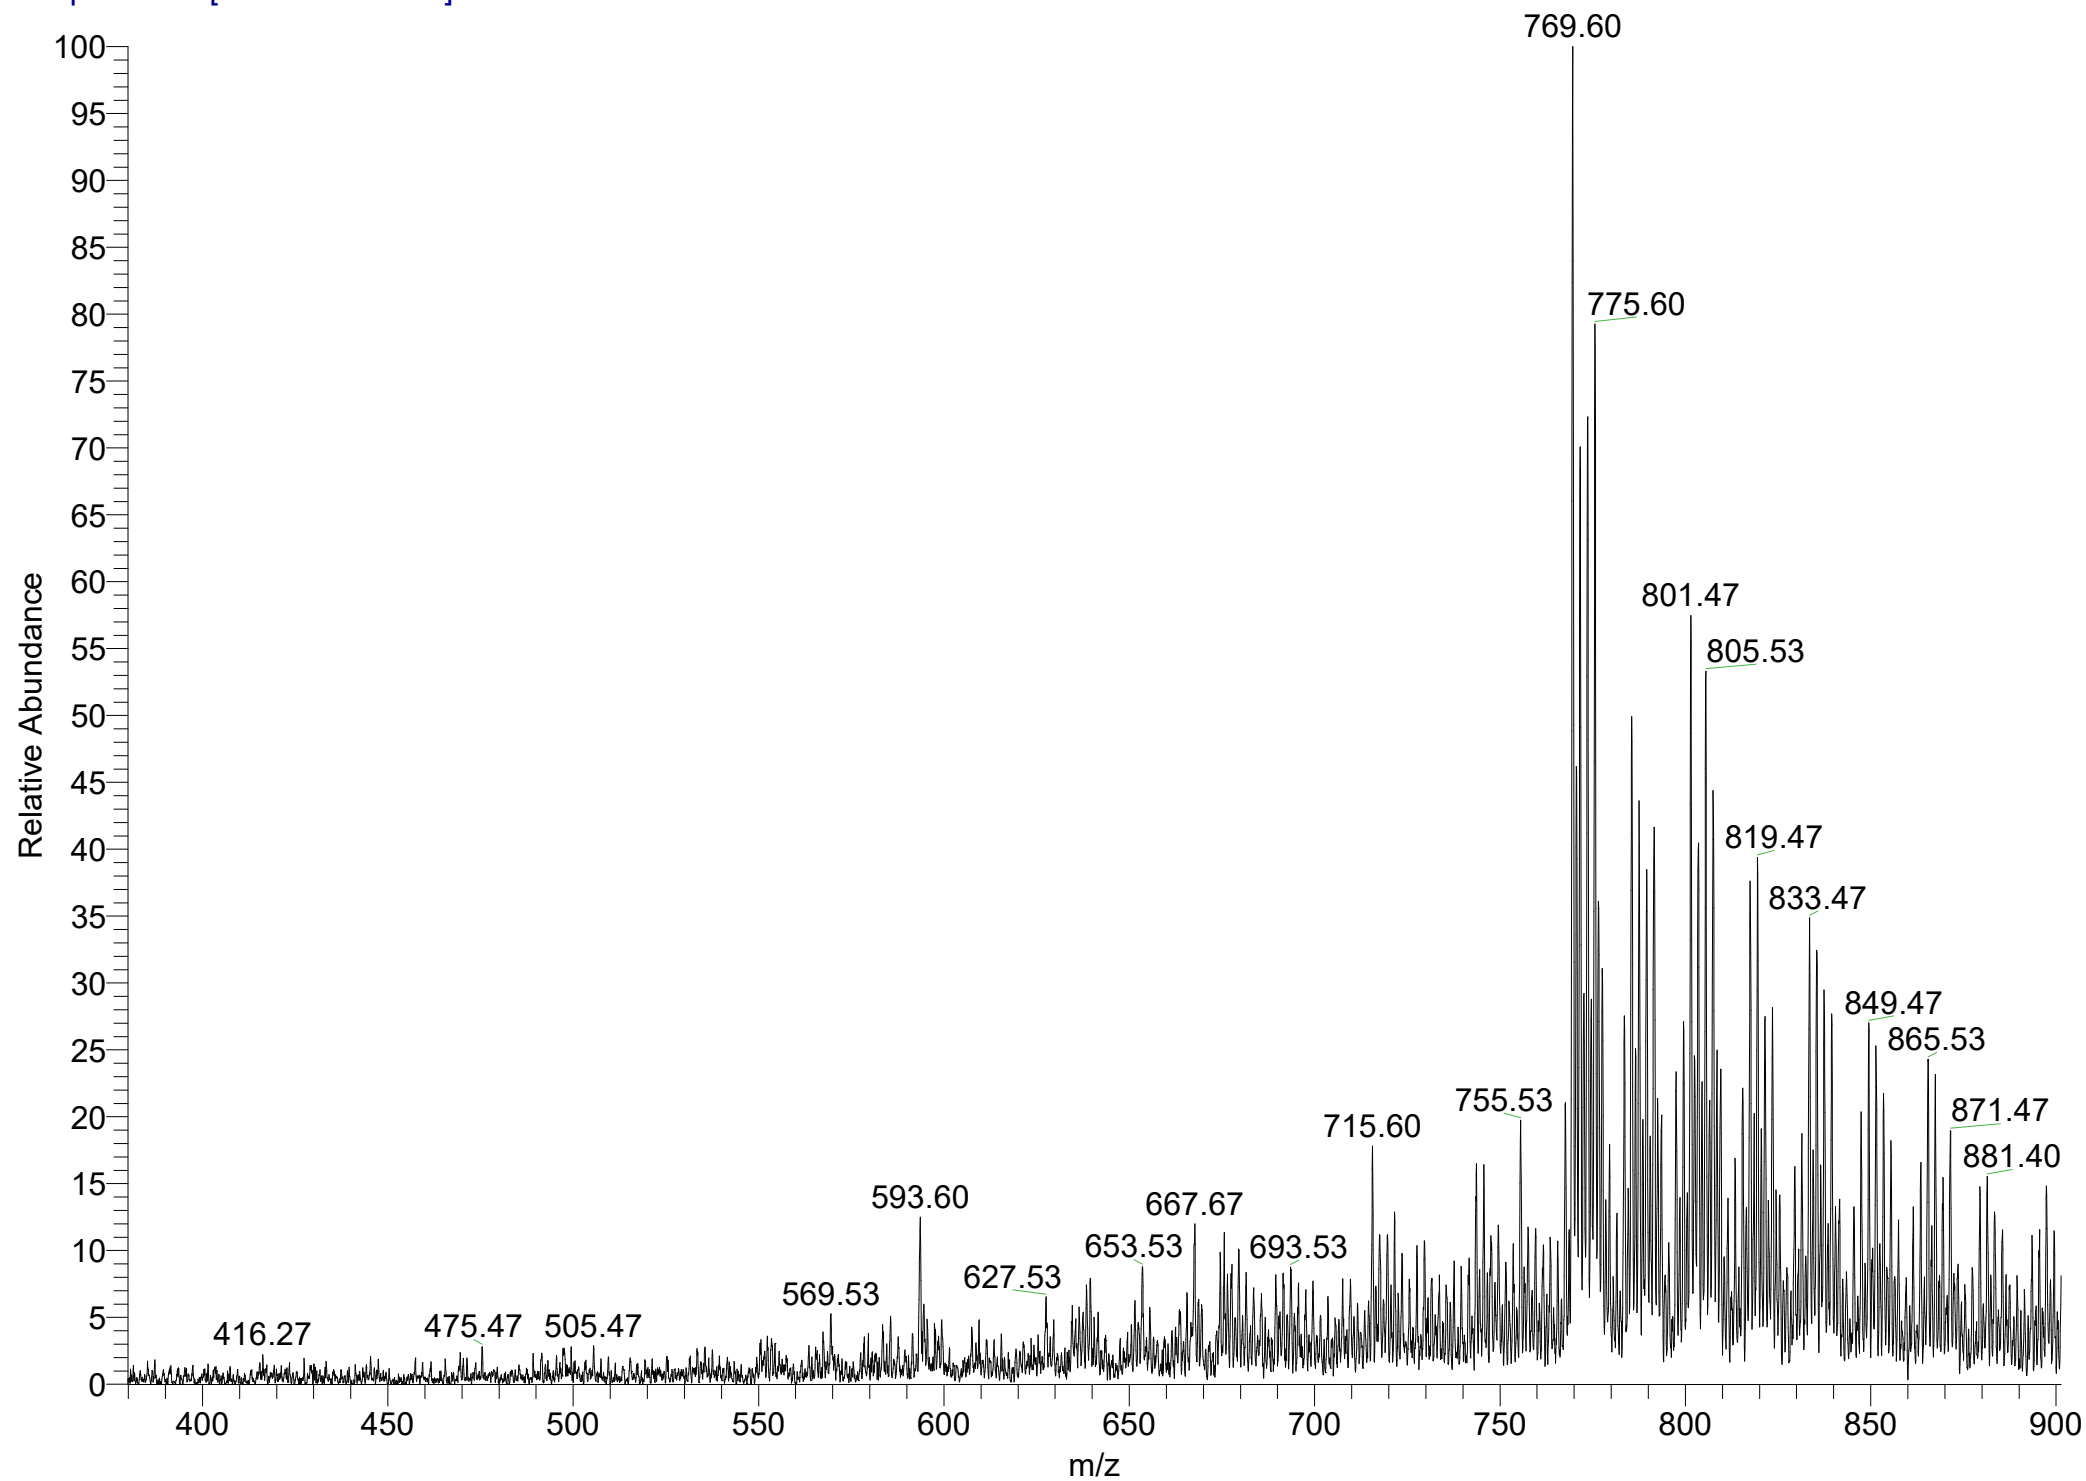

CH6 #1-50 RT: 0.00-0.74 AV: 50 NL: 3.12E6

T: + p ESI ms [150.00-1000.00]

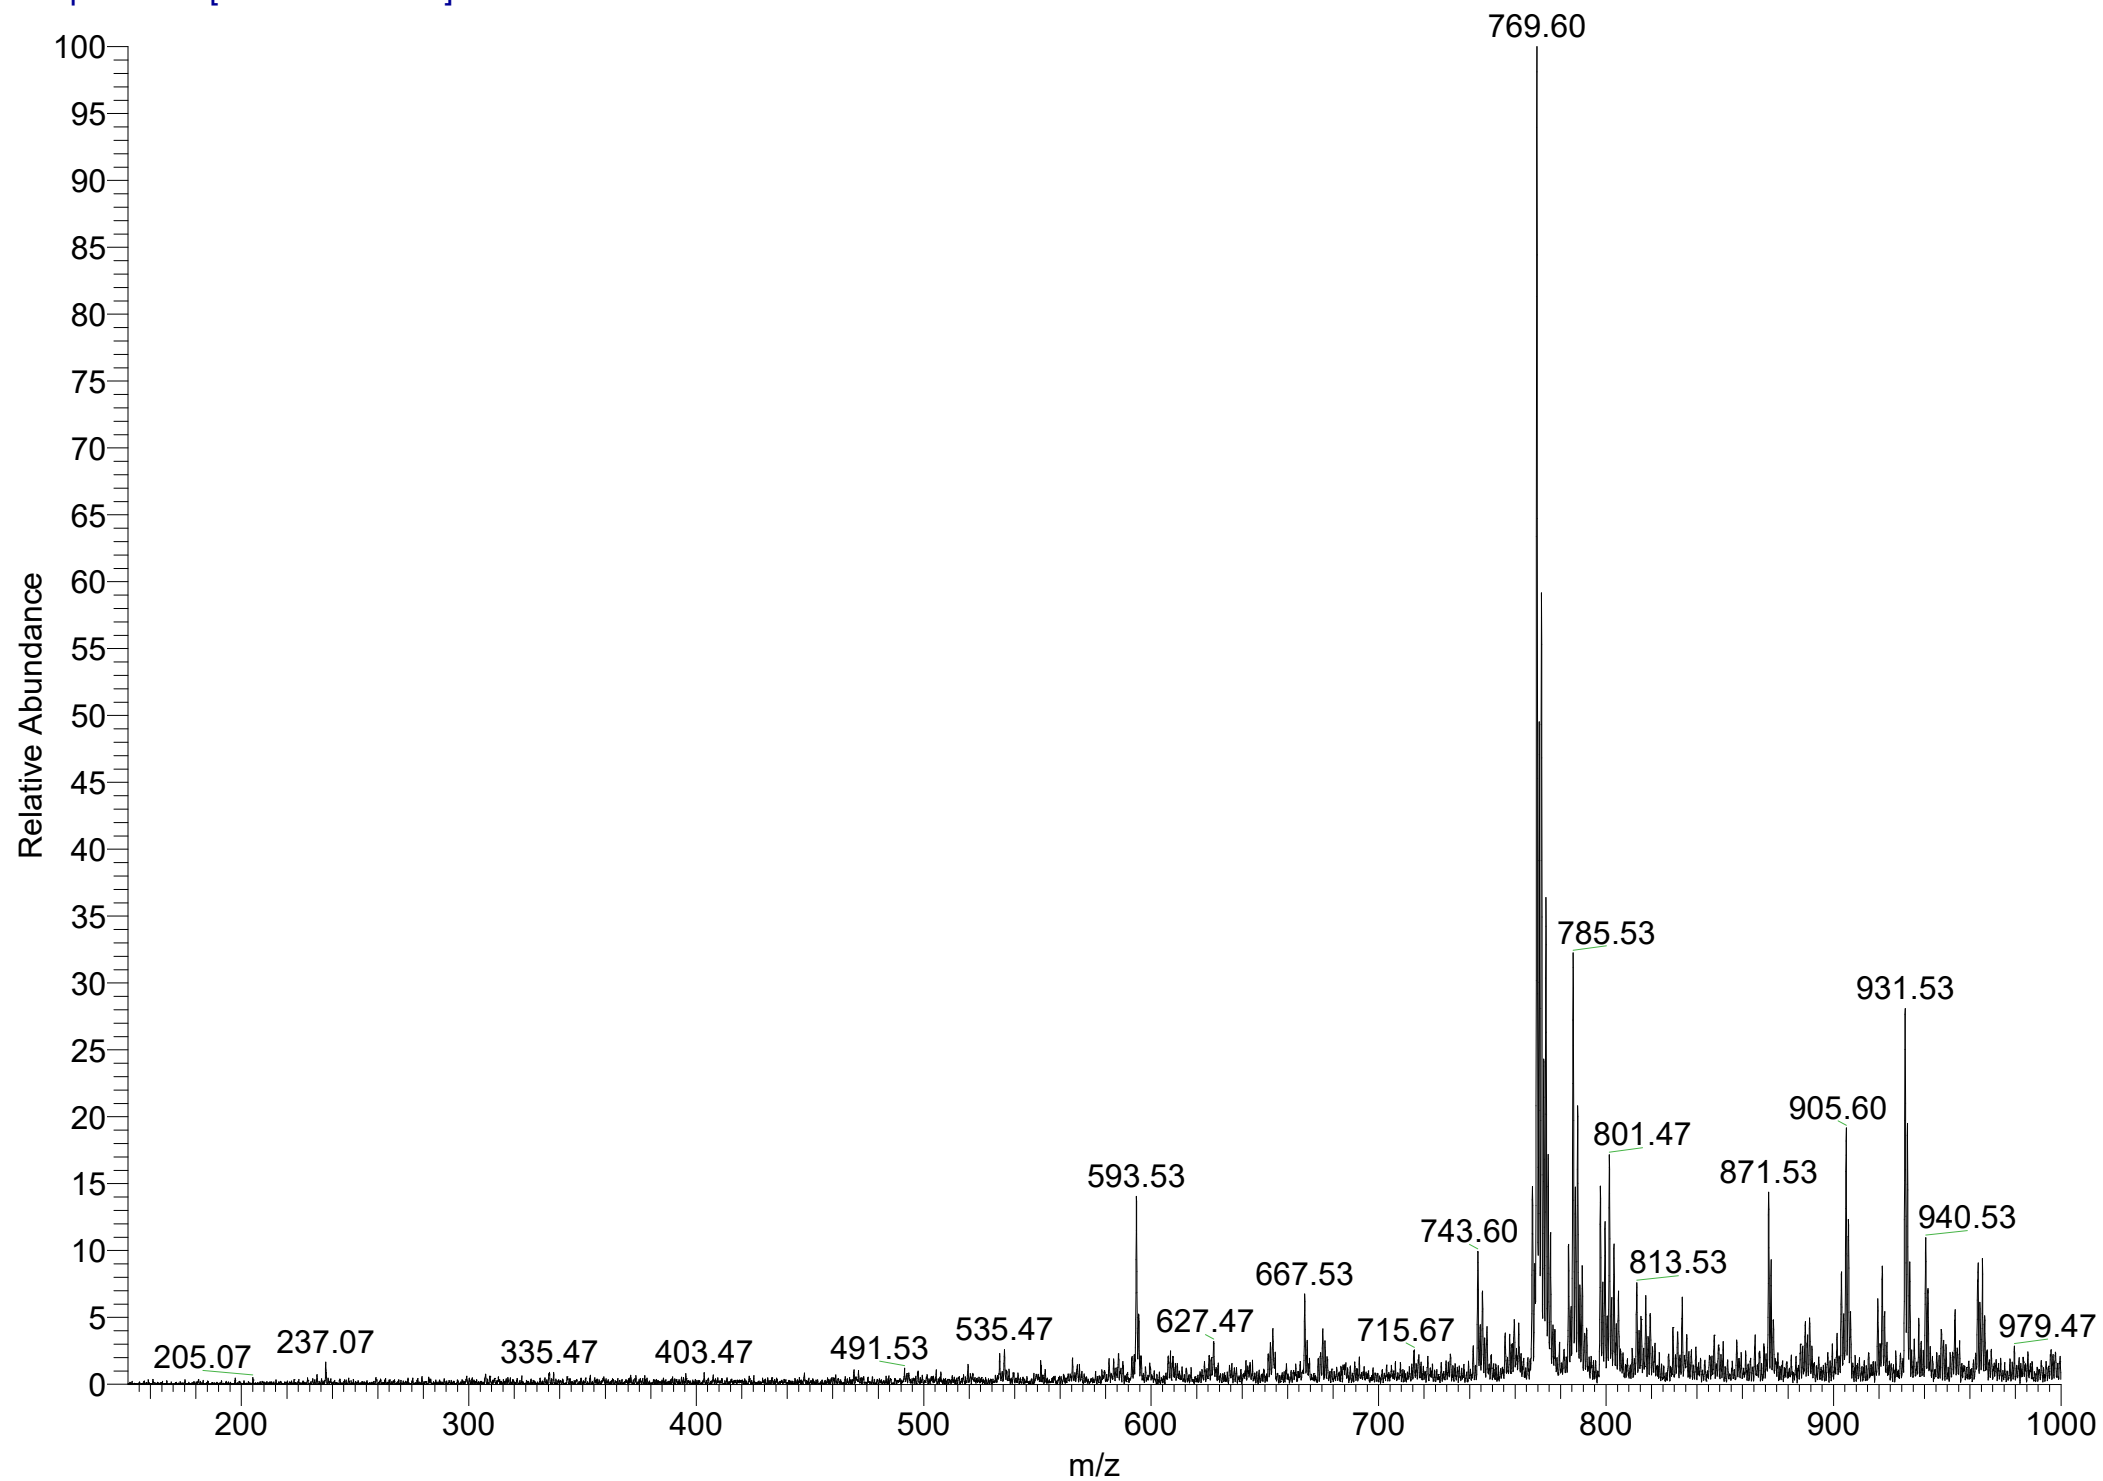

CH6 #1-50 RT: 0.00-0.74 AV: 50 NL: 3.12E6

T: + p ESI ms [150.00-1000.00]

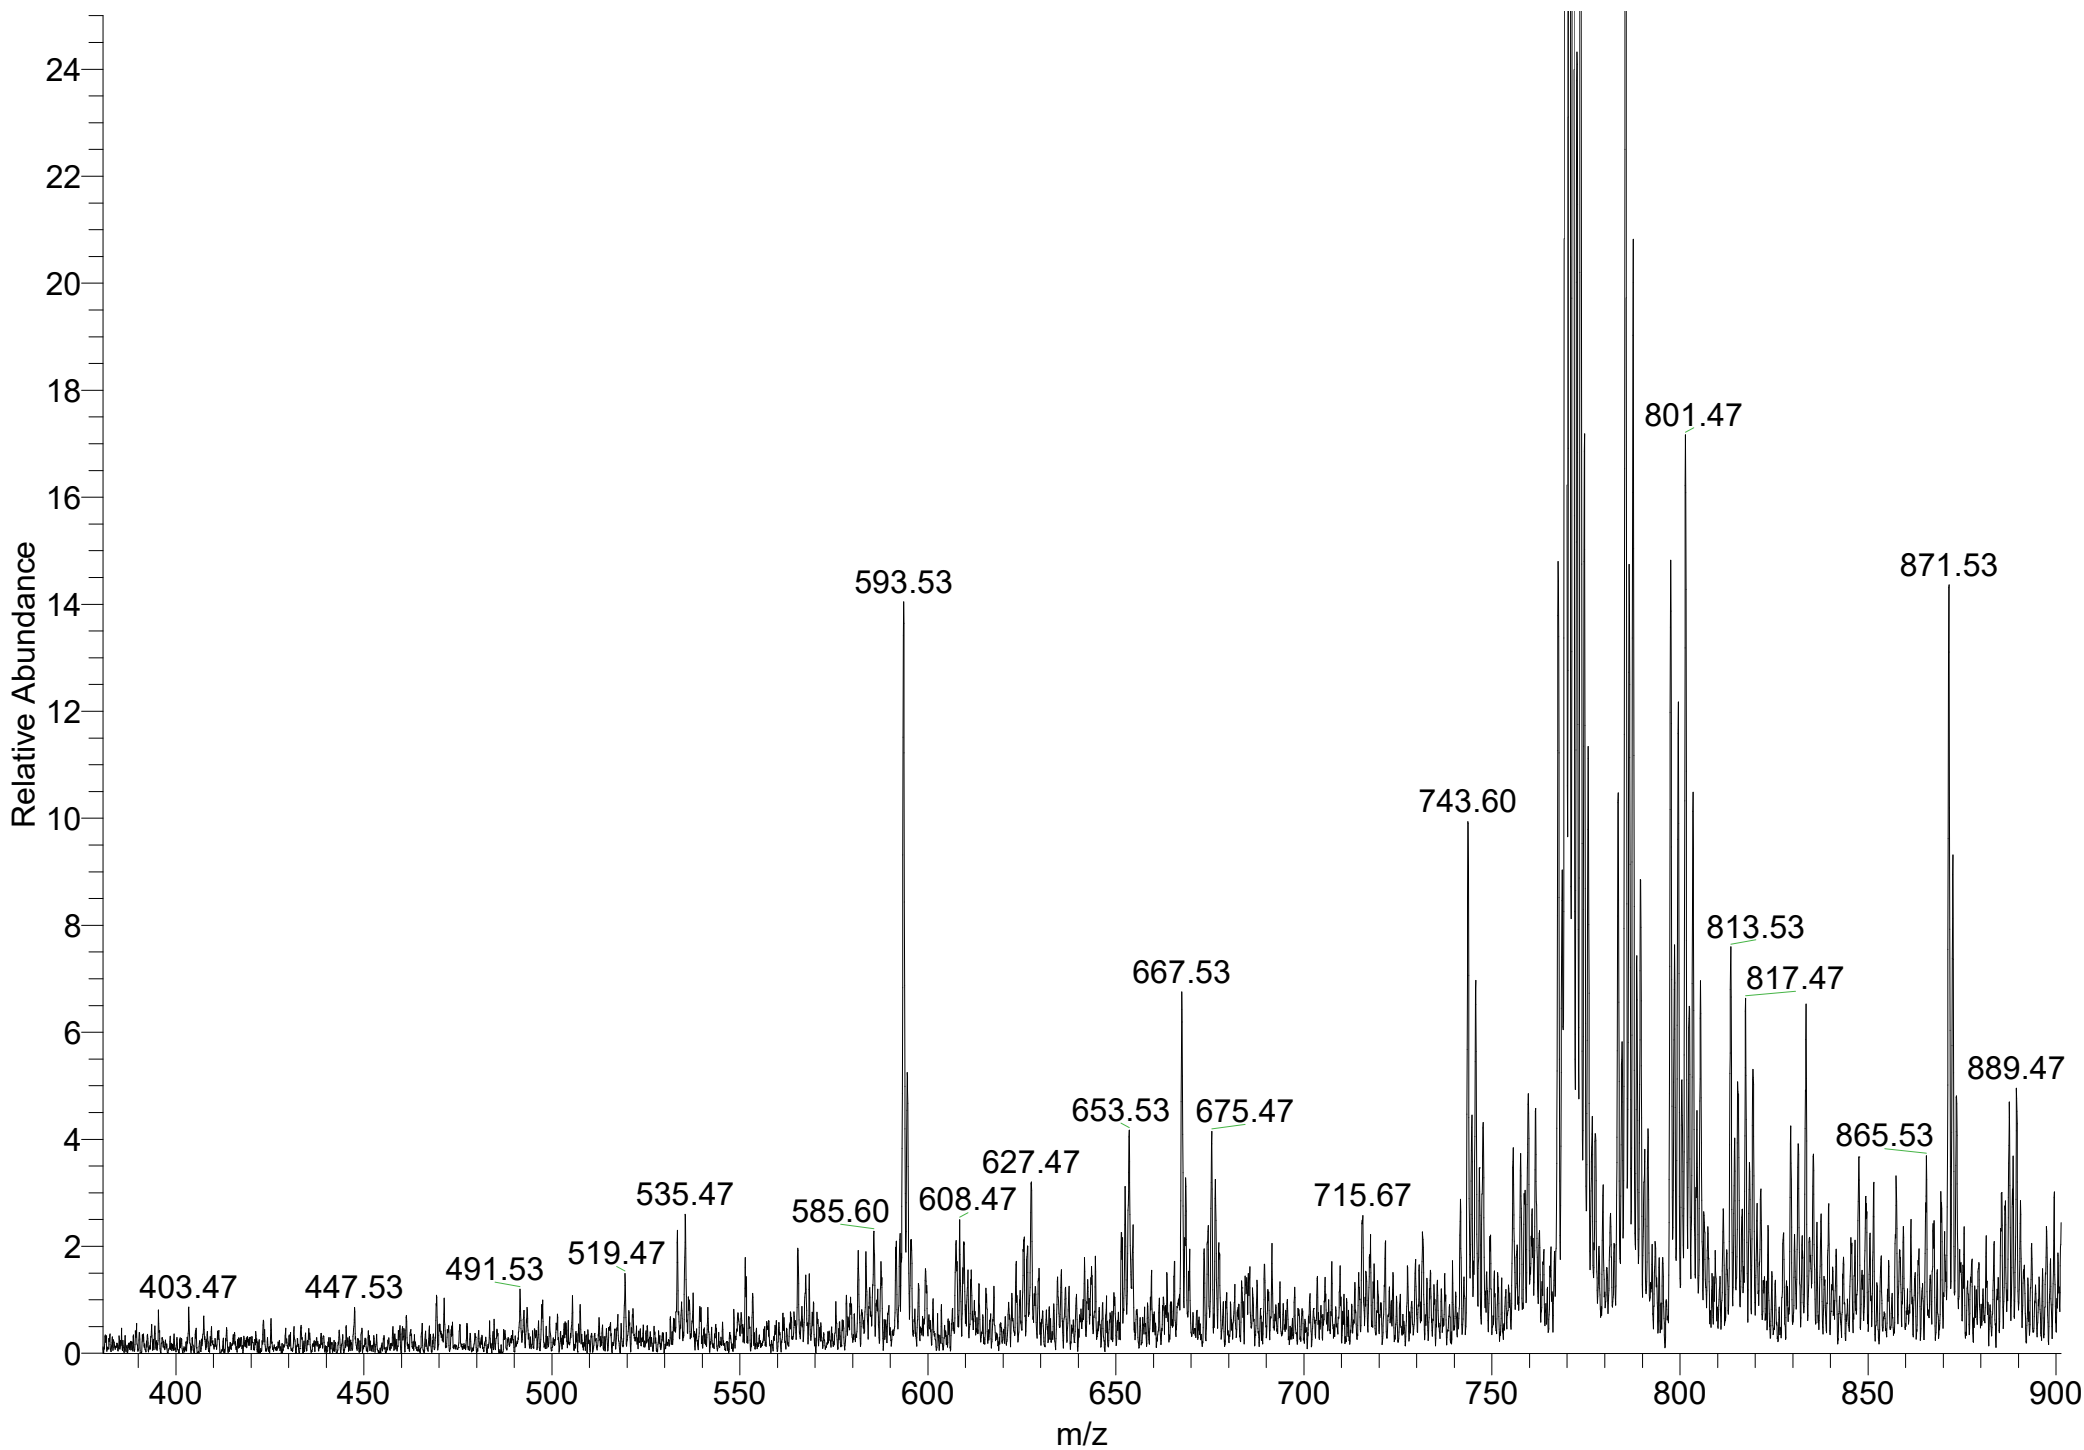

CH7 #1-50 RT: 0.01-0.75 AV: 50 NL: 2.45E6

T: + p ESI ms [150.00-1000.00]

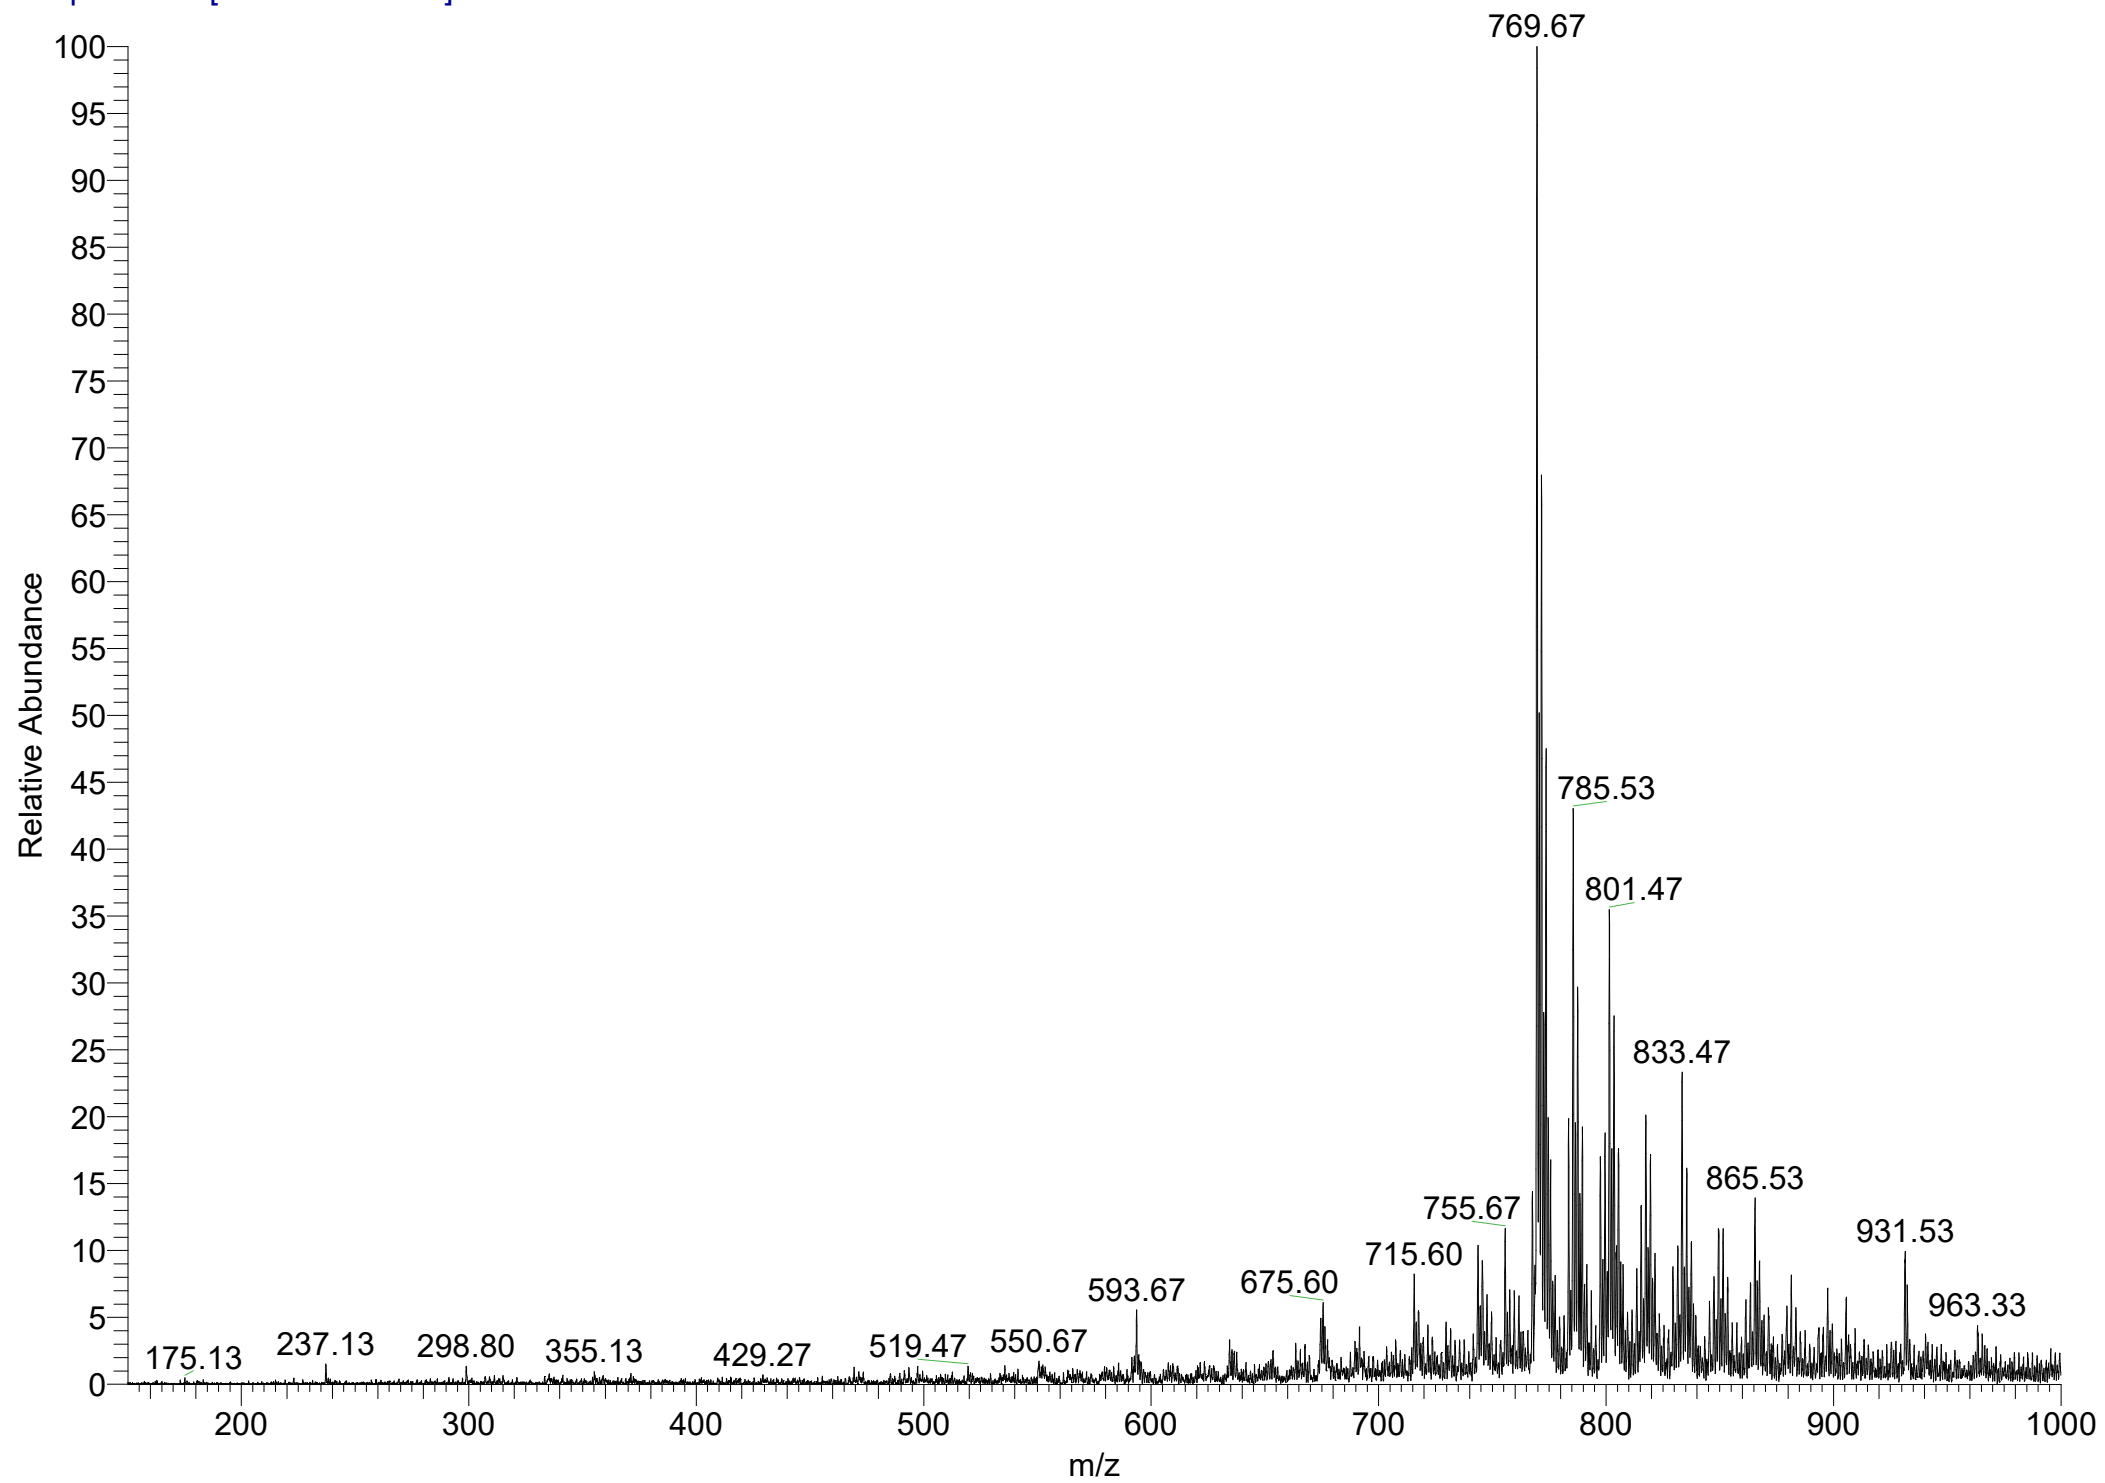

CH7 #1-50 RT: 0.01-0.75 AV: 50 NL: 2.45E6

T: + p ESI ms [150.00-1000.00]

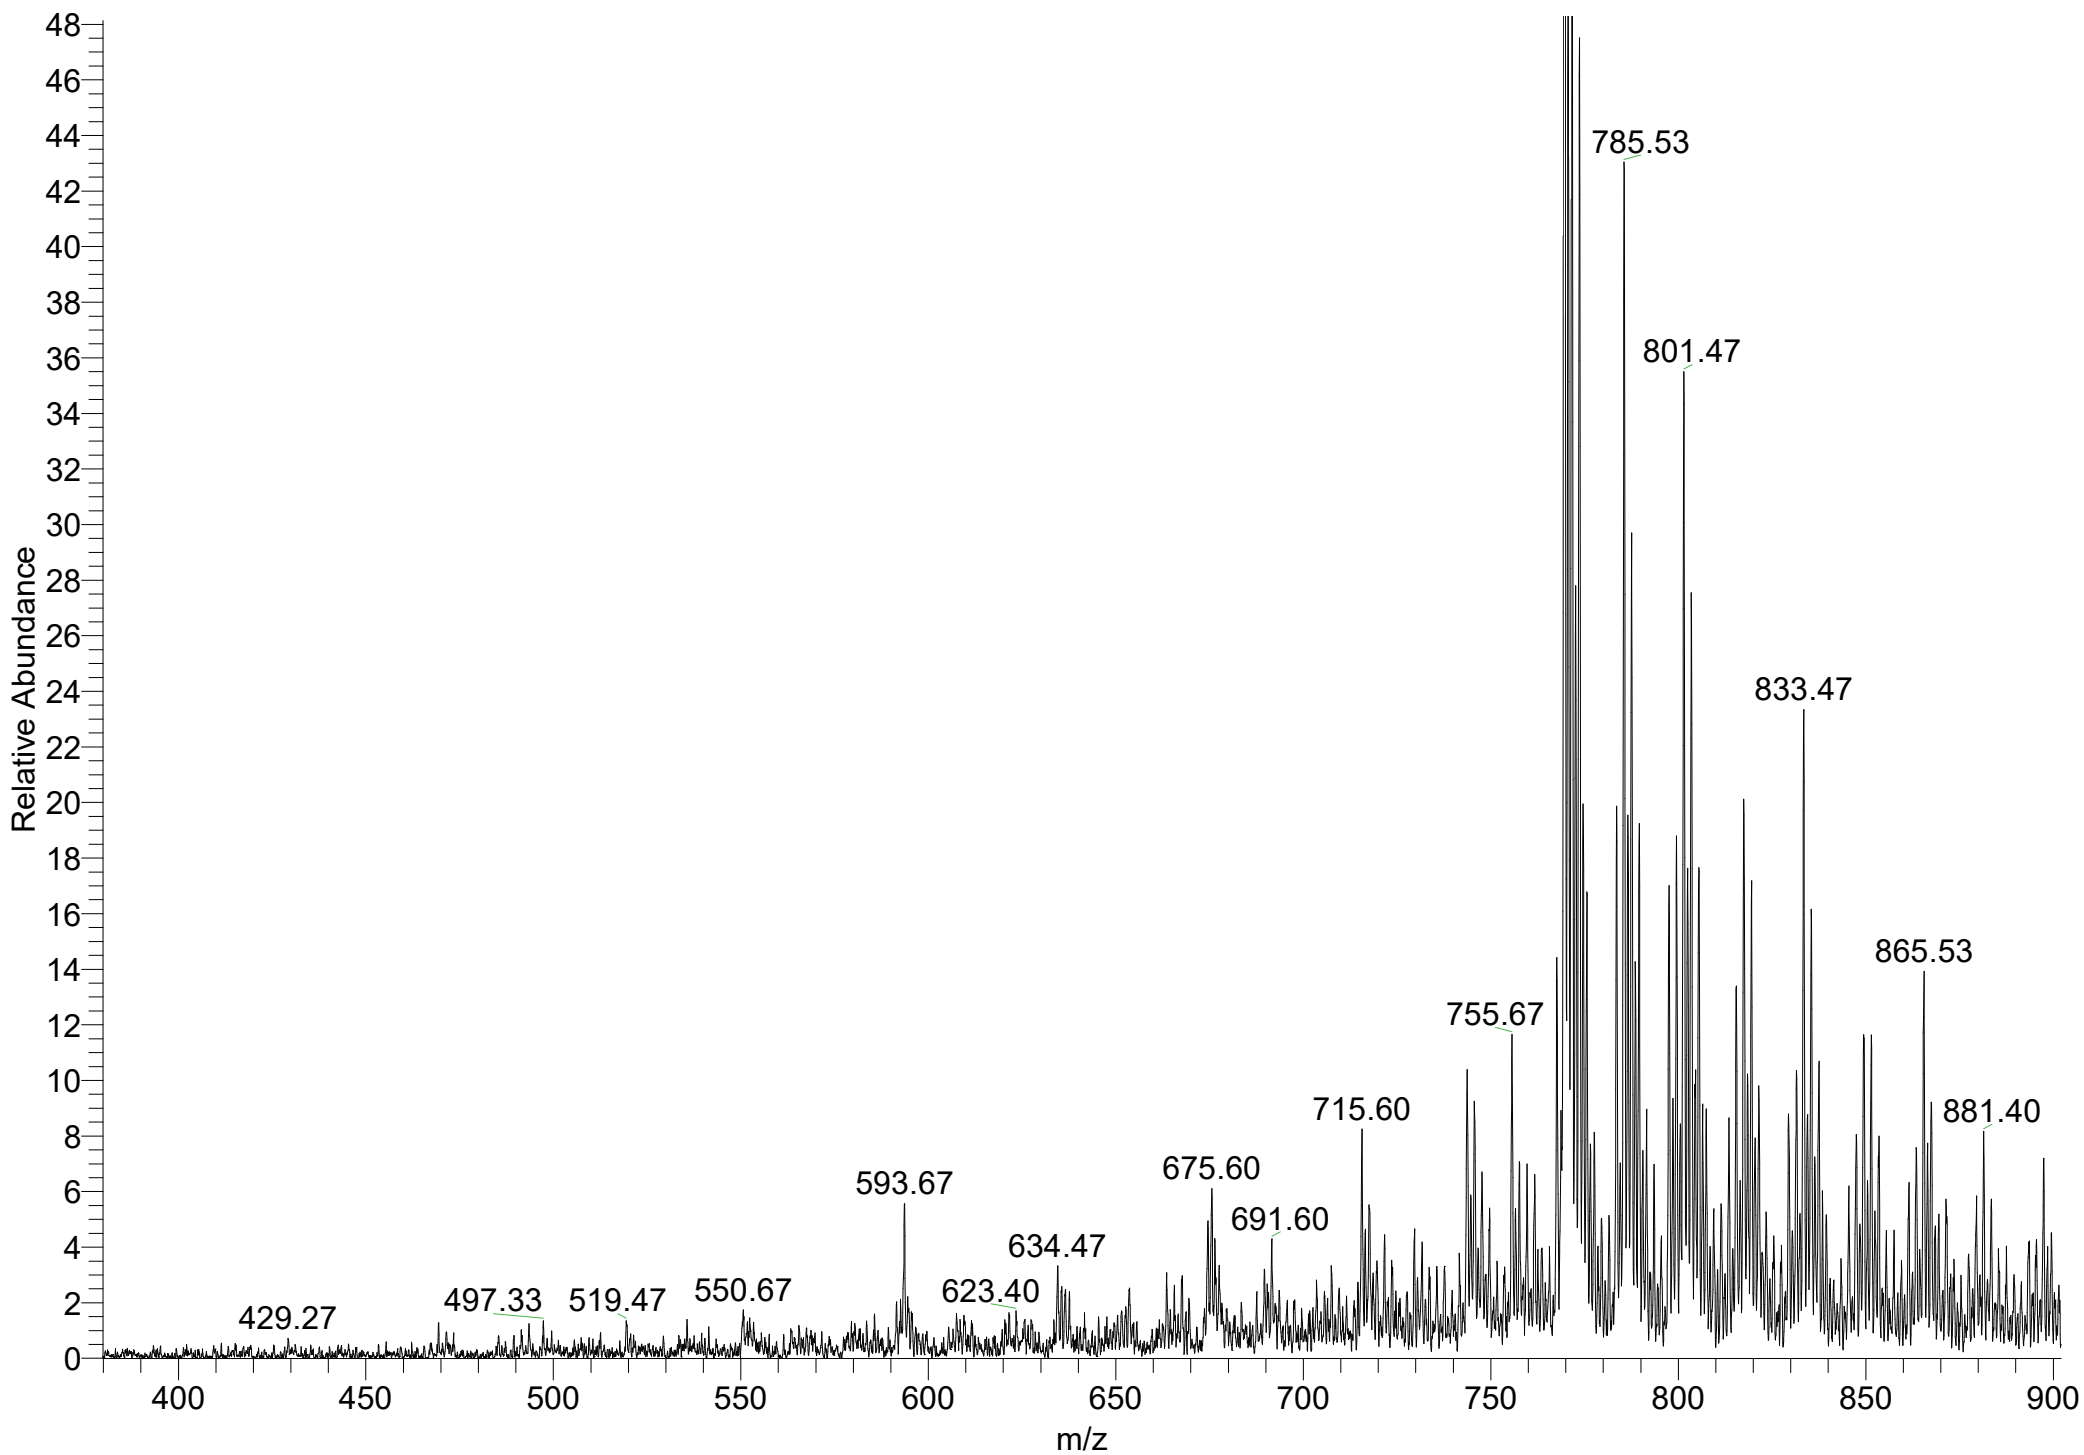

CH8 #1-50 RT: 0.01-0.75 AV: 50 NL: 1.33E6

T: + p ESI ms [150.00-1000.00]

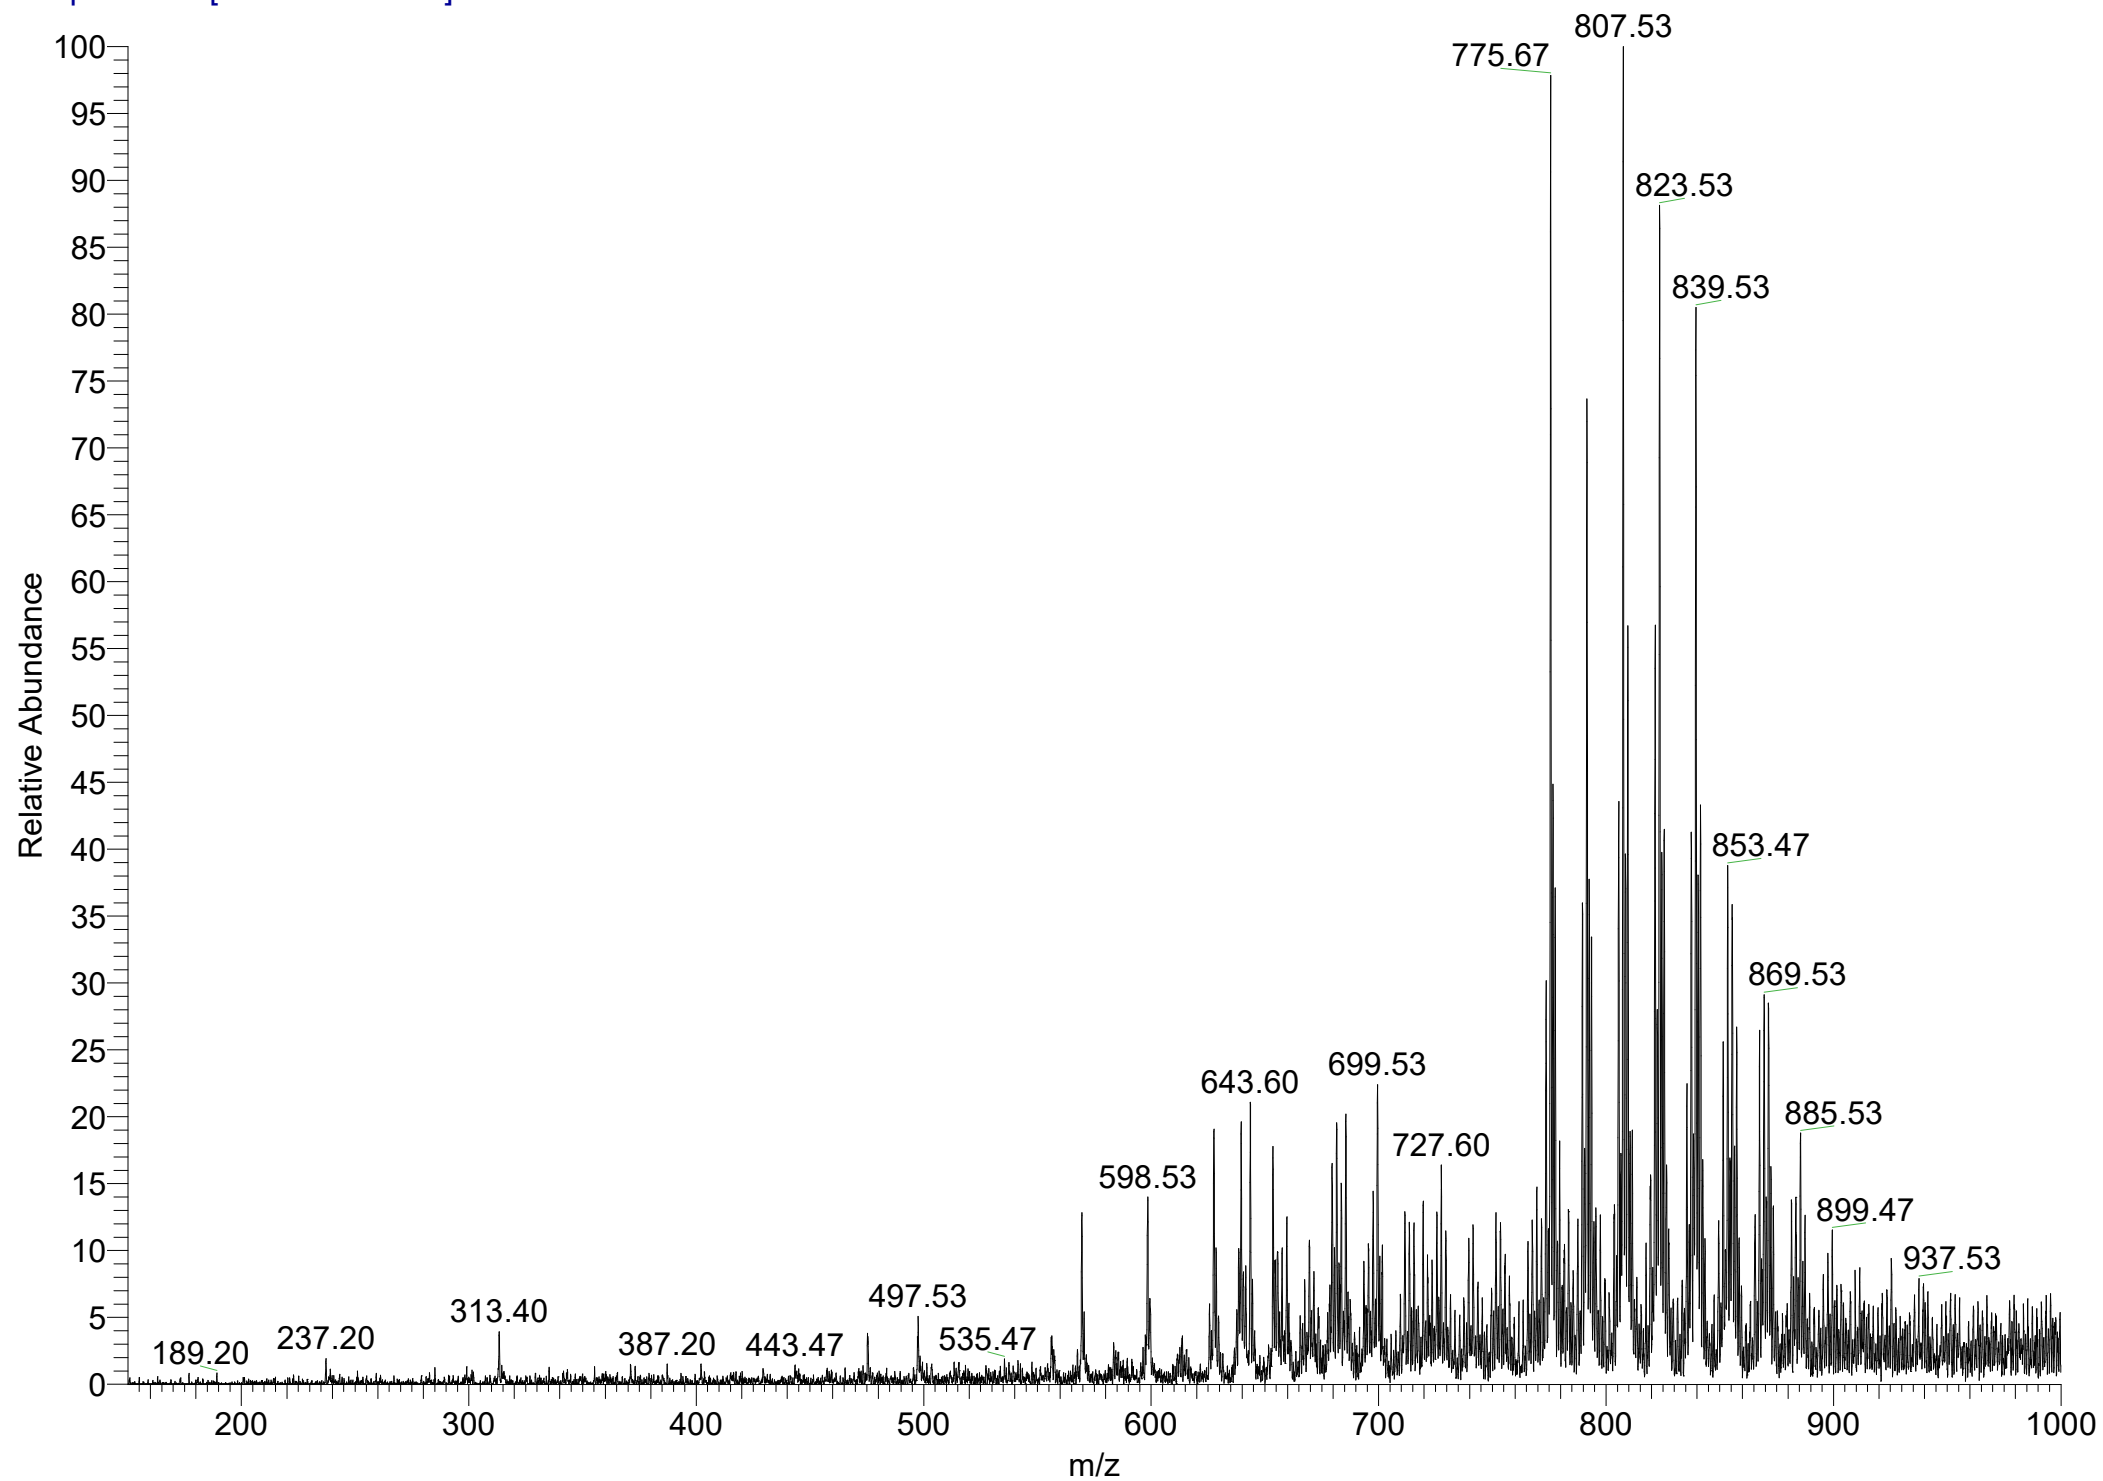

CH8 #1-50 RT: 0.01-0.75 AV: 50 NL: 1.33E6

T: + p ESI ms [150.00-1000.00]

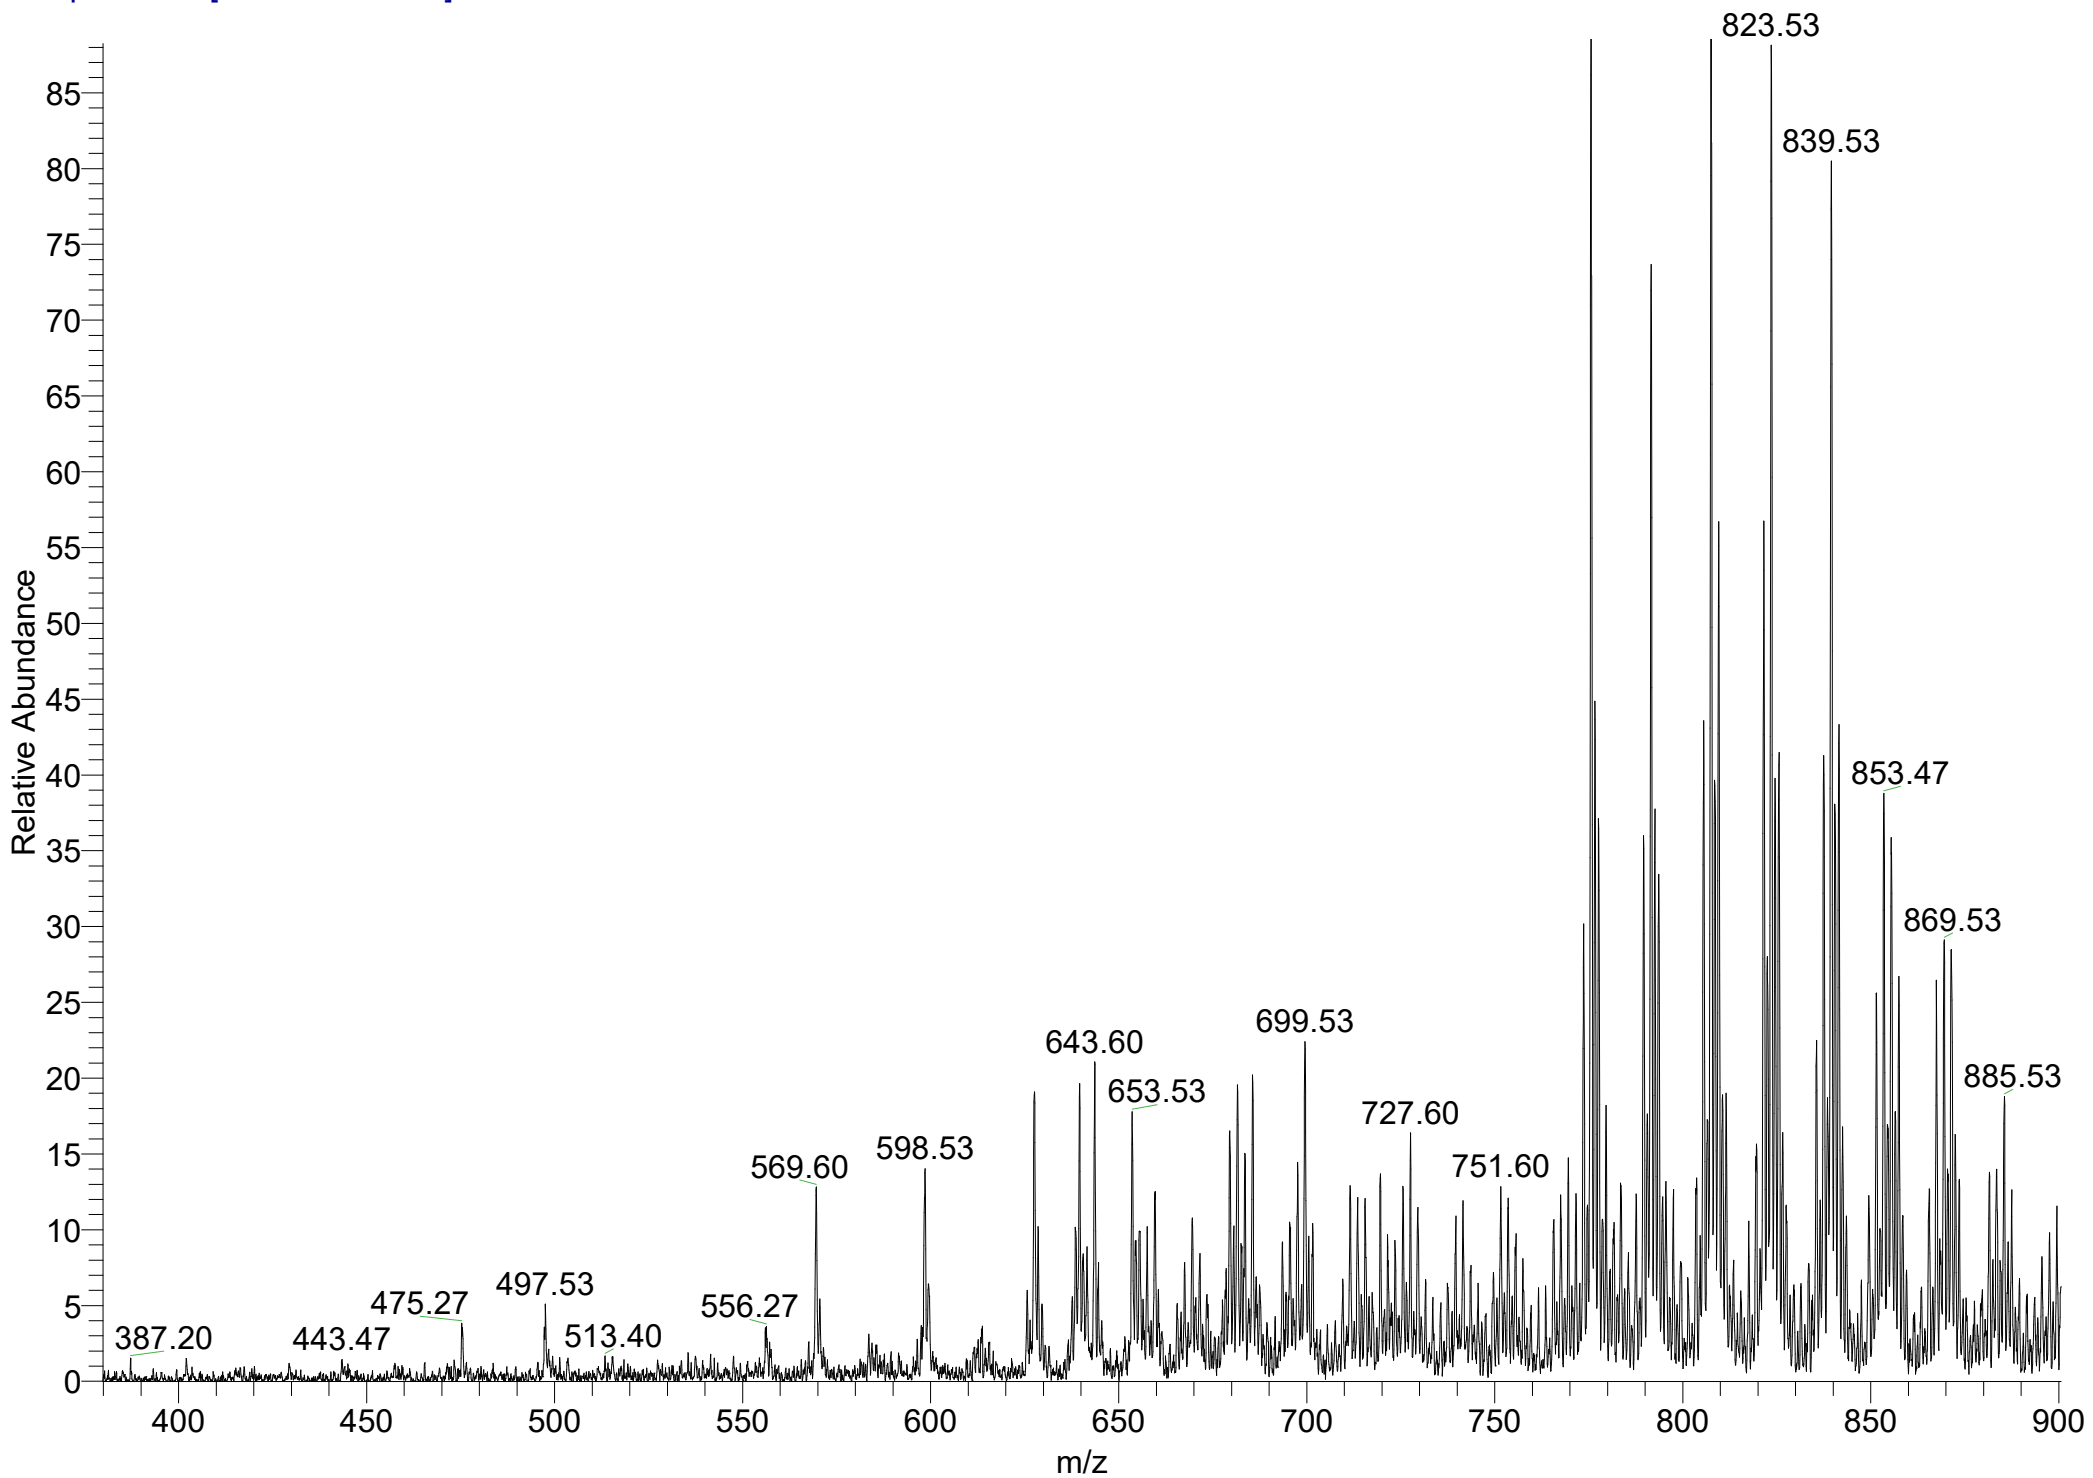

CH9 #1-50 RT: 0.01-0.74 AV: 50 NL: 1.59E6

T: + p ESI ms [150.00-1000.00]

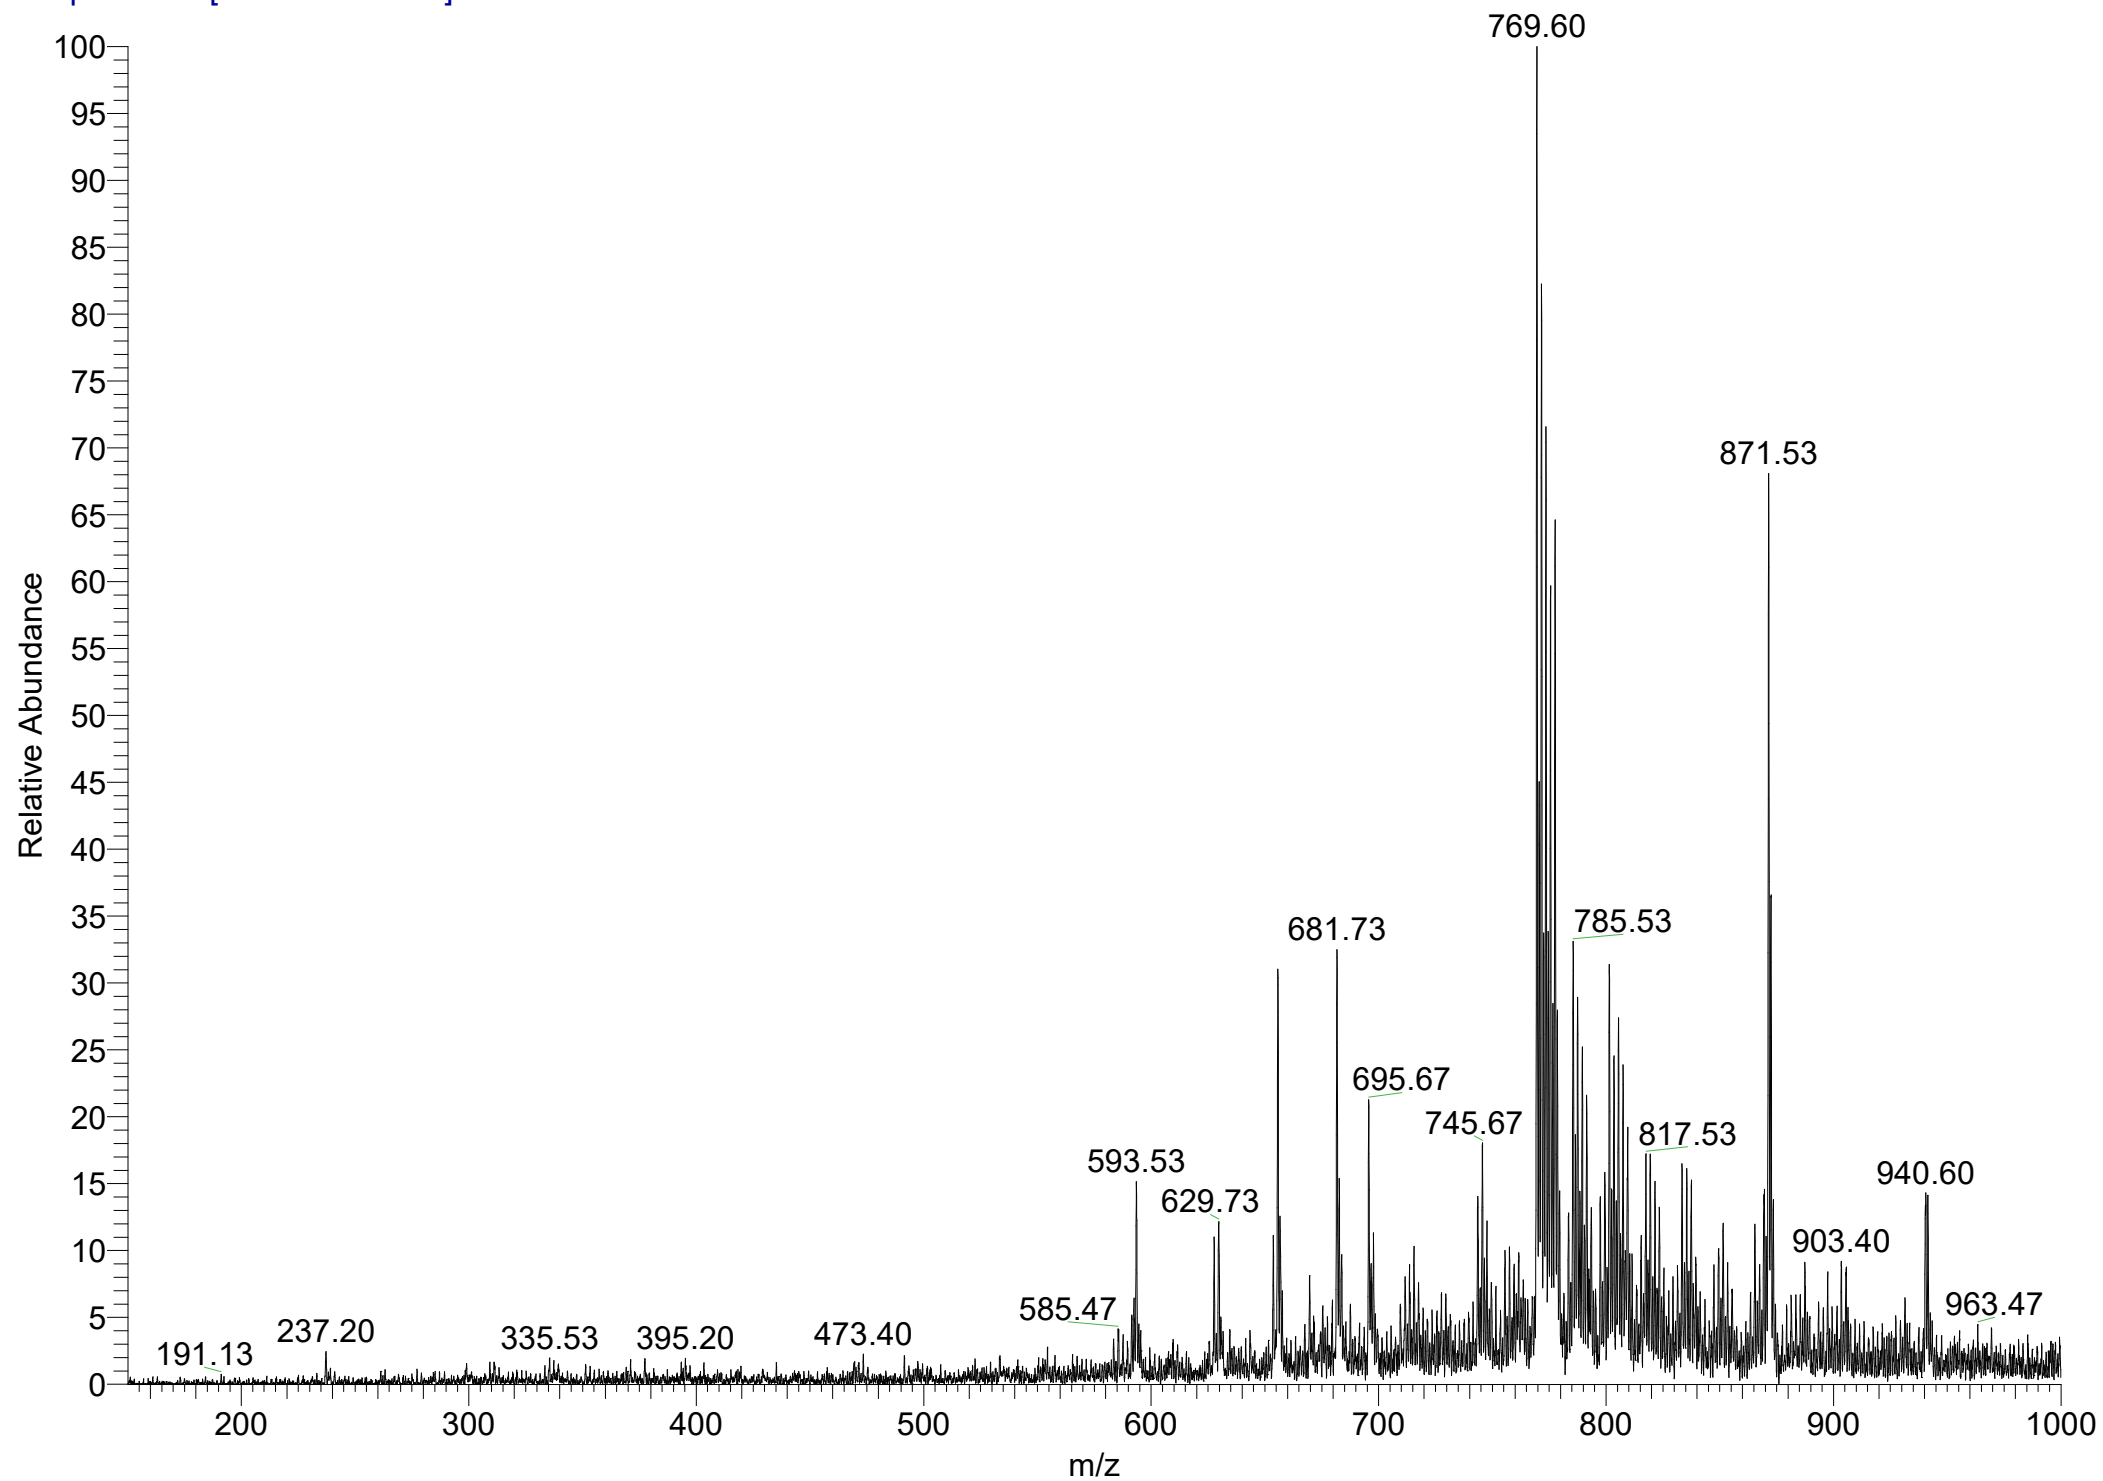



CH9 #1-50 RT: 0.01-0.74 AV: 50 NL: 1.59E6

T: + p ESI ms [150.00-1000.00]

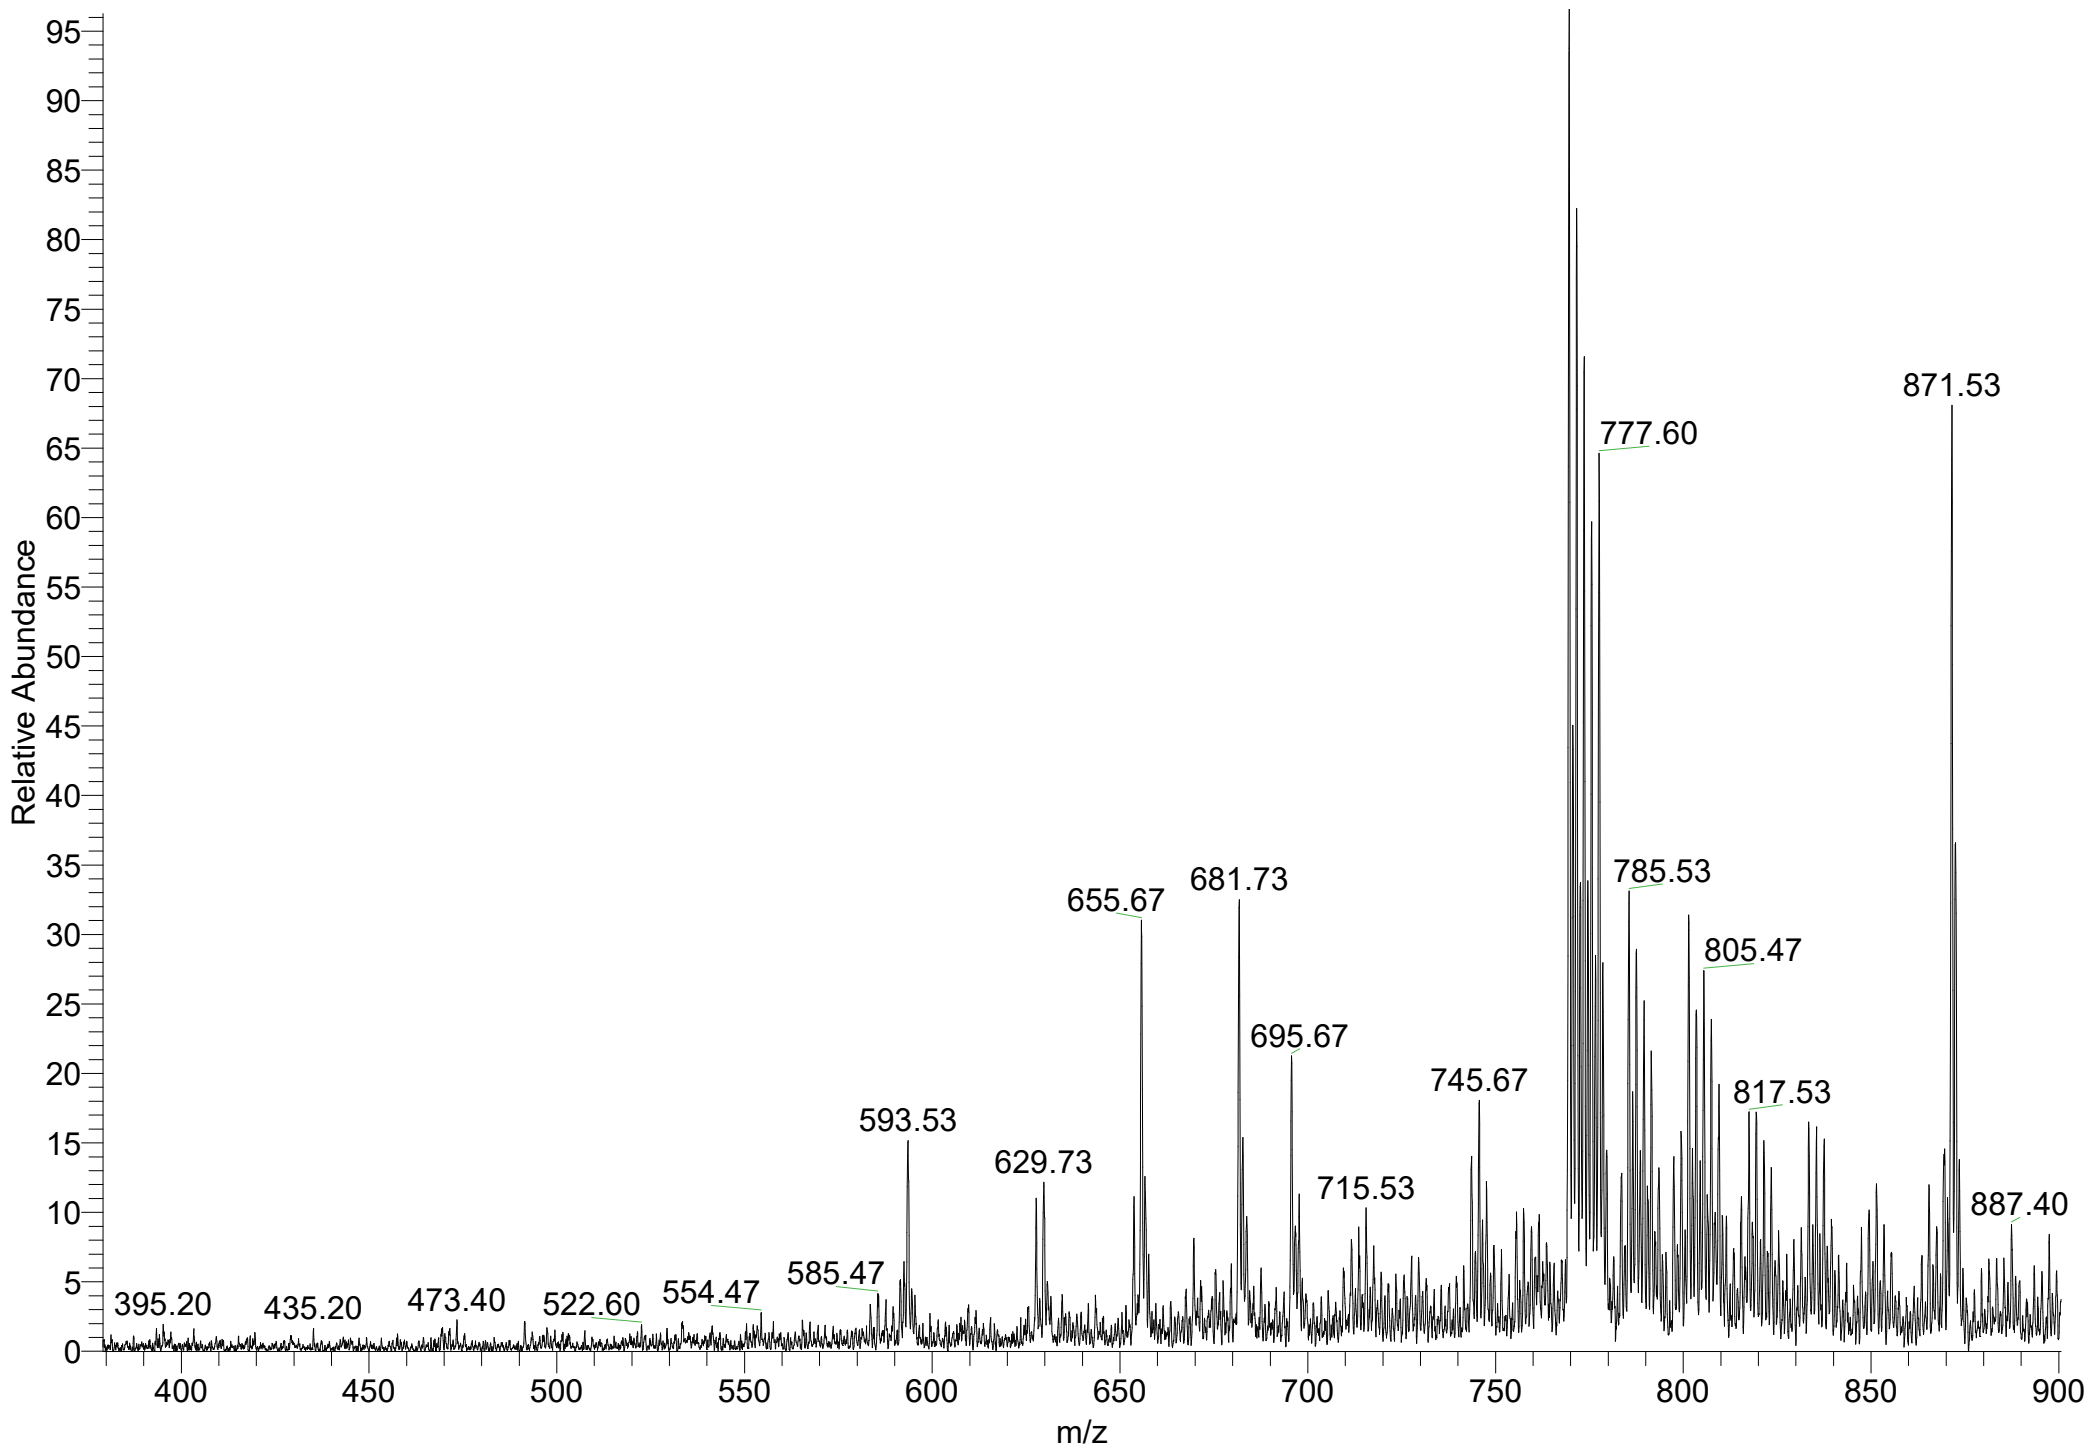

CH10 #1-50 RT: 0.00-0.74 AV: 50 NL: 2.55E5

T: + p ESI ms [150.00-1000.00]

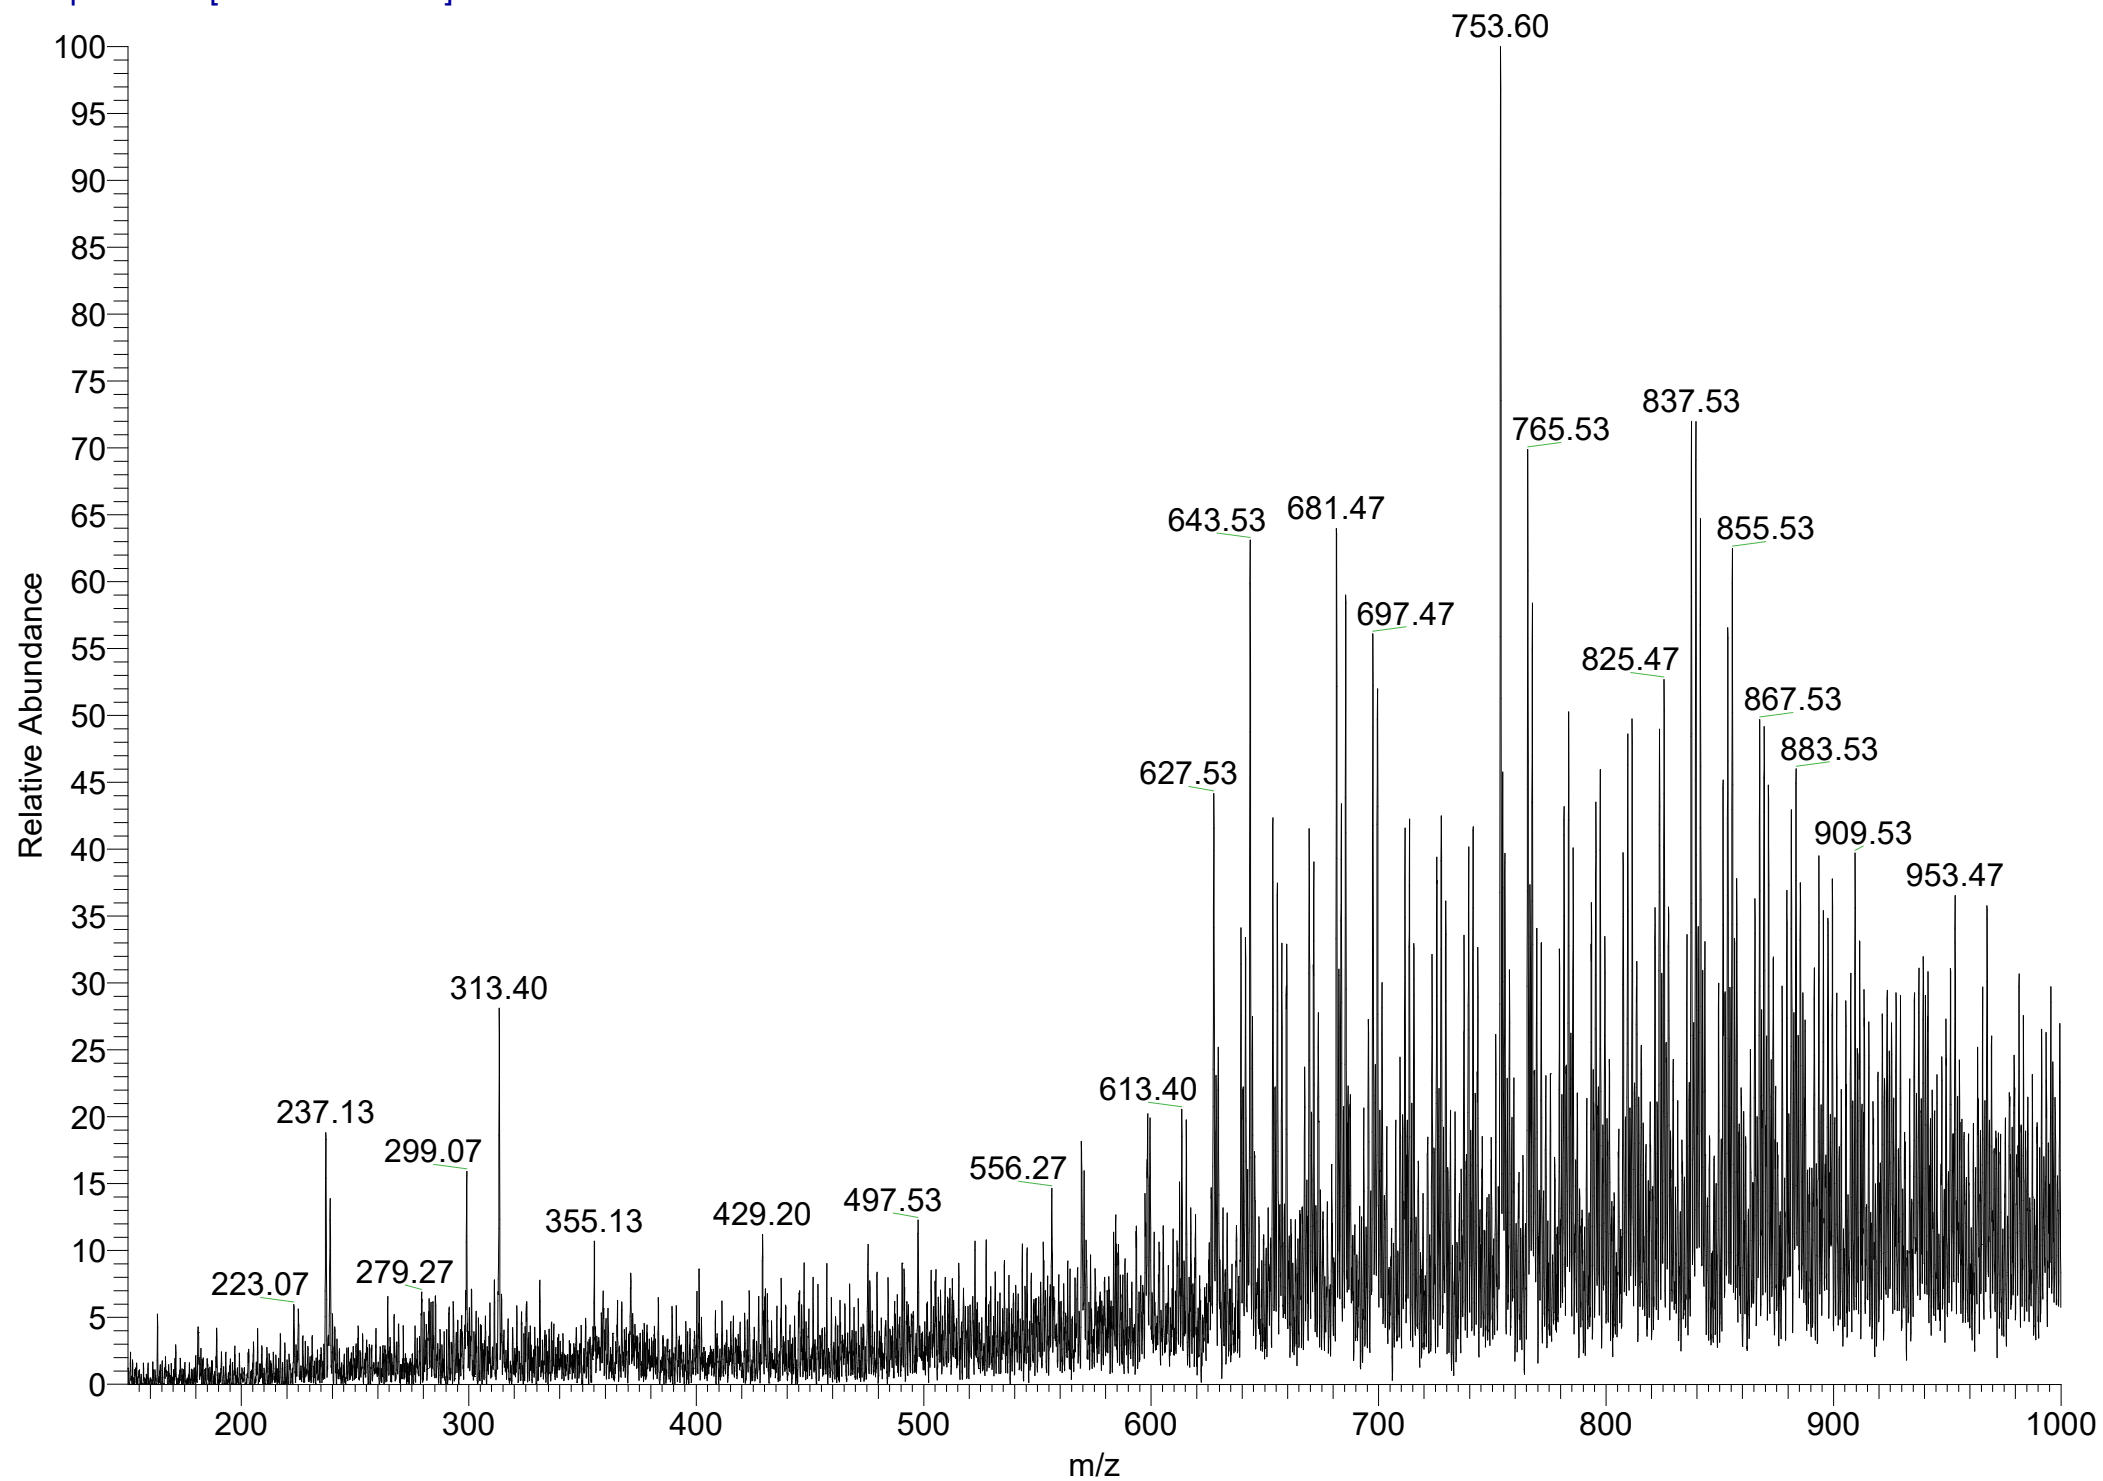

CH10 #1-50 RT: 0.00-0.74 AV: 50 NL: 2.55E5

T: + p ESI ms [150.00-1000.00]

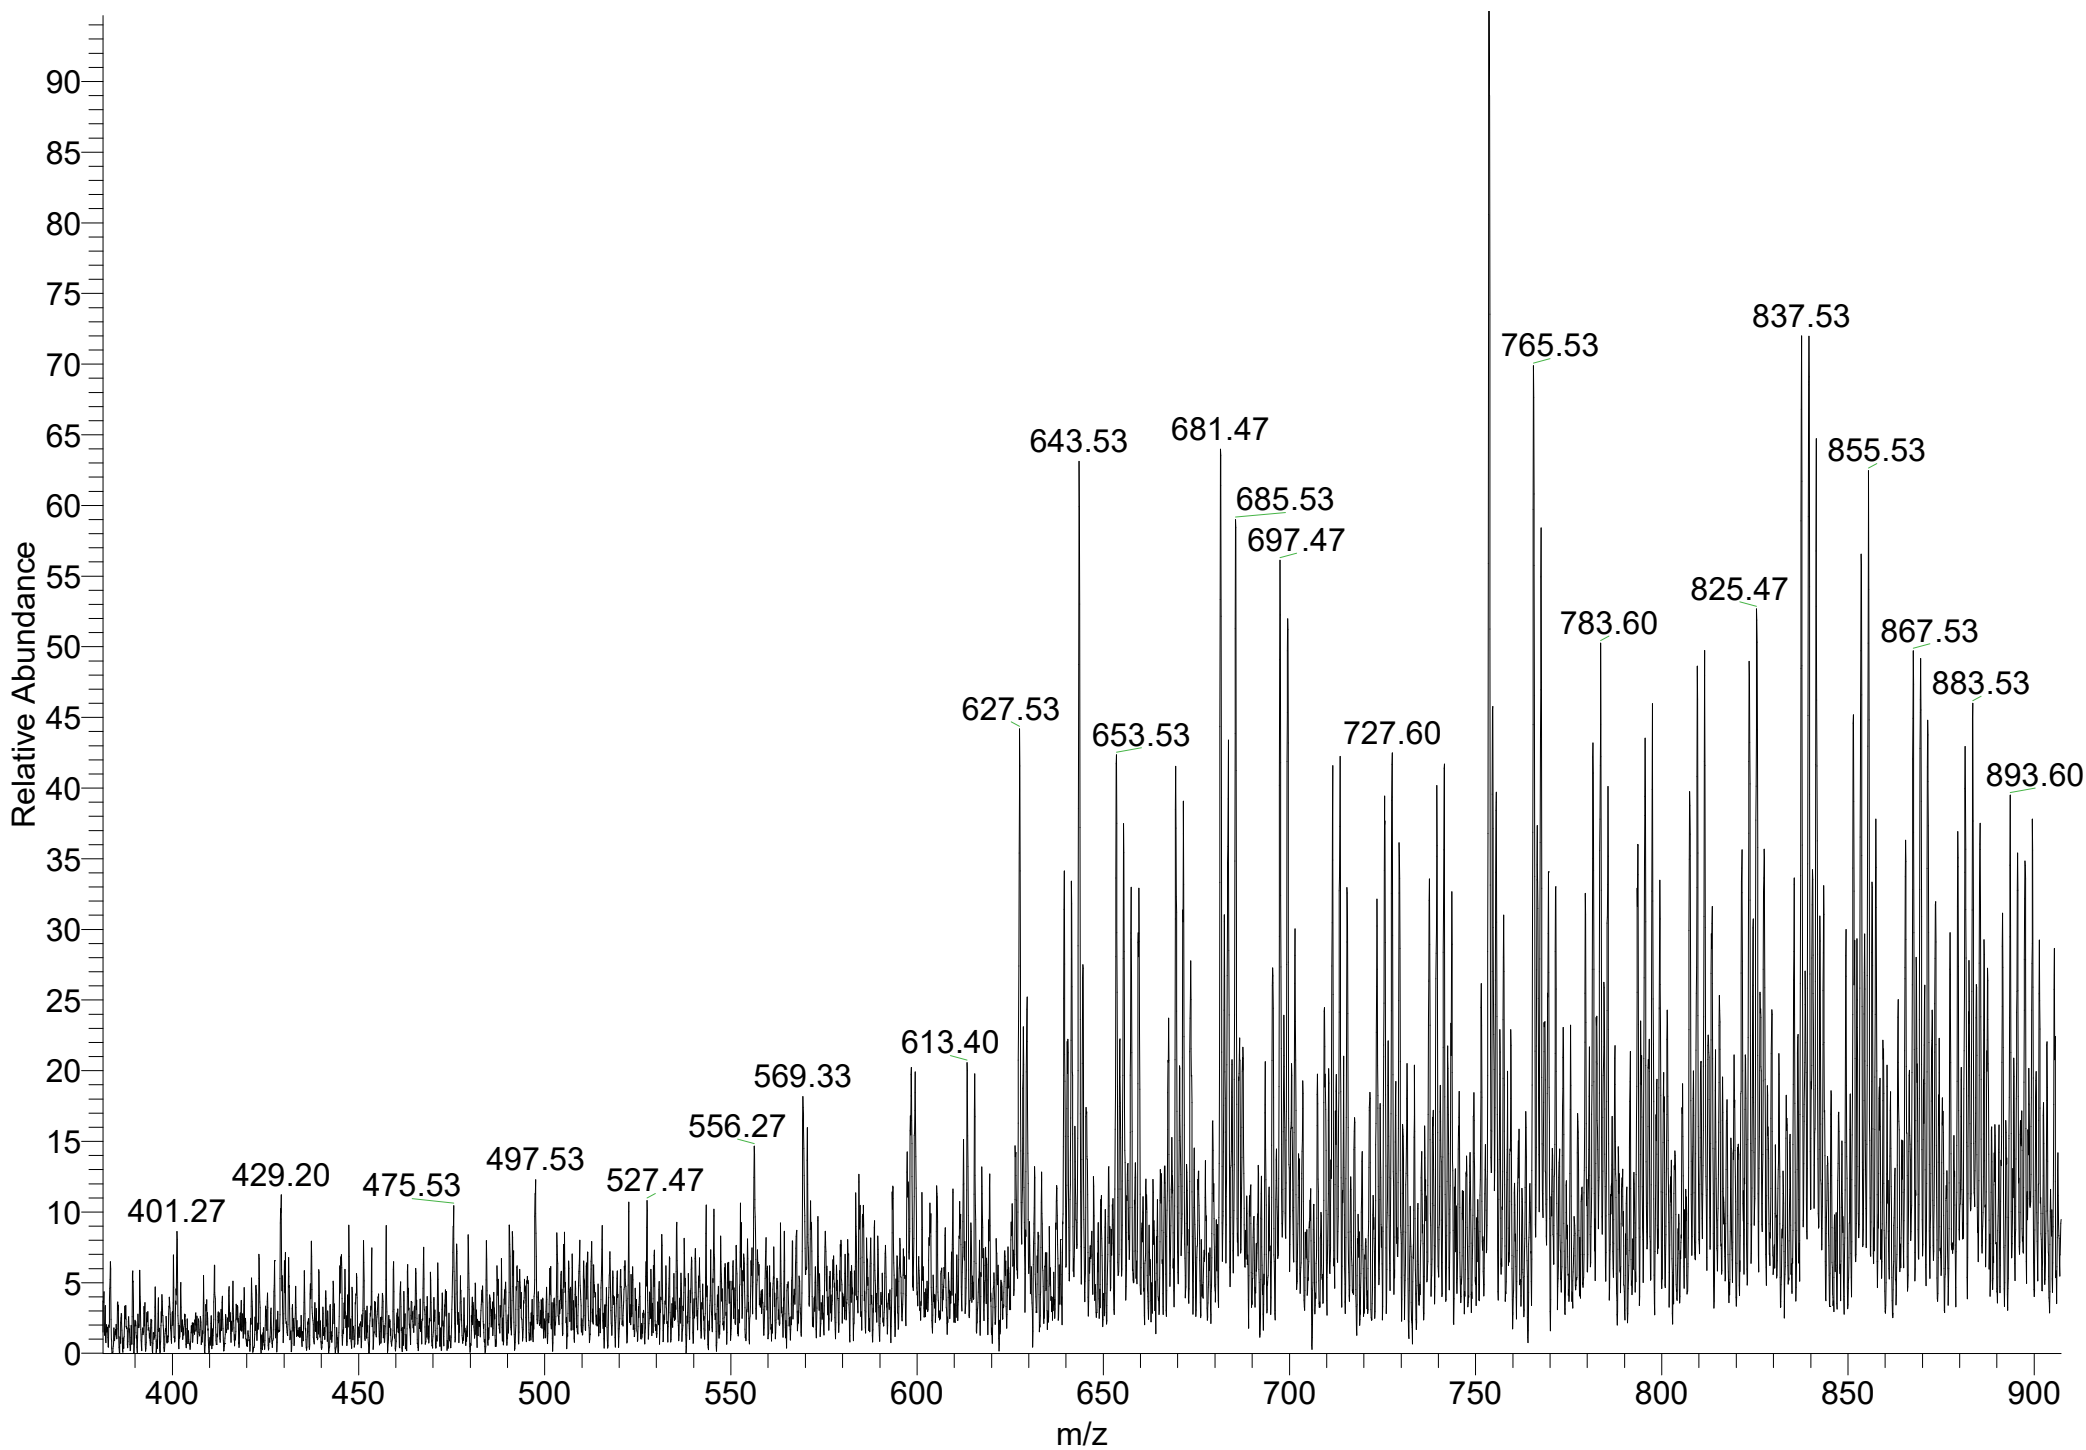

S1 #1-50 RT: 0.01-0.75 AV: 50 NL: 8.83E5

T: + p ESI ms [150.00-1000.00]

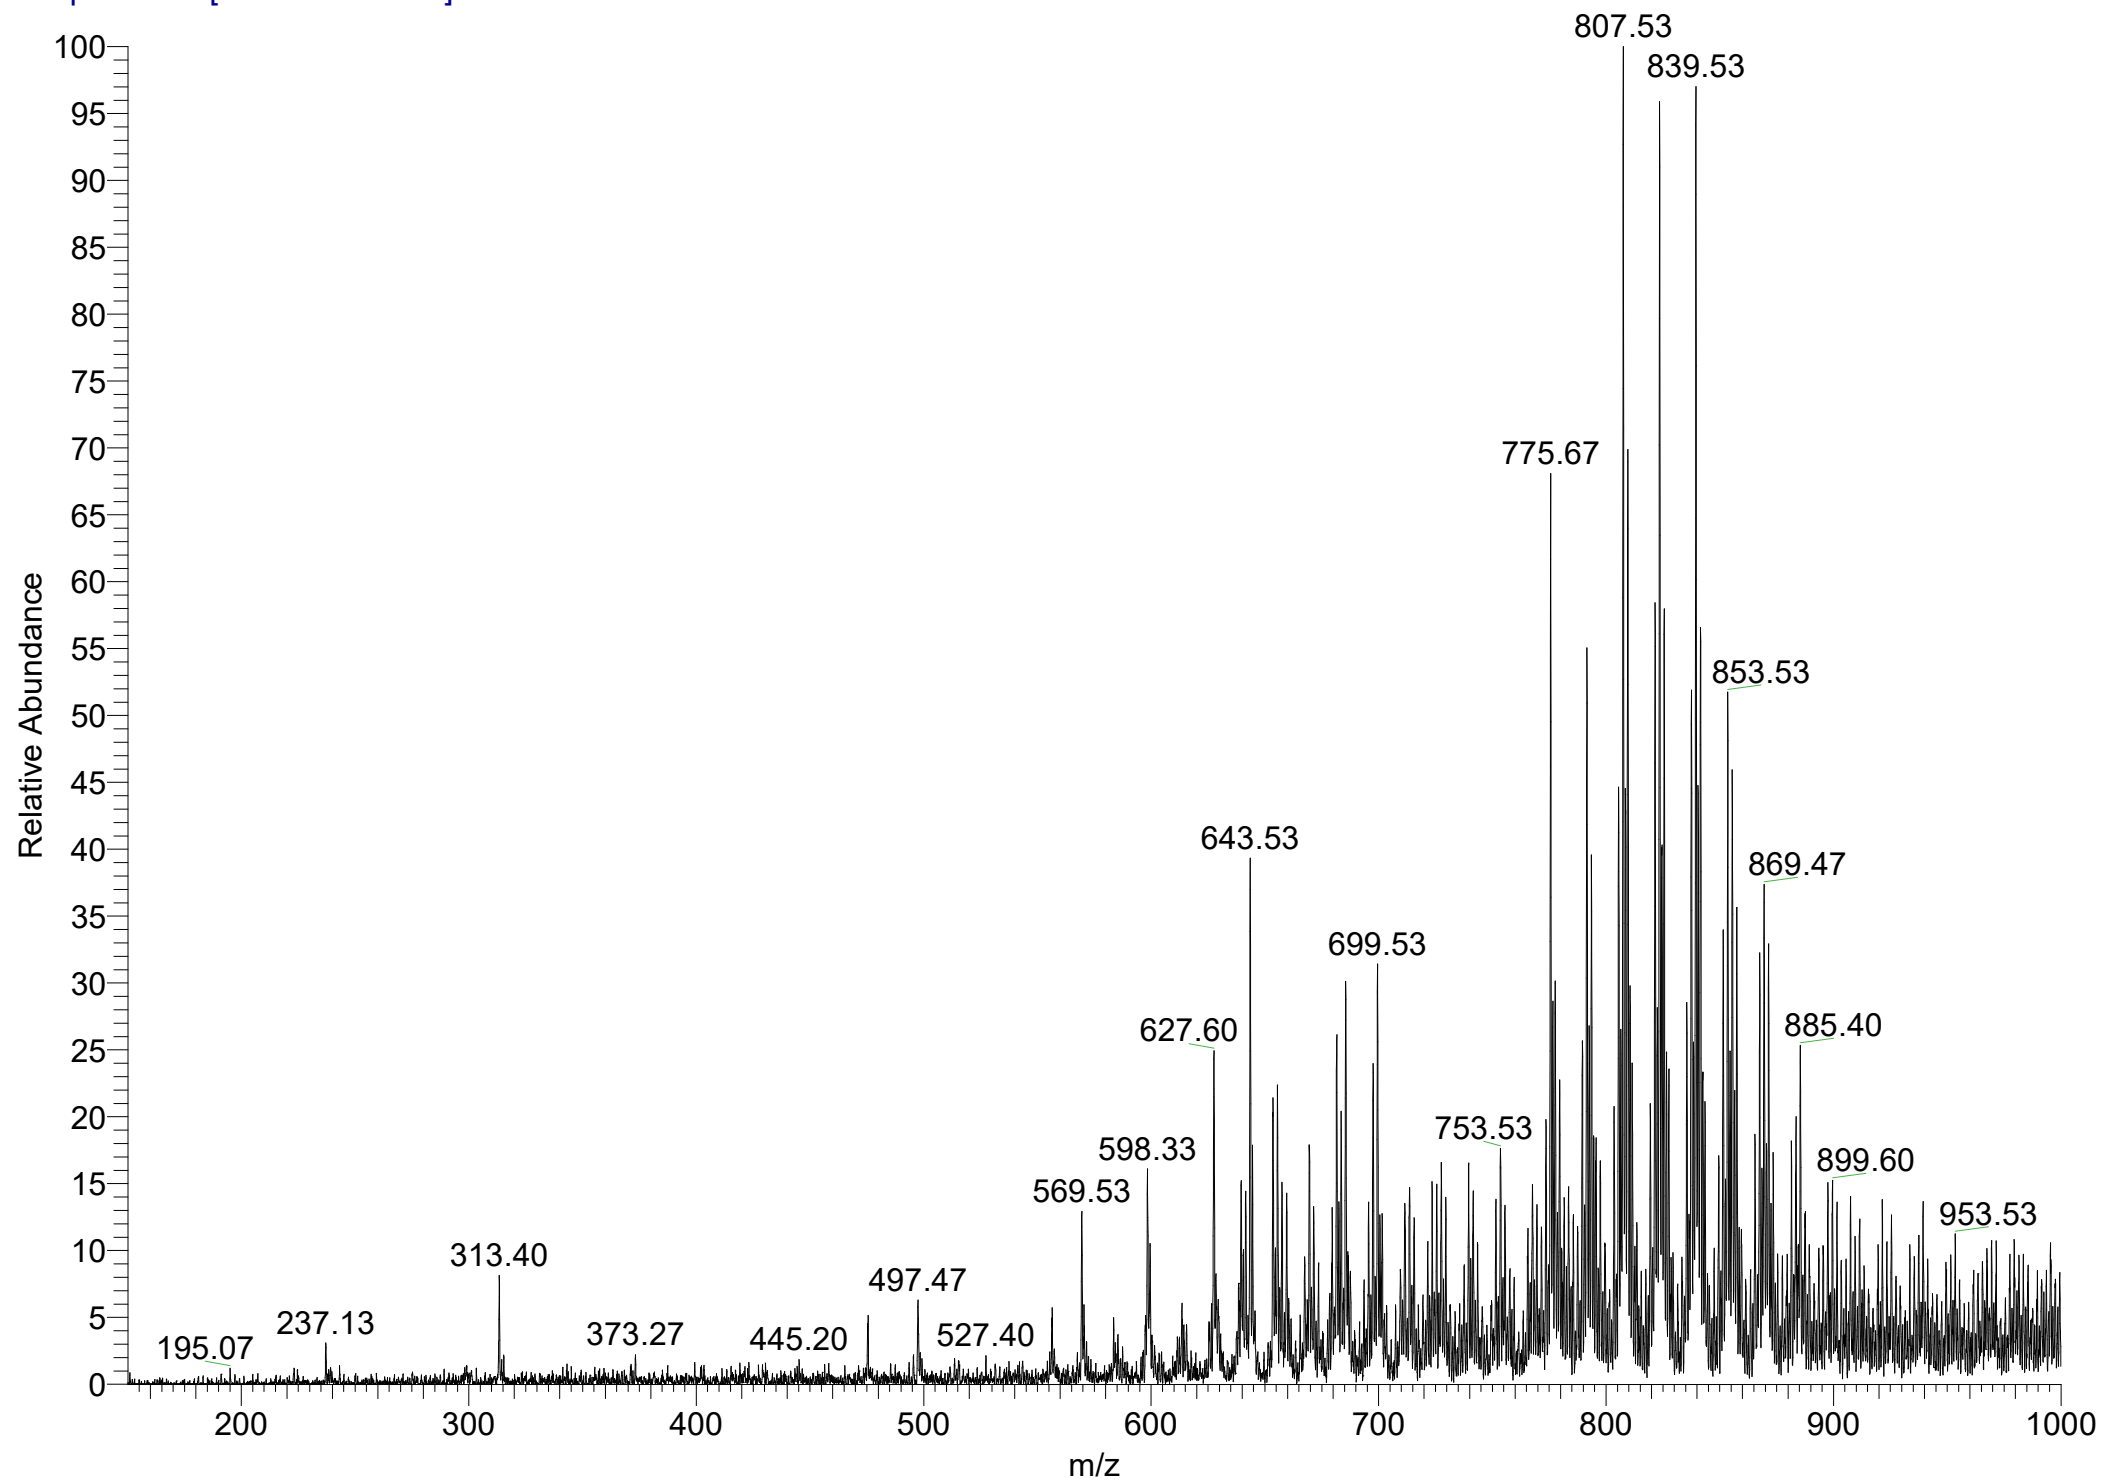

S1 #1-50 RT: 0.01-0.75 AV: 50 NL: 8.83E5

T: + p ESI ms [150.00-1000.00]

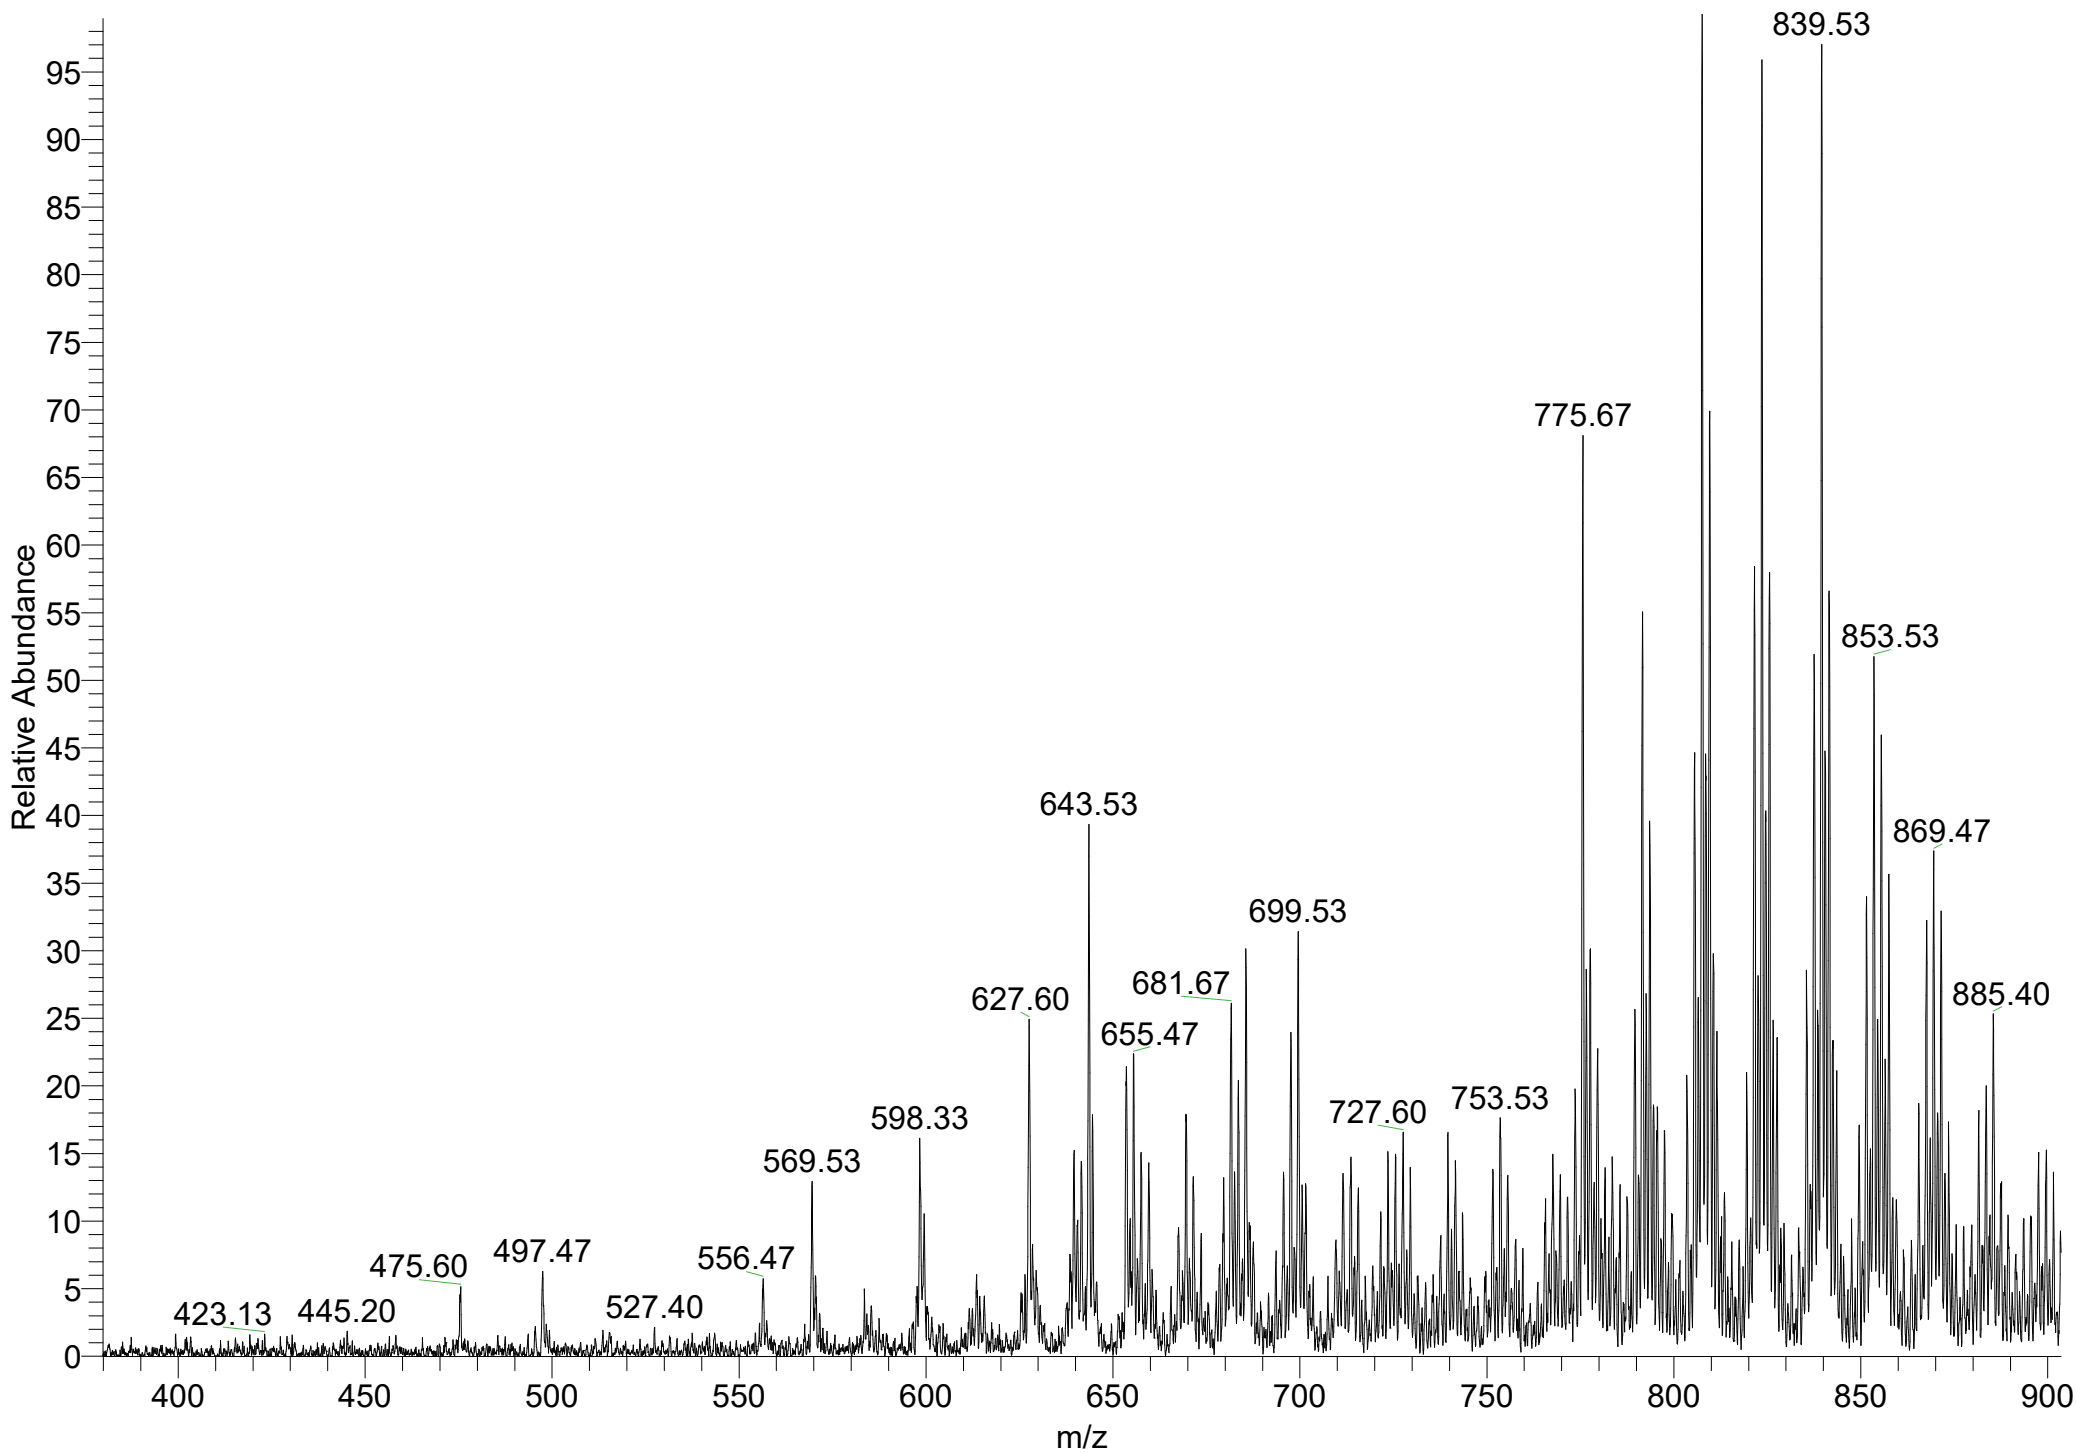

S2 #1-50 RT: 0.00-0.74 AV: 50 NL: 5.99E5

T: + p ESI ms [150.00-1000.00]

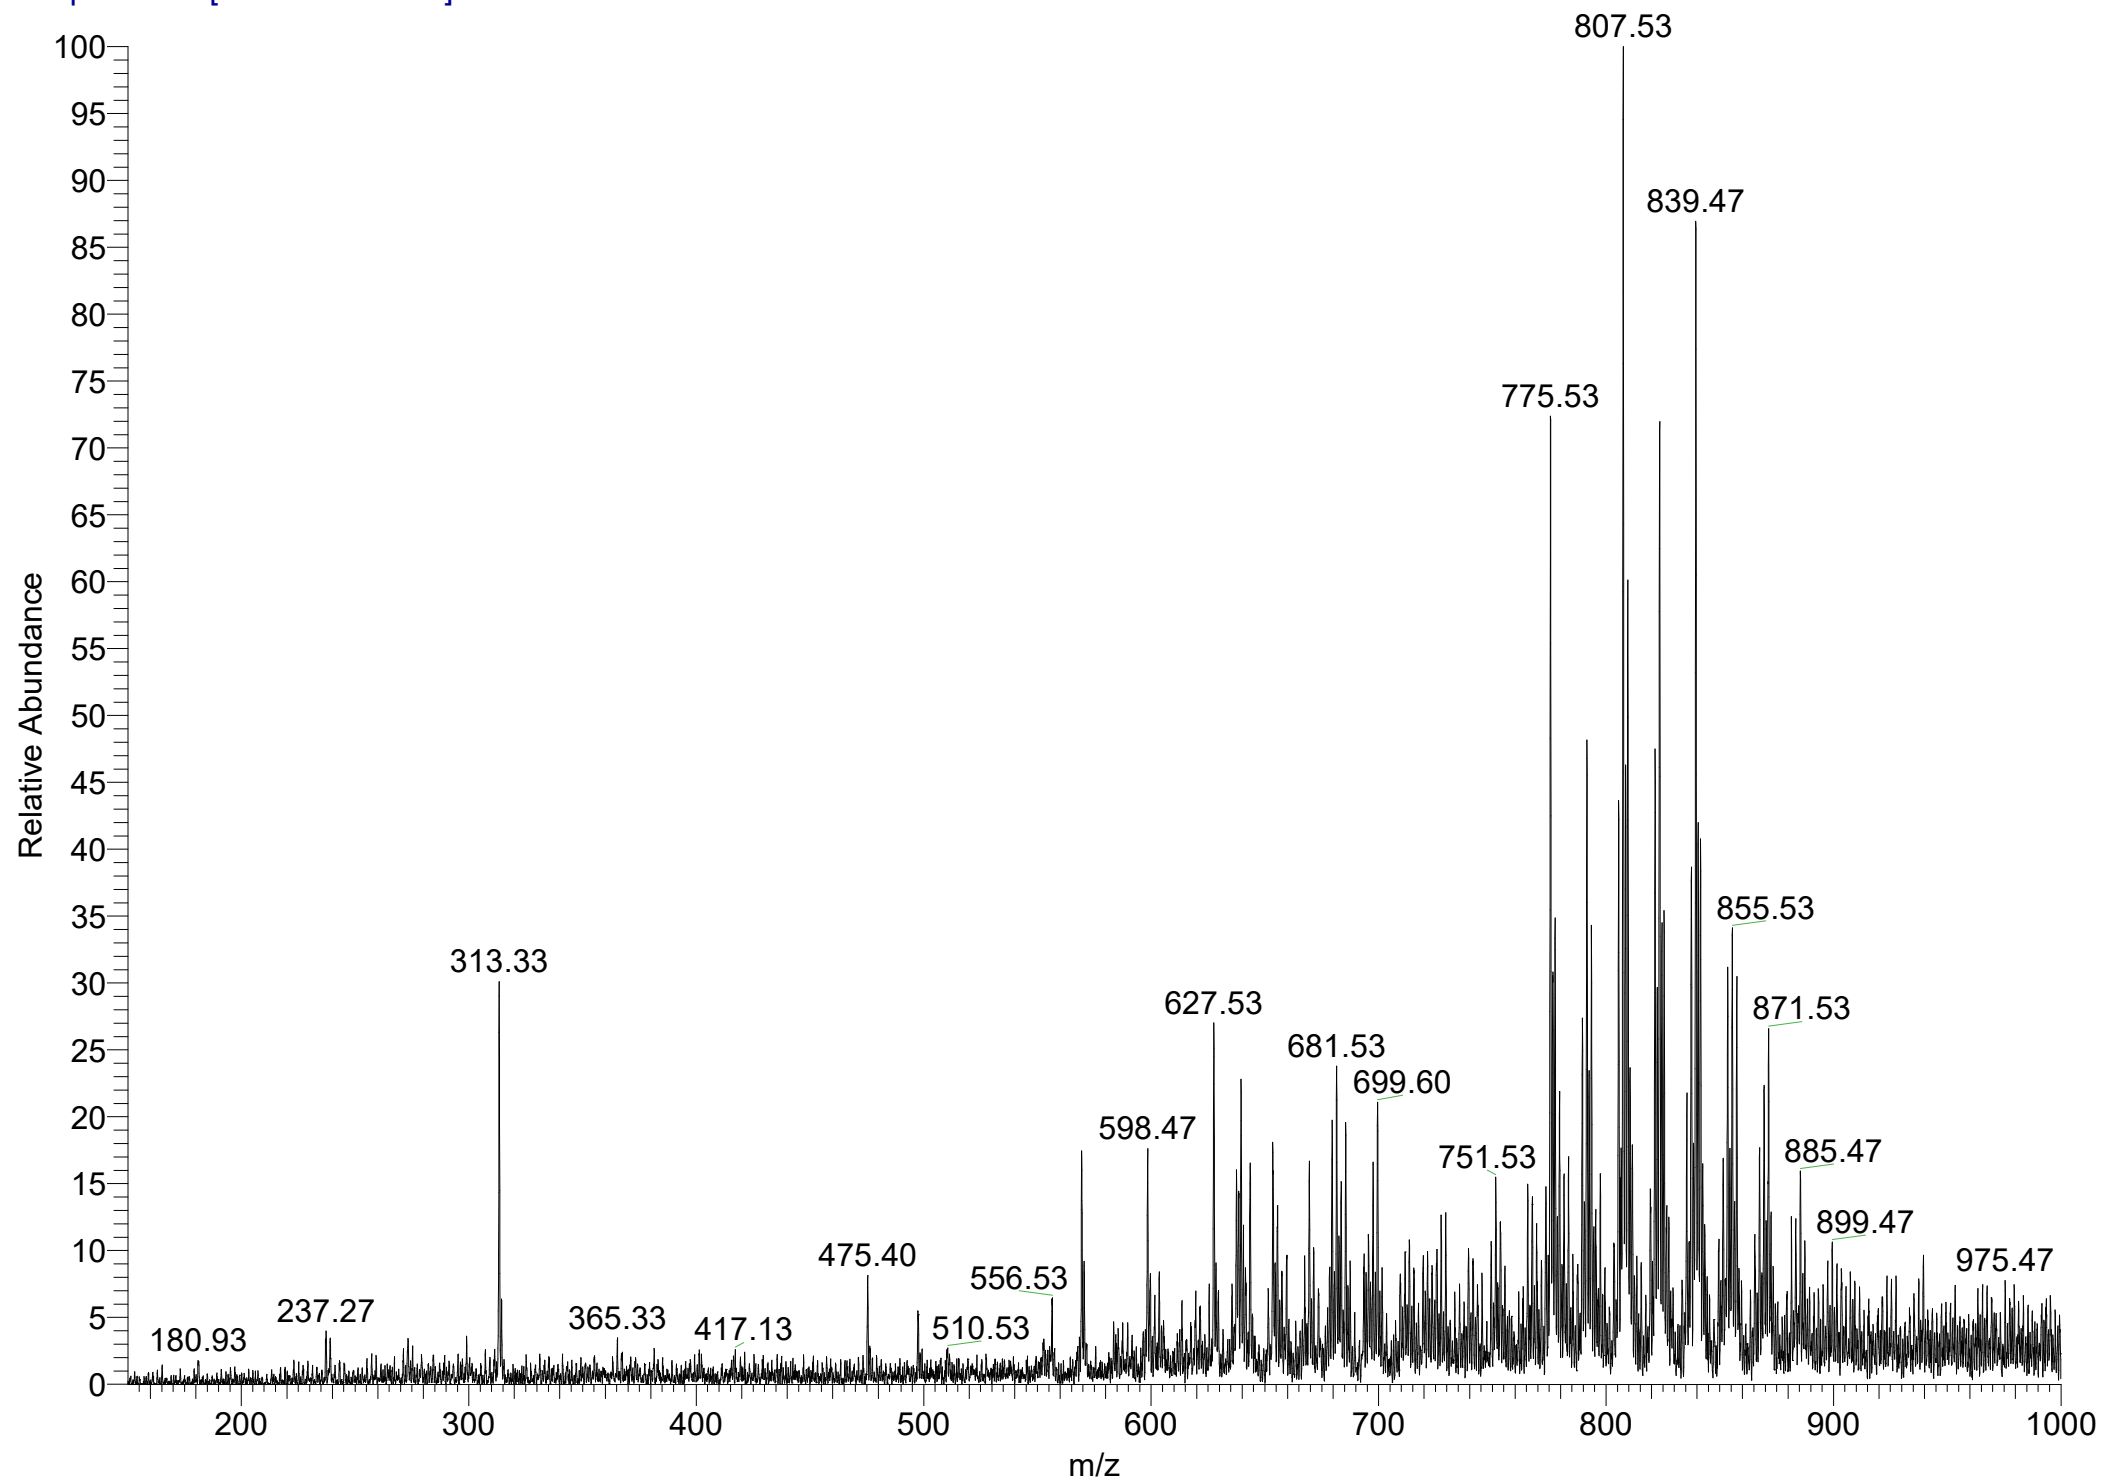

S2 #1-50 RT: 0.00-0.74 AV: 50 NL: 5.99E5

T: + p ESI ms [150.00-1000.00]

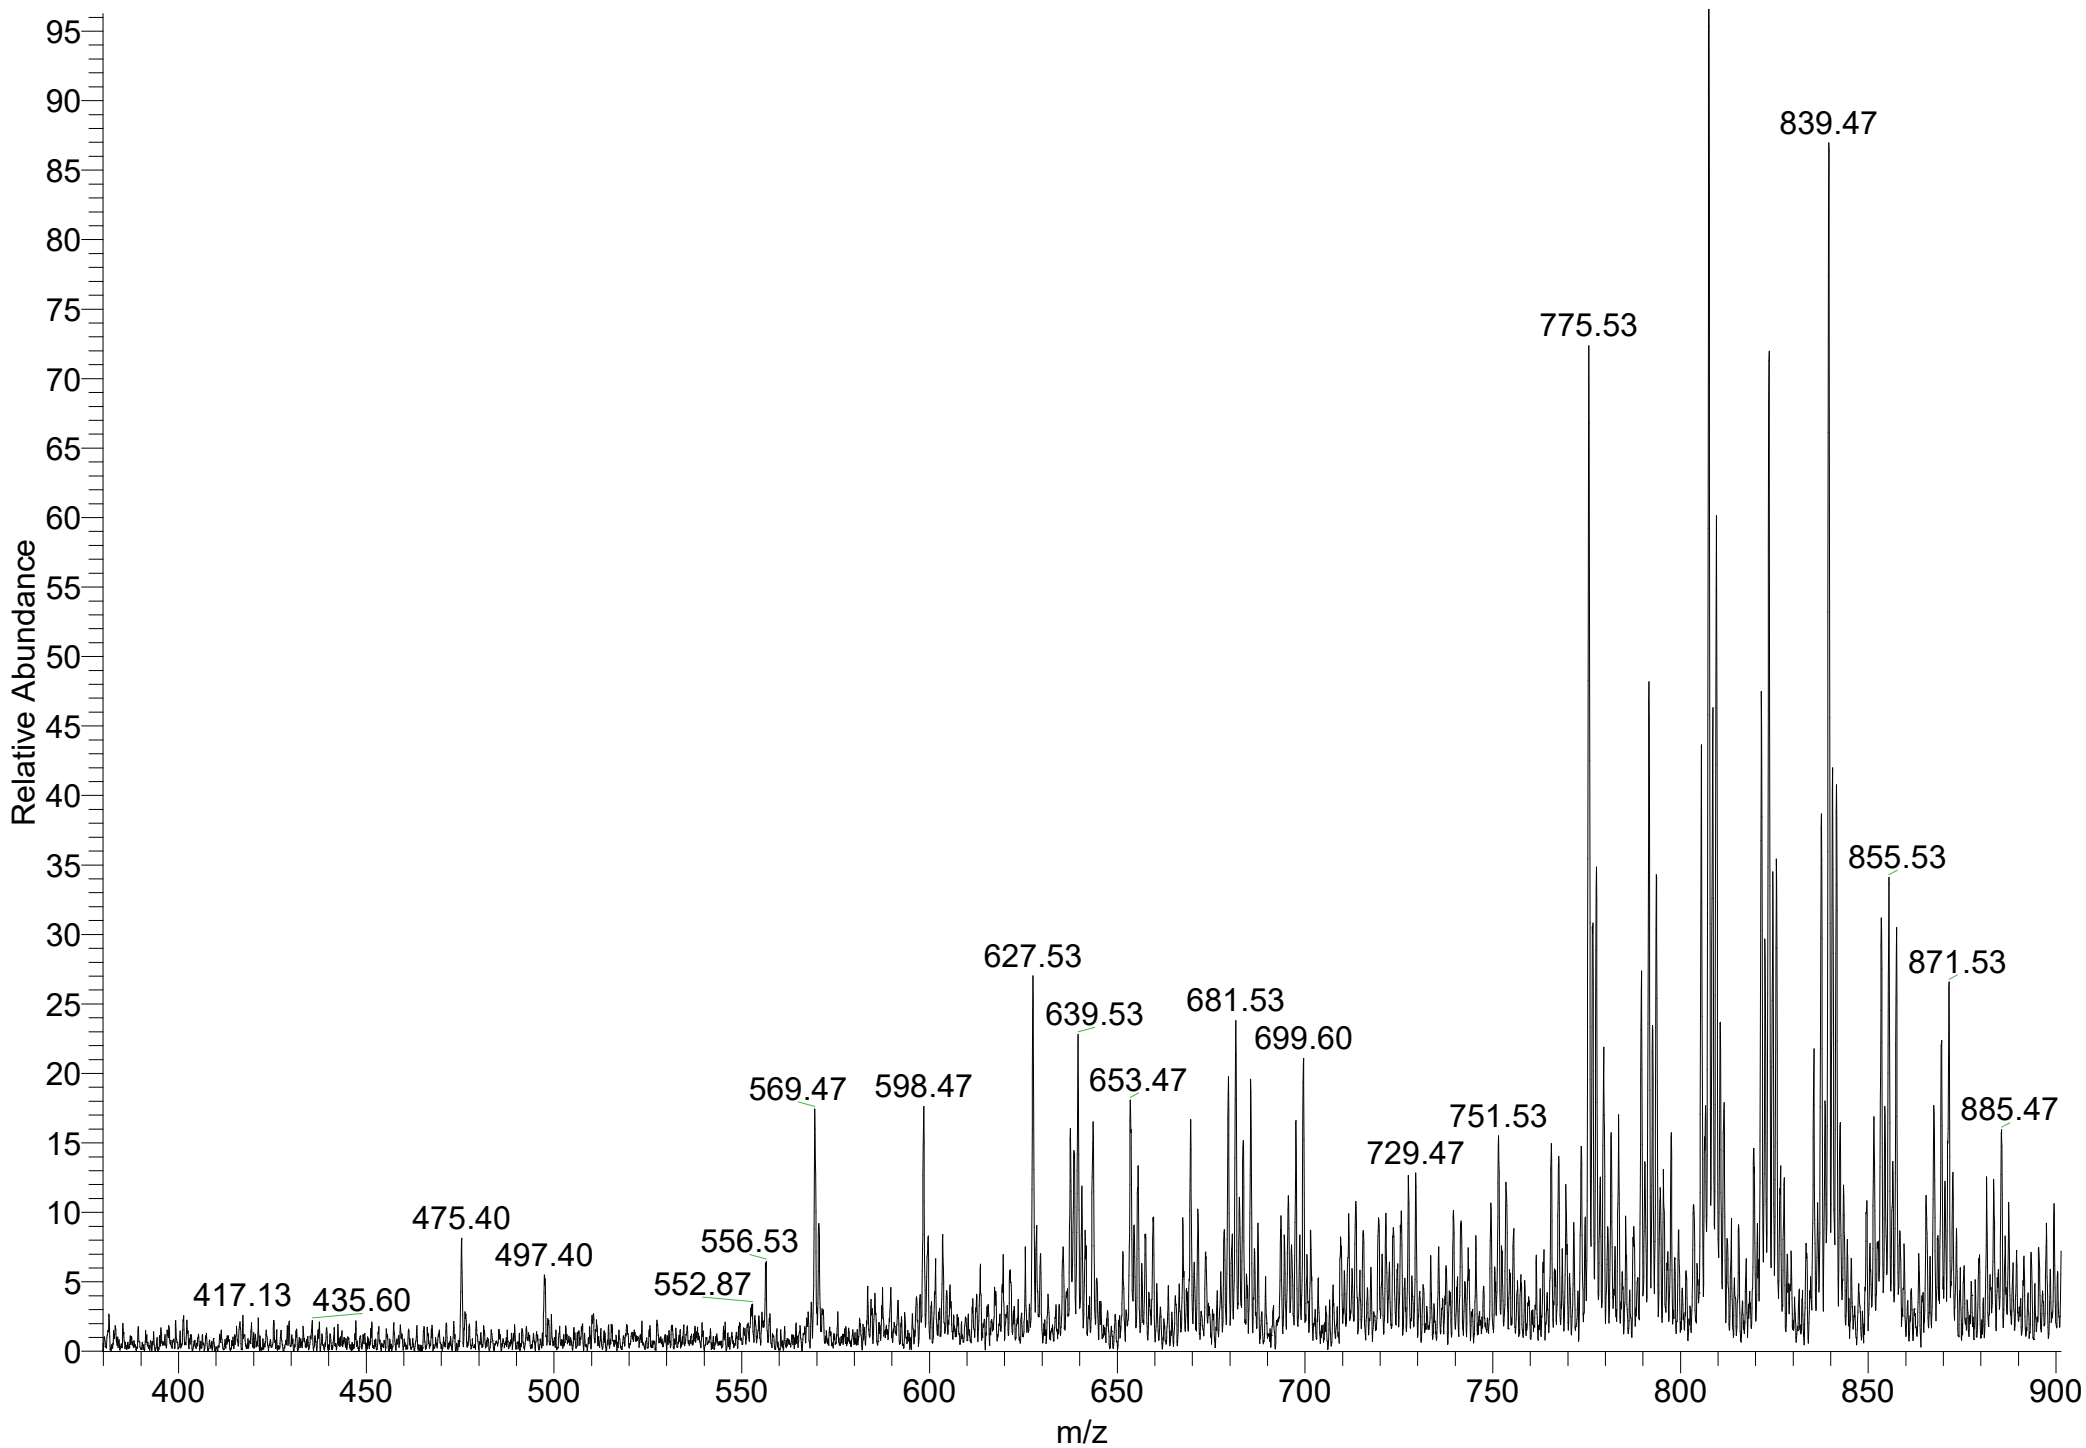

S3 #1-50 RT: 0.01-0.74 AV: 50 NL: 9.38E5

T: + p ESI ms [150.00-1000.00]

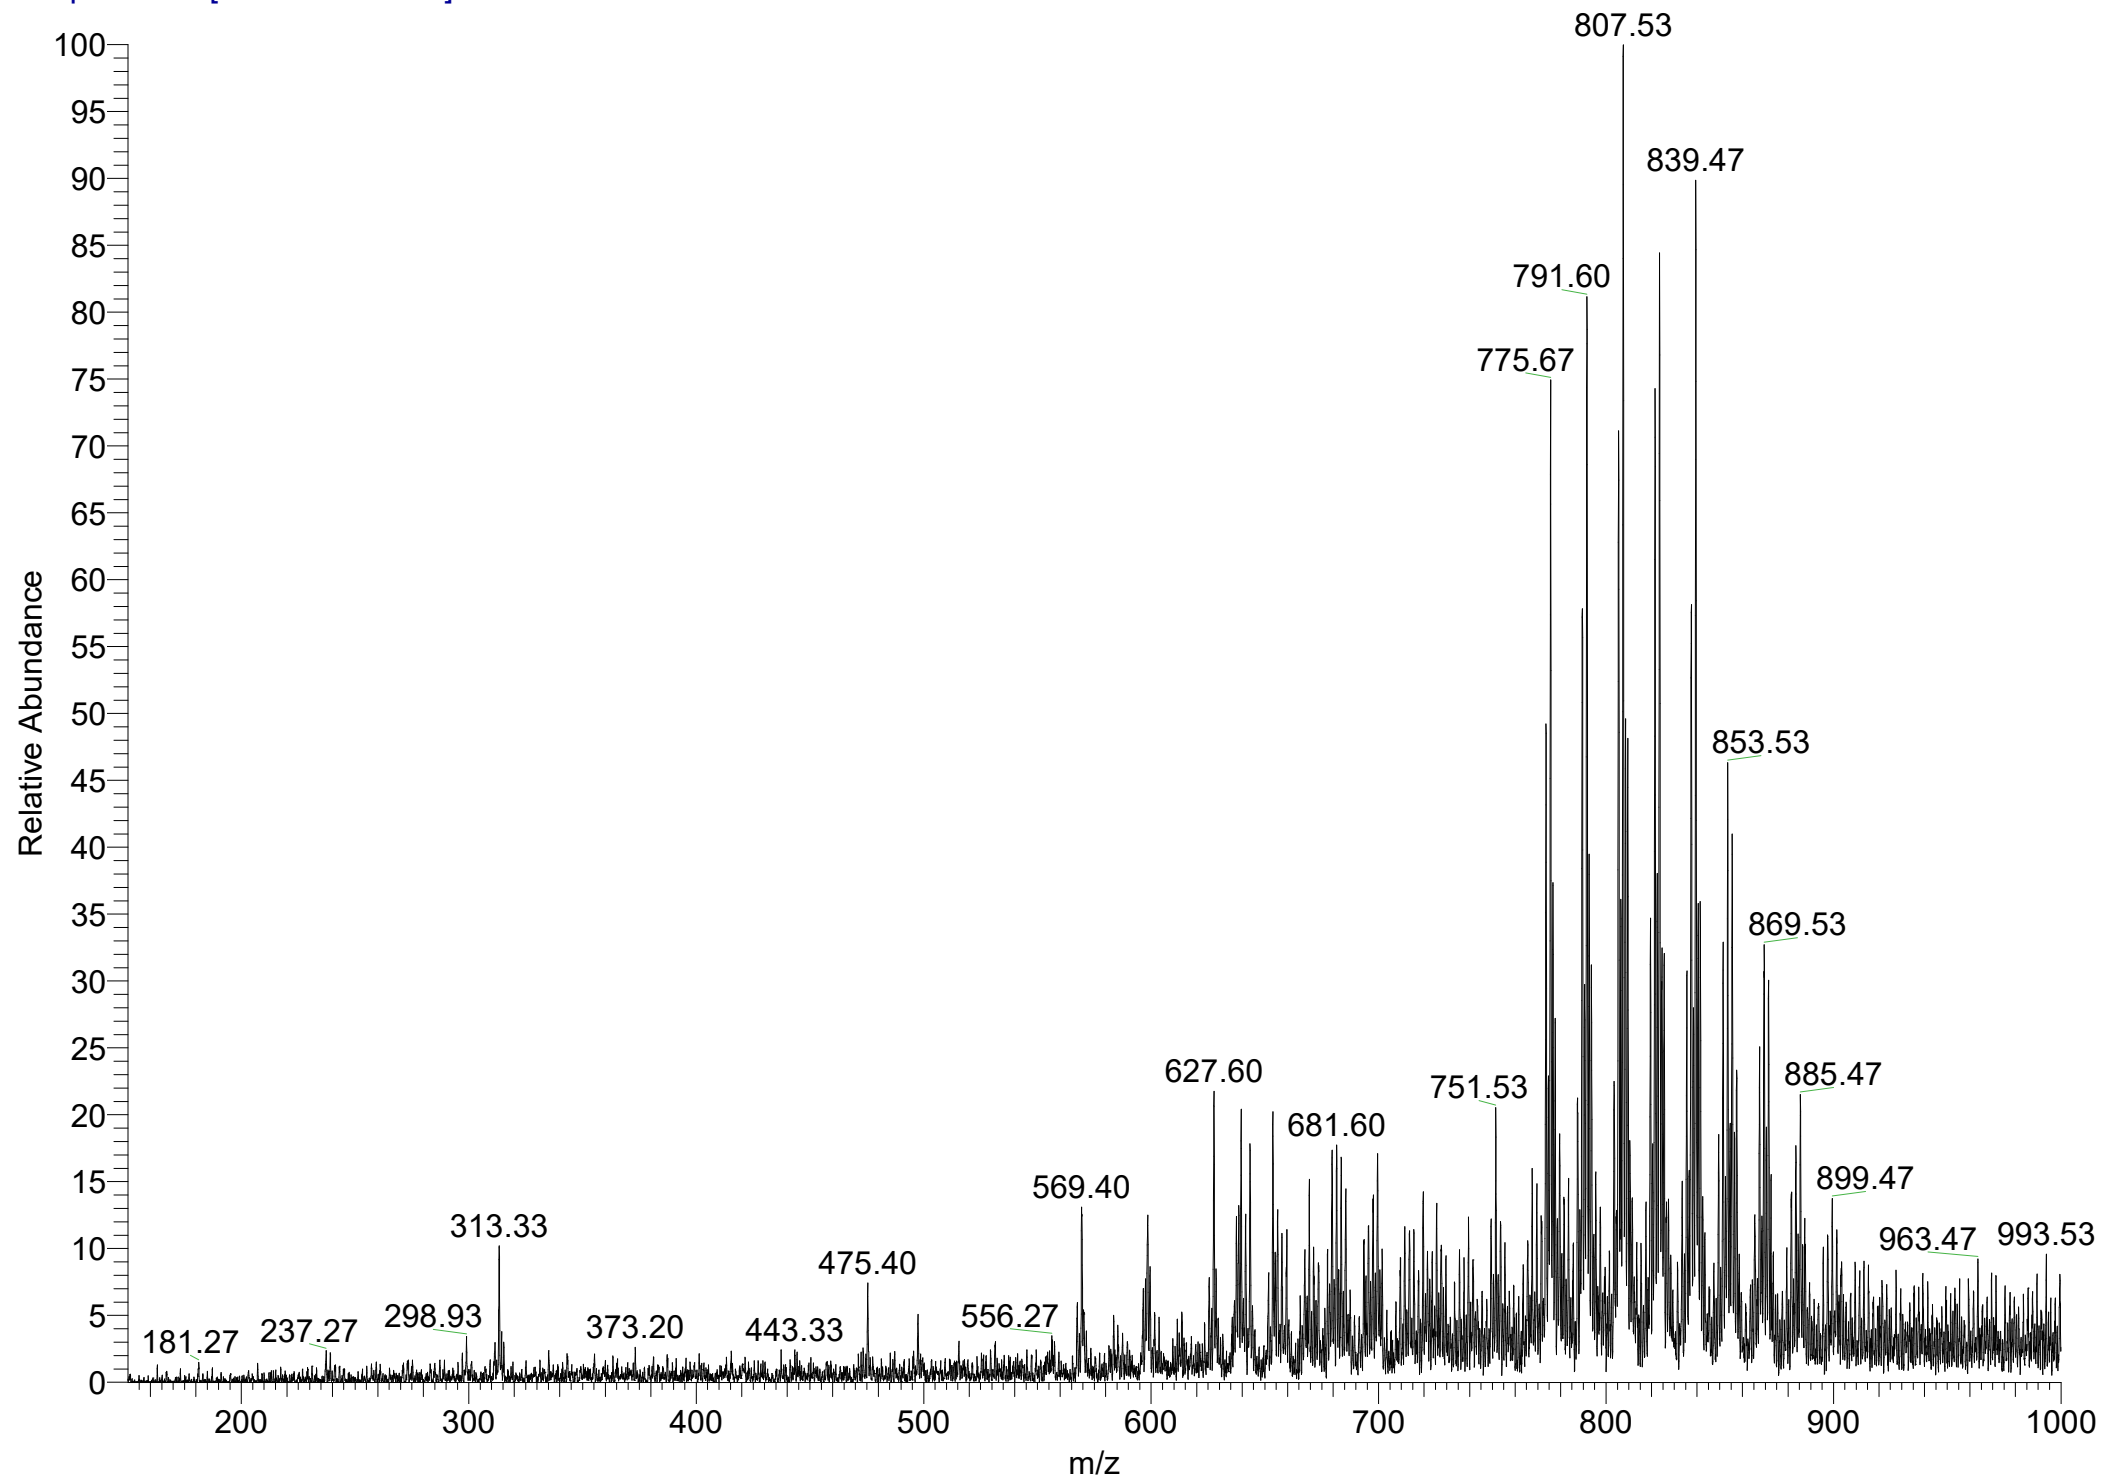



S3 #1-50 RT: 0.01-0.74 AV: 50 NL: 9.38E5

T: + p ESI ms [150.00-1000.00]

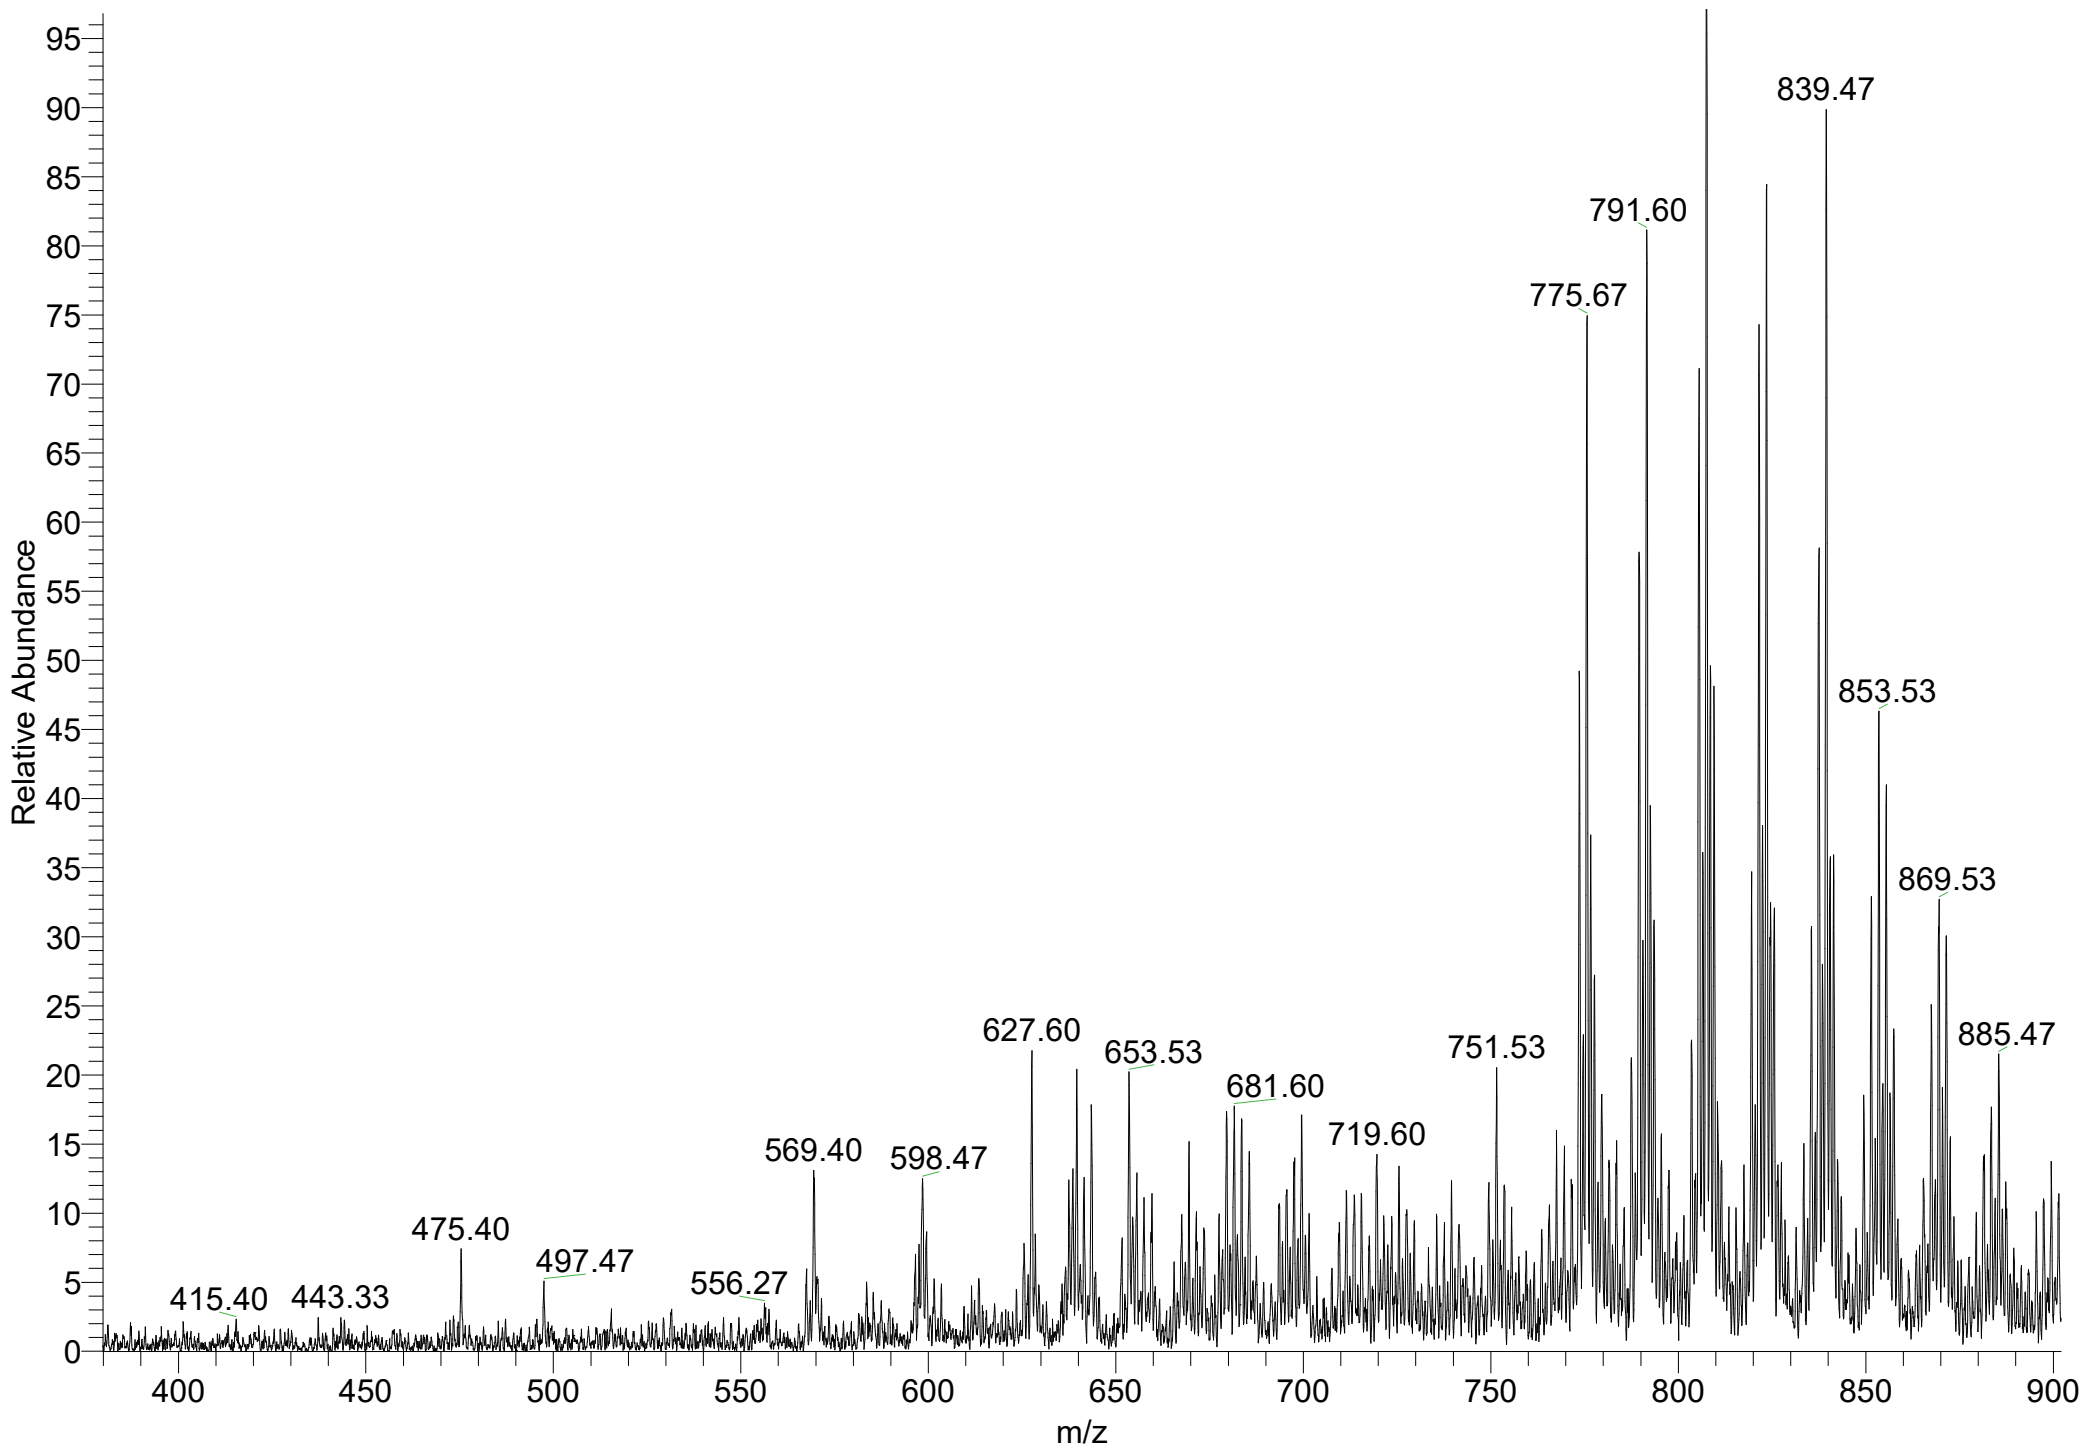

S4 #1-50 RT: 0.01-0.75 AV: 50 NL: 1.19E6

T: + p ESI ms [150.00-1000.00]

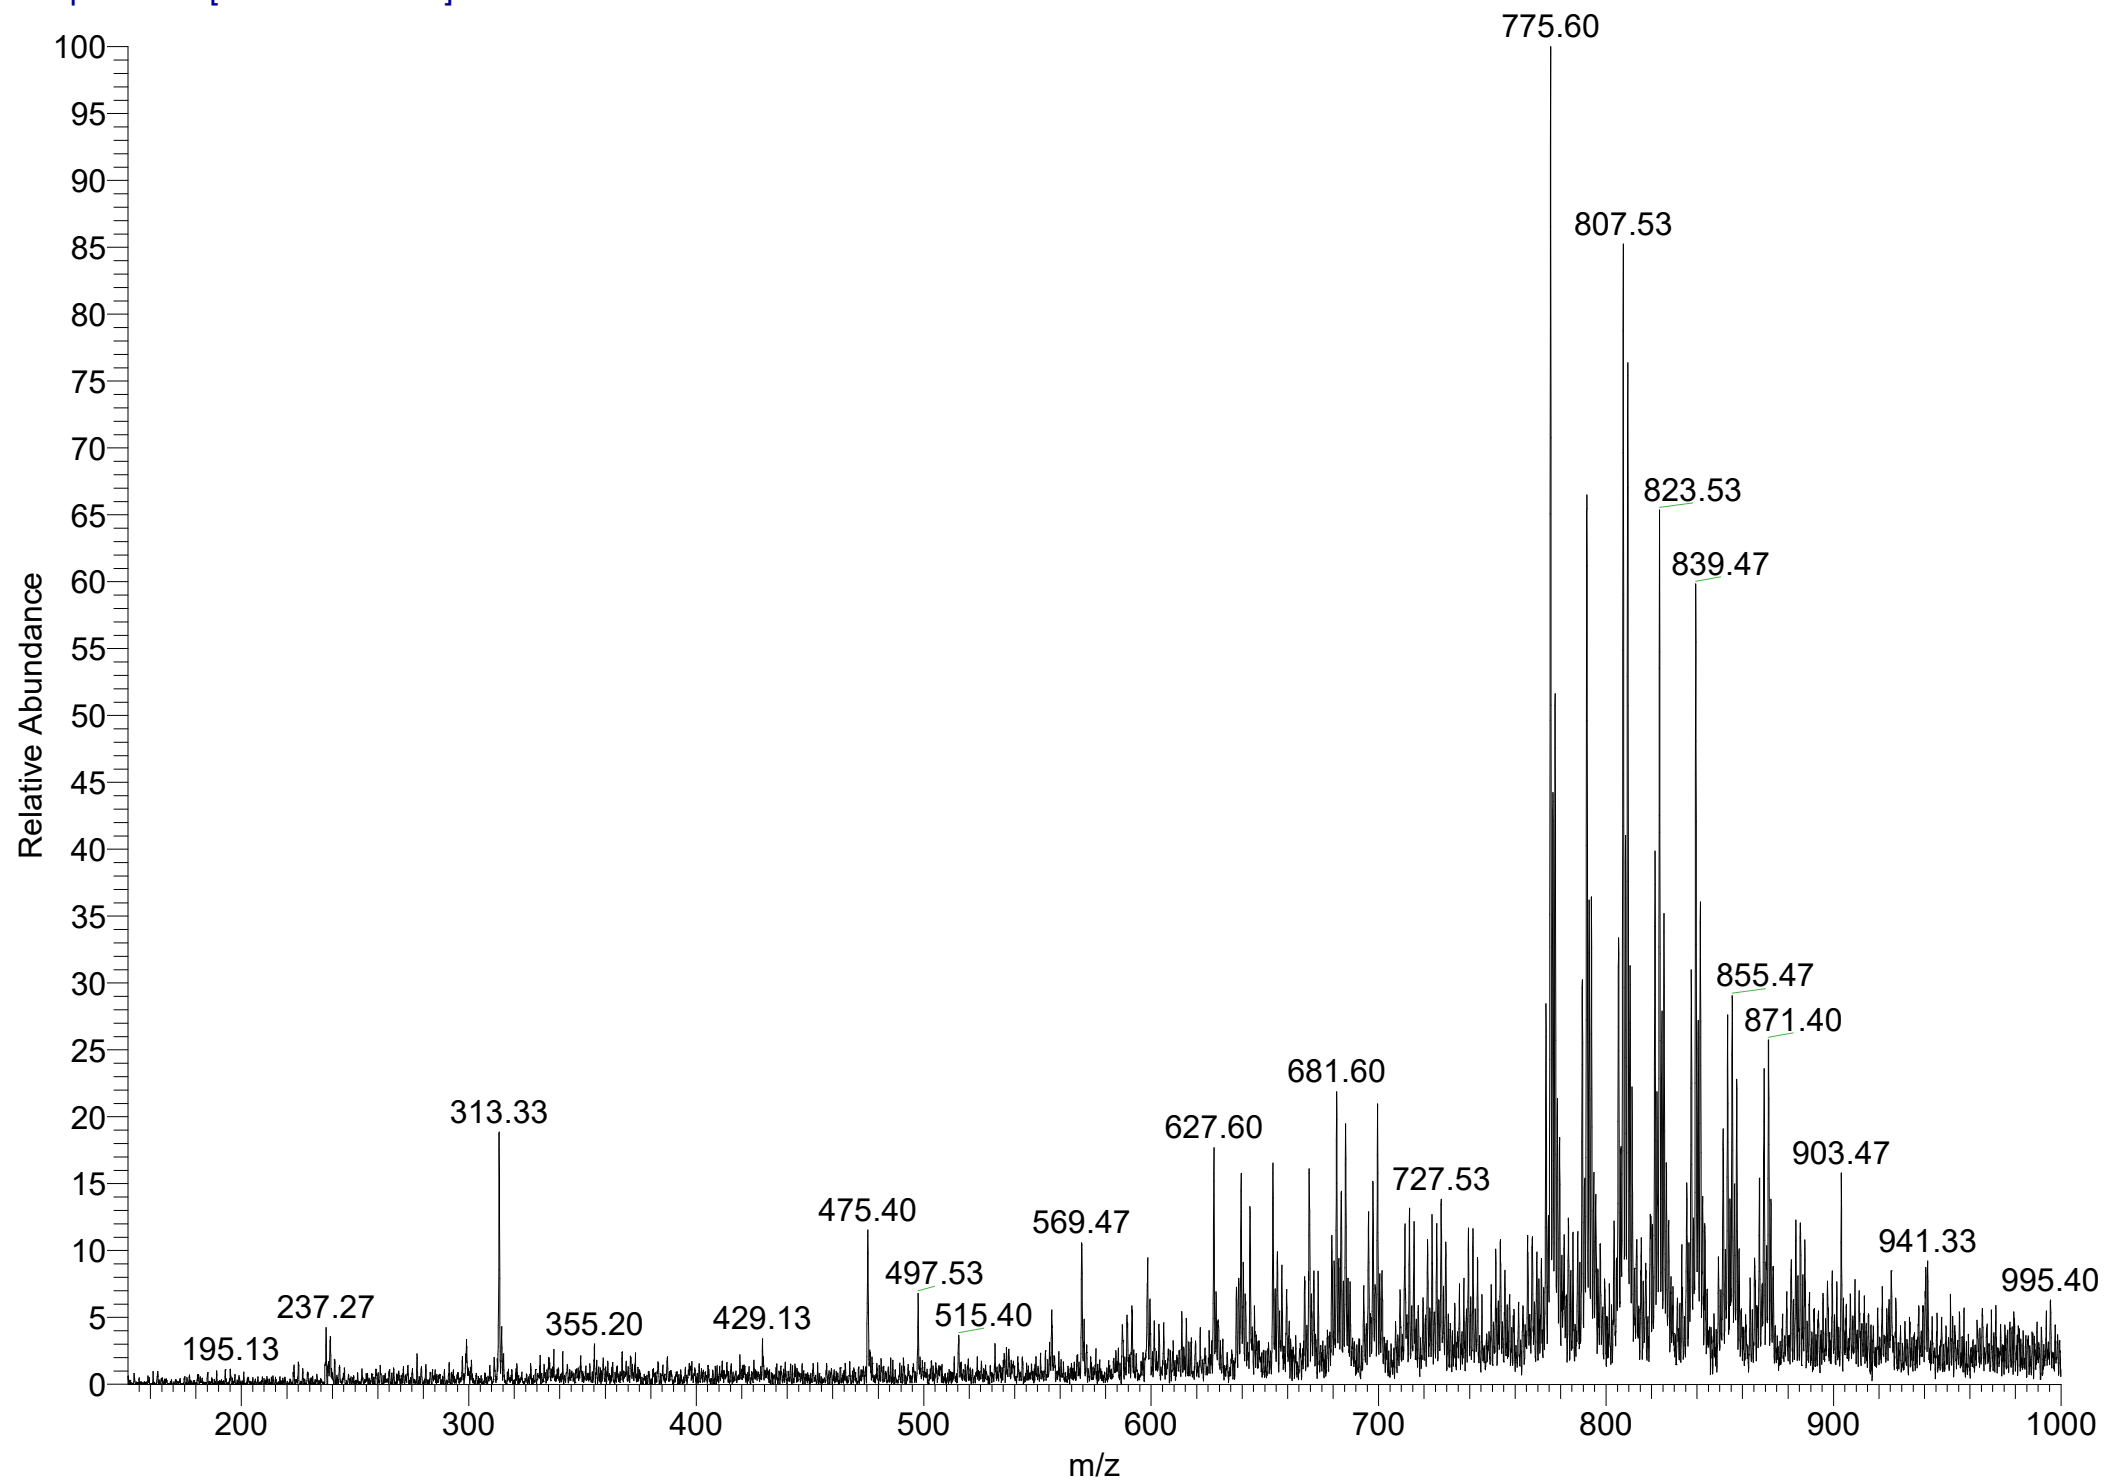

S4 #1-50 RT: 0.01-0.75 AV: 50 NL: 1.19E6

T: + p ESI ms [150.00-1000.00]

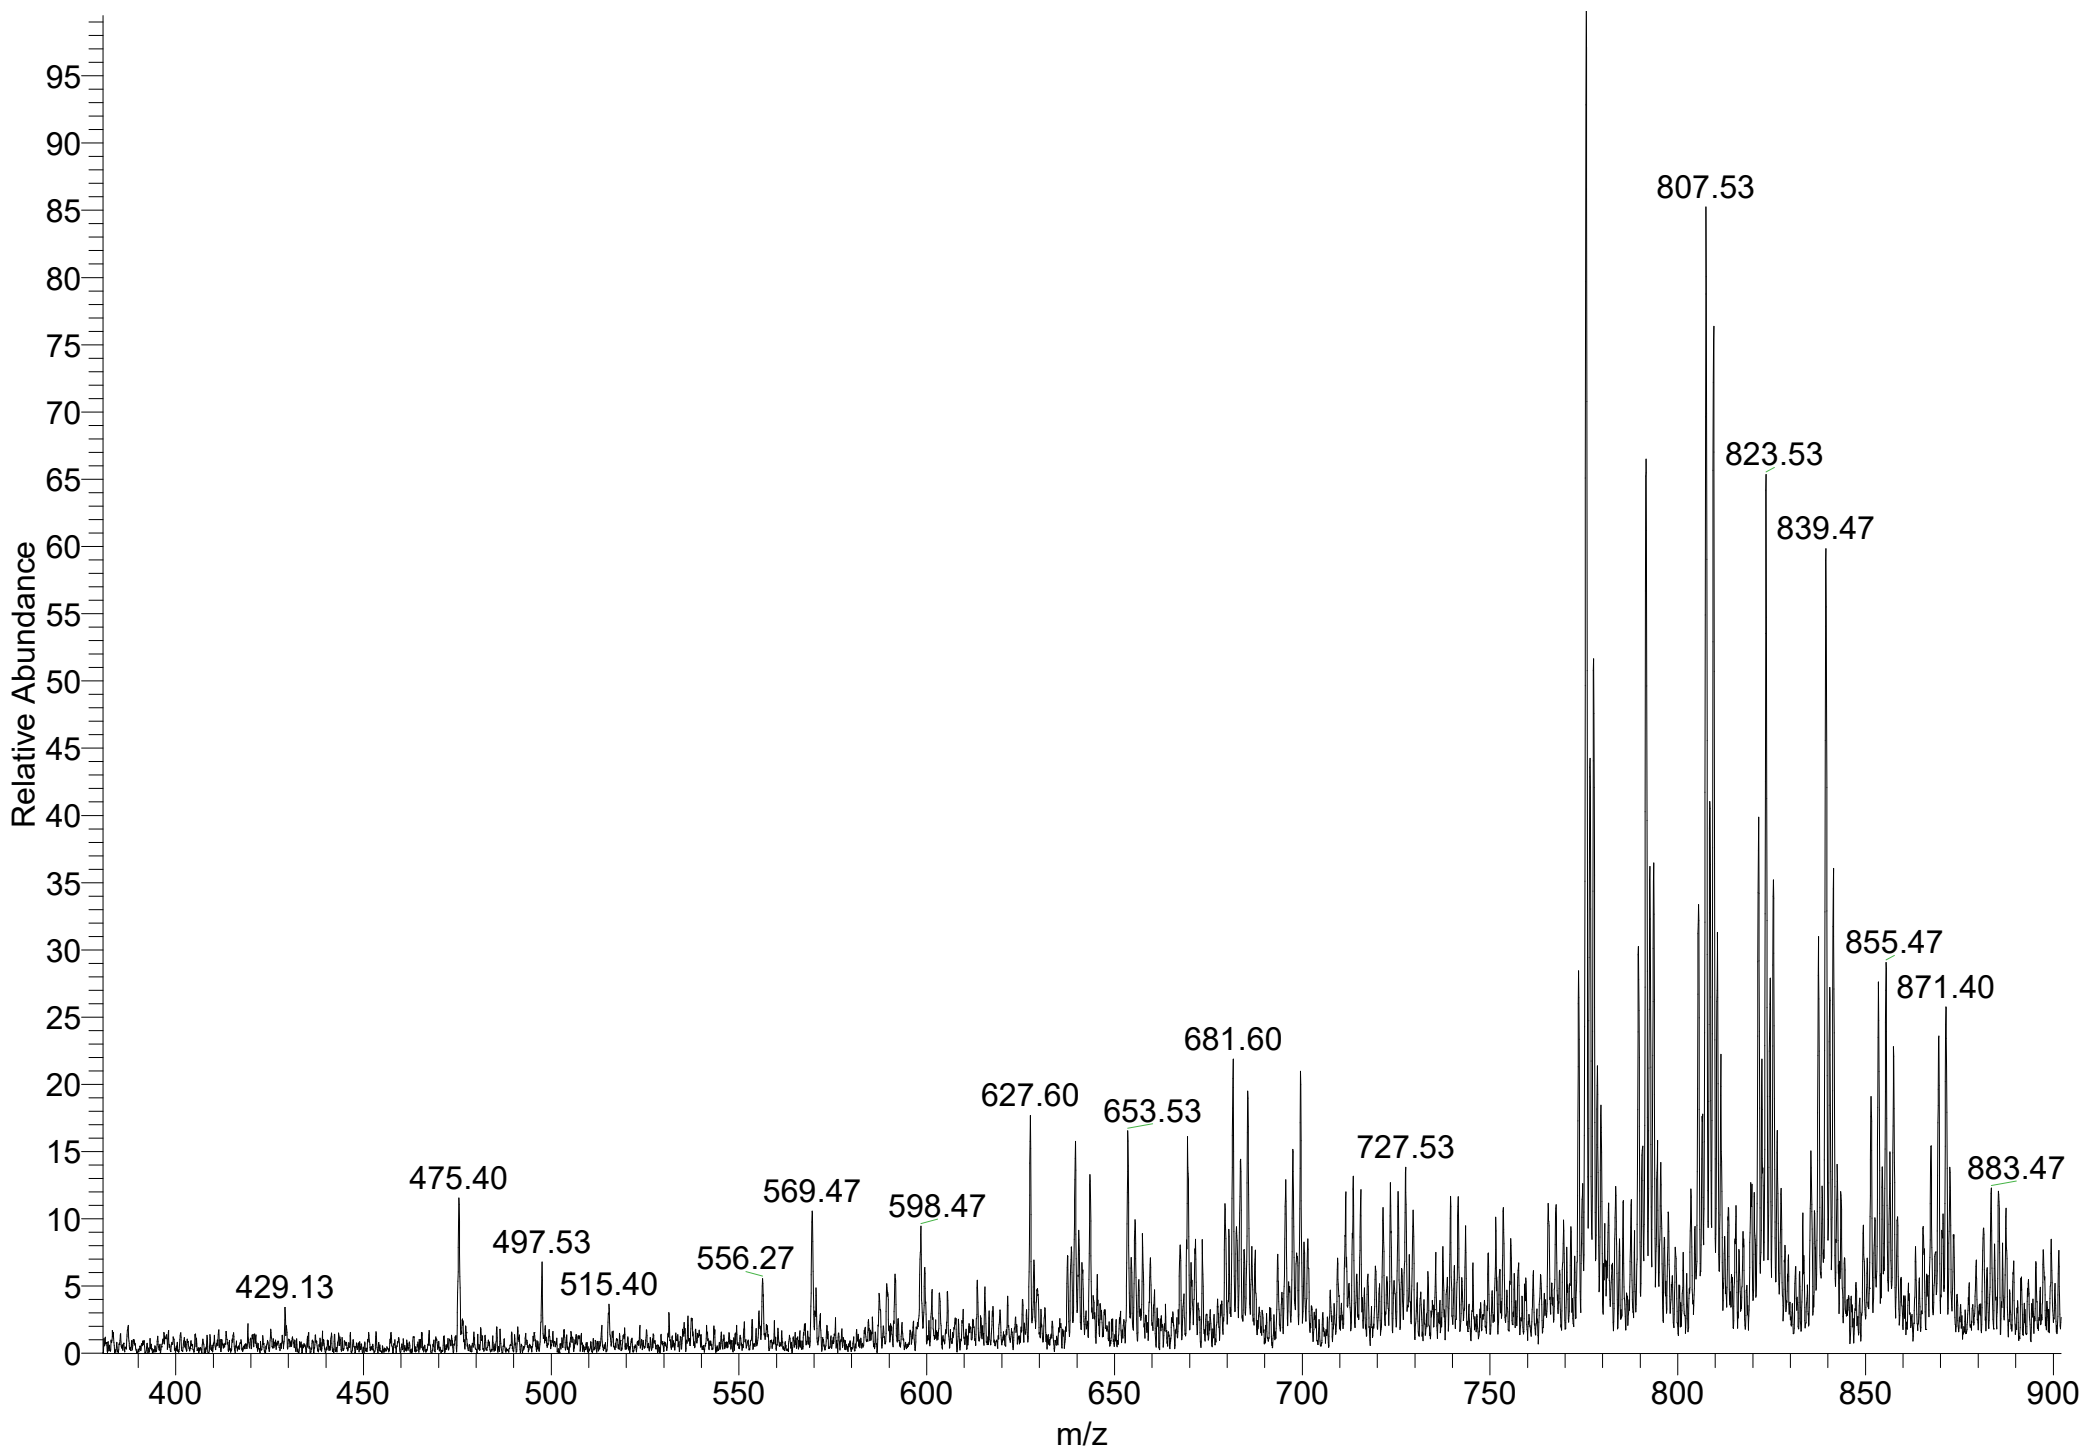

S5 #1-50 RT: 0.01-0.75 AV: 50 NL: 9.50E5

T: + p ESI ms [150.00-1000.00]

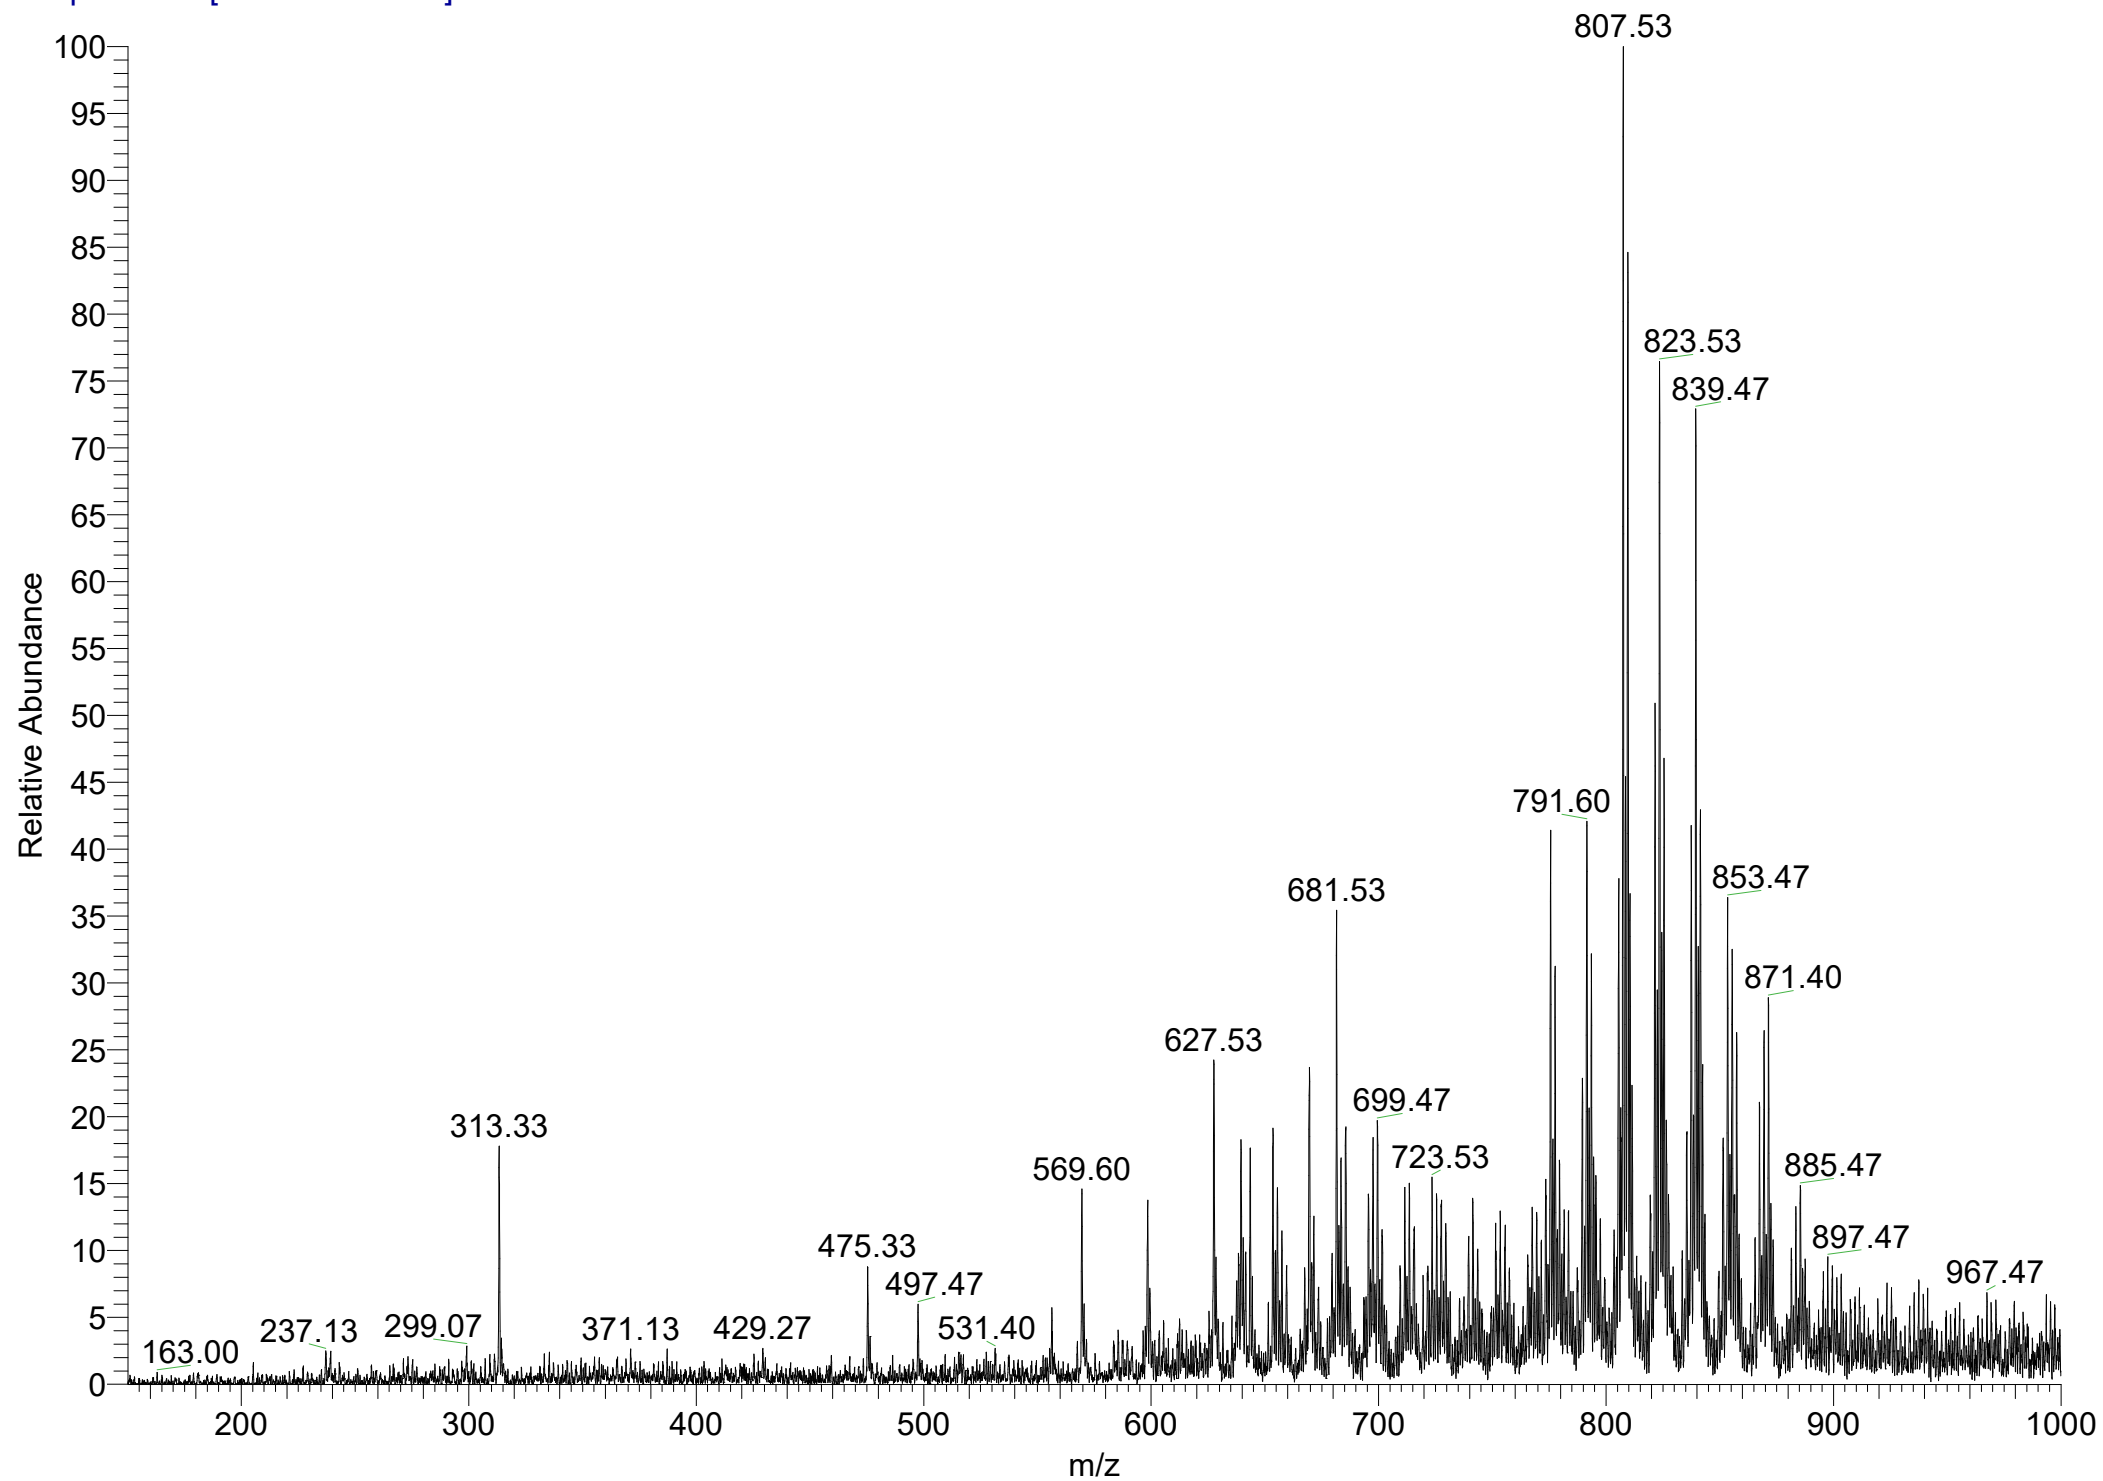

S5 #1-50 RT: 0.01-0.75 AV: 50 NL: 9.50E5

T: + p ESI ms [150.00-1000.00]

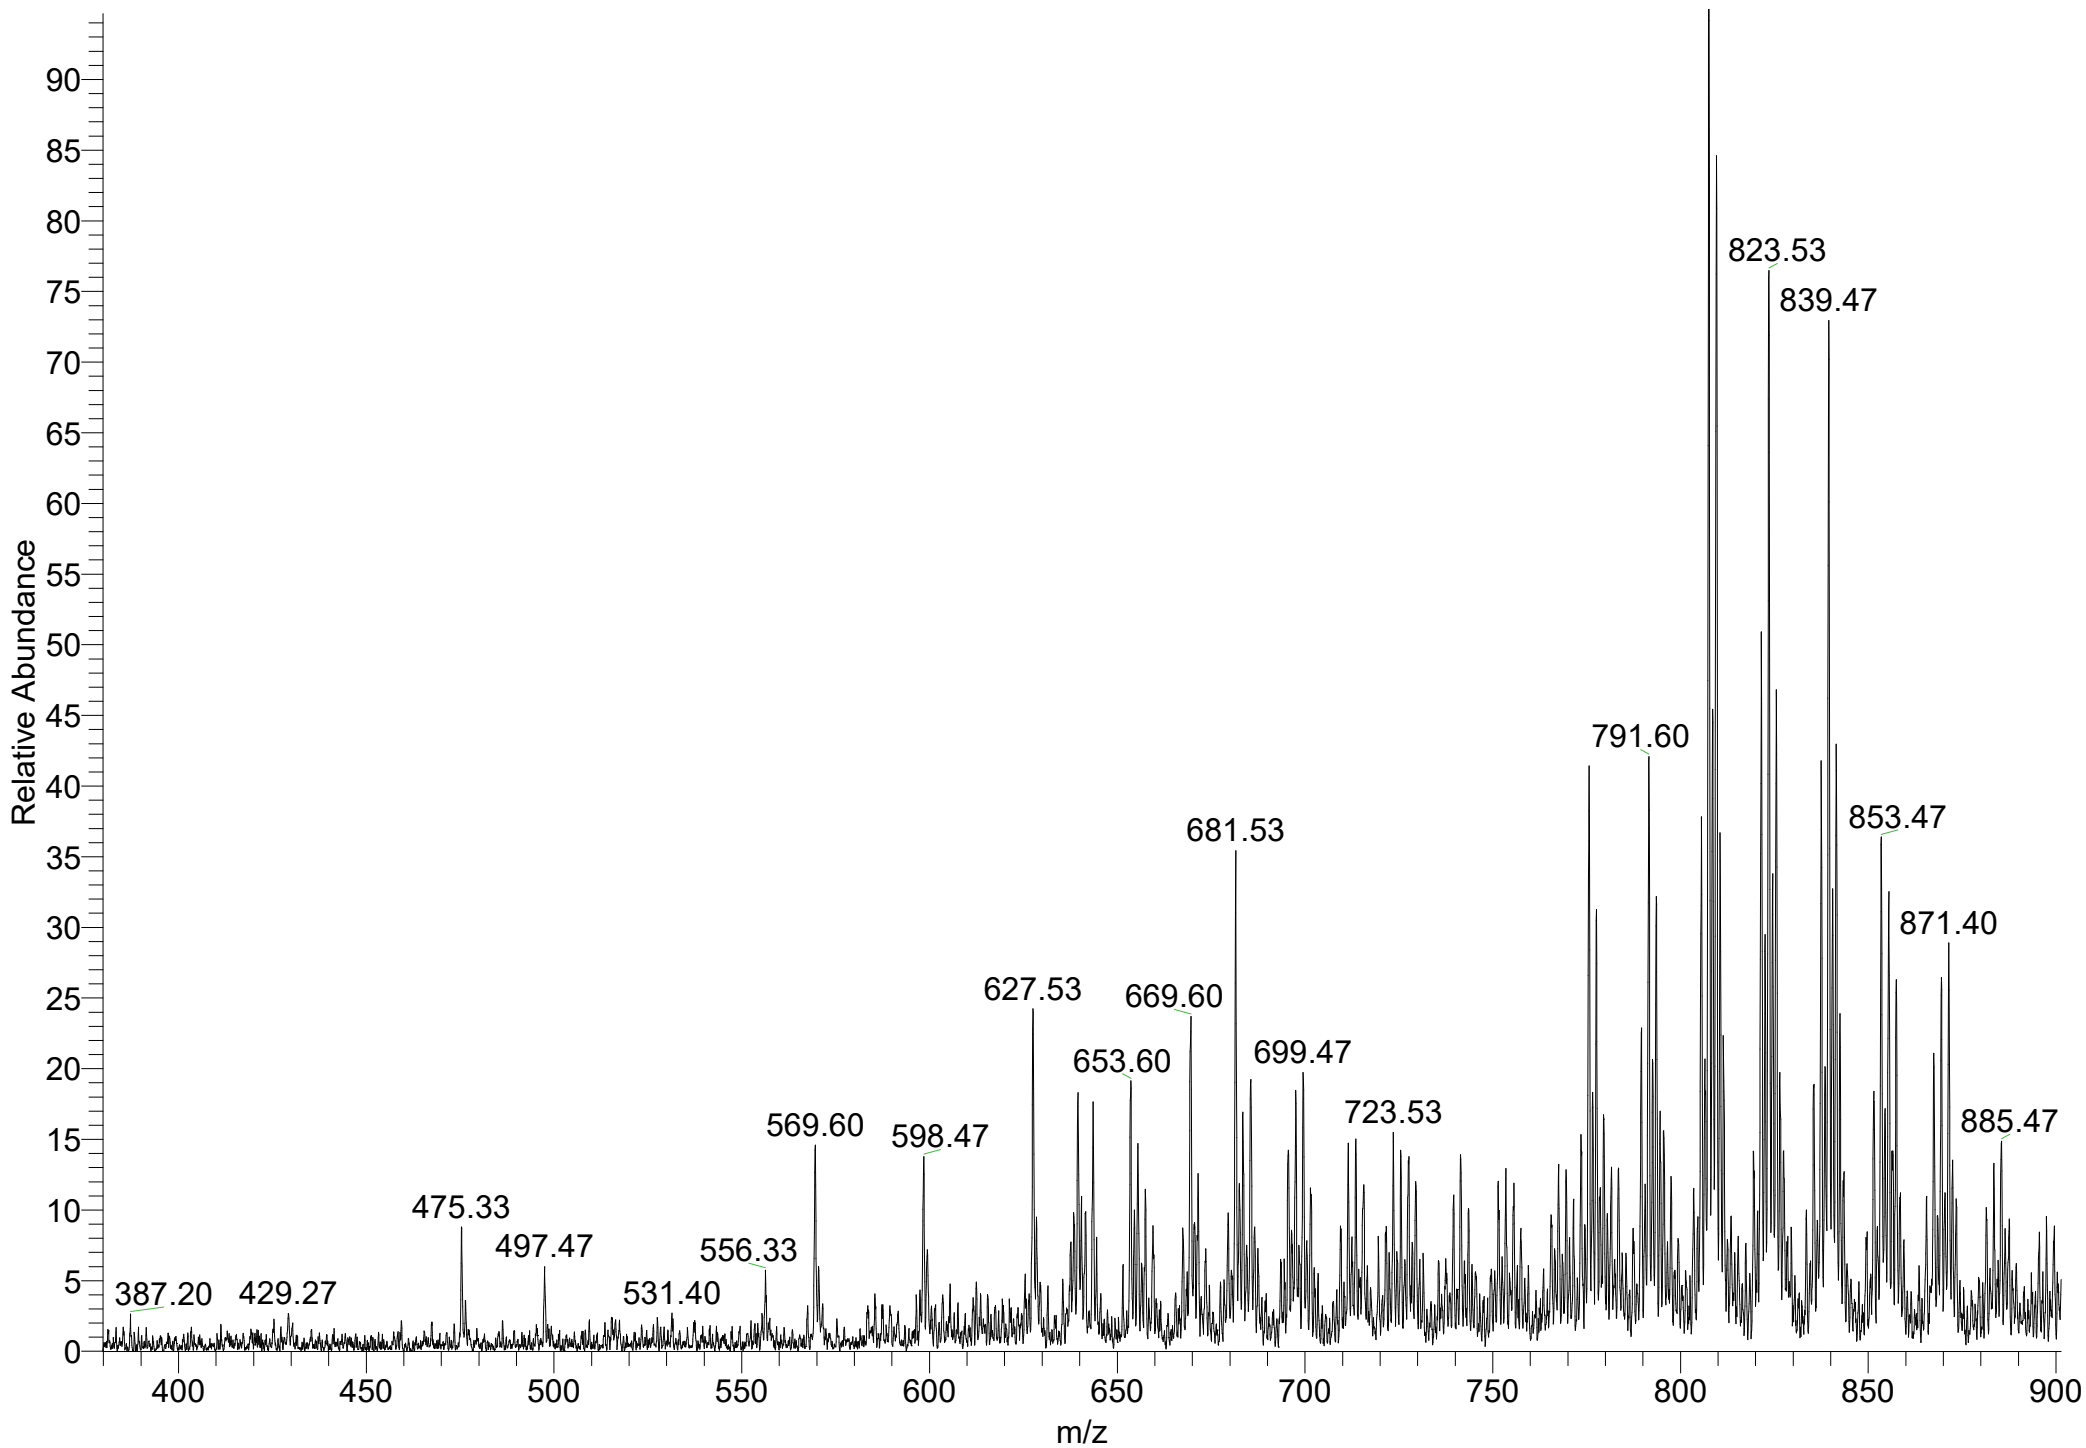

S6 #1-50 RT: 0.01-0.75 AV: 50 NL: 8.62E5

T: + p ESI ms [150.00-1000.00]

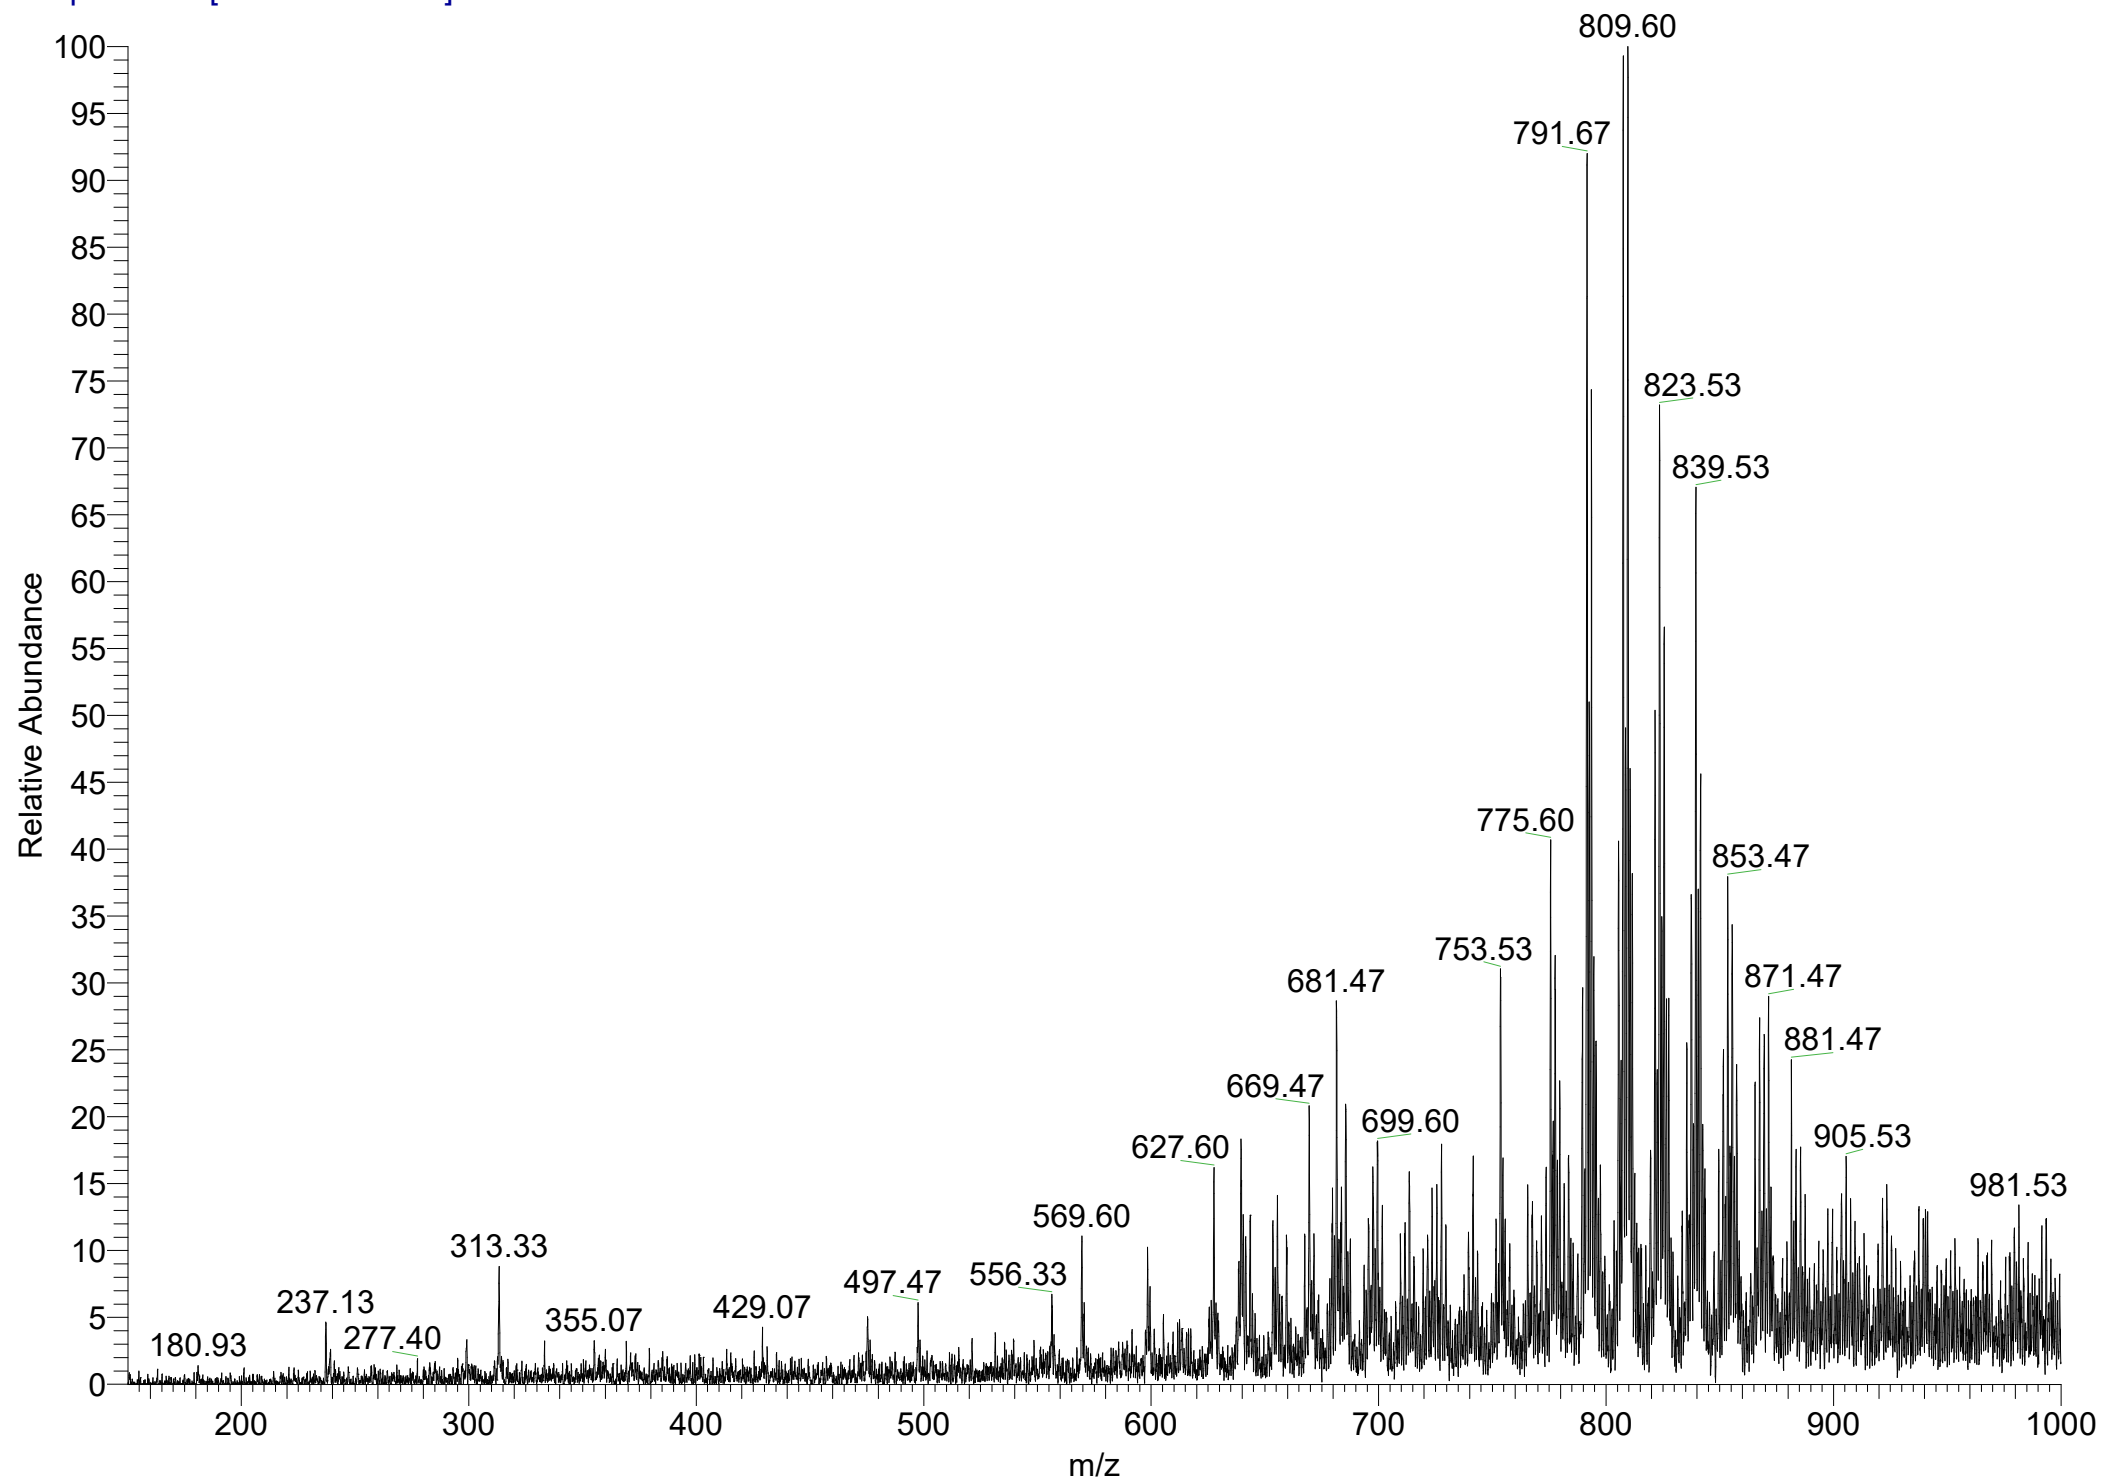

S6 #1-50 RT: 0.01-0.75 AV: 50 NL: 8.62E5

T: + p ESI ms [150.00-1000.00]

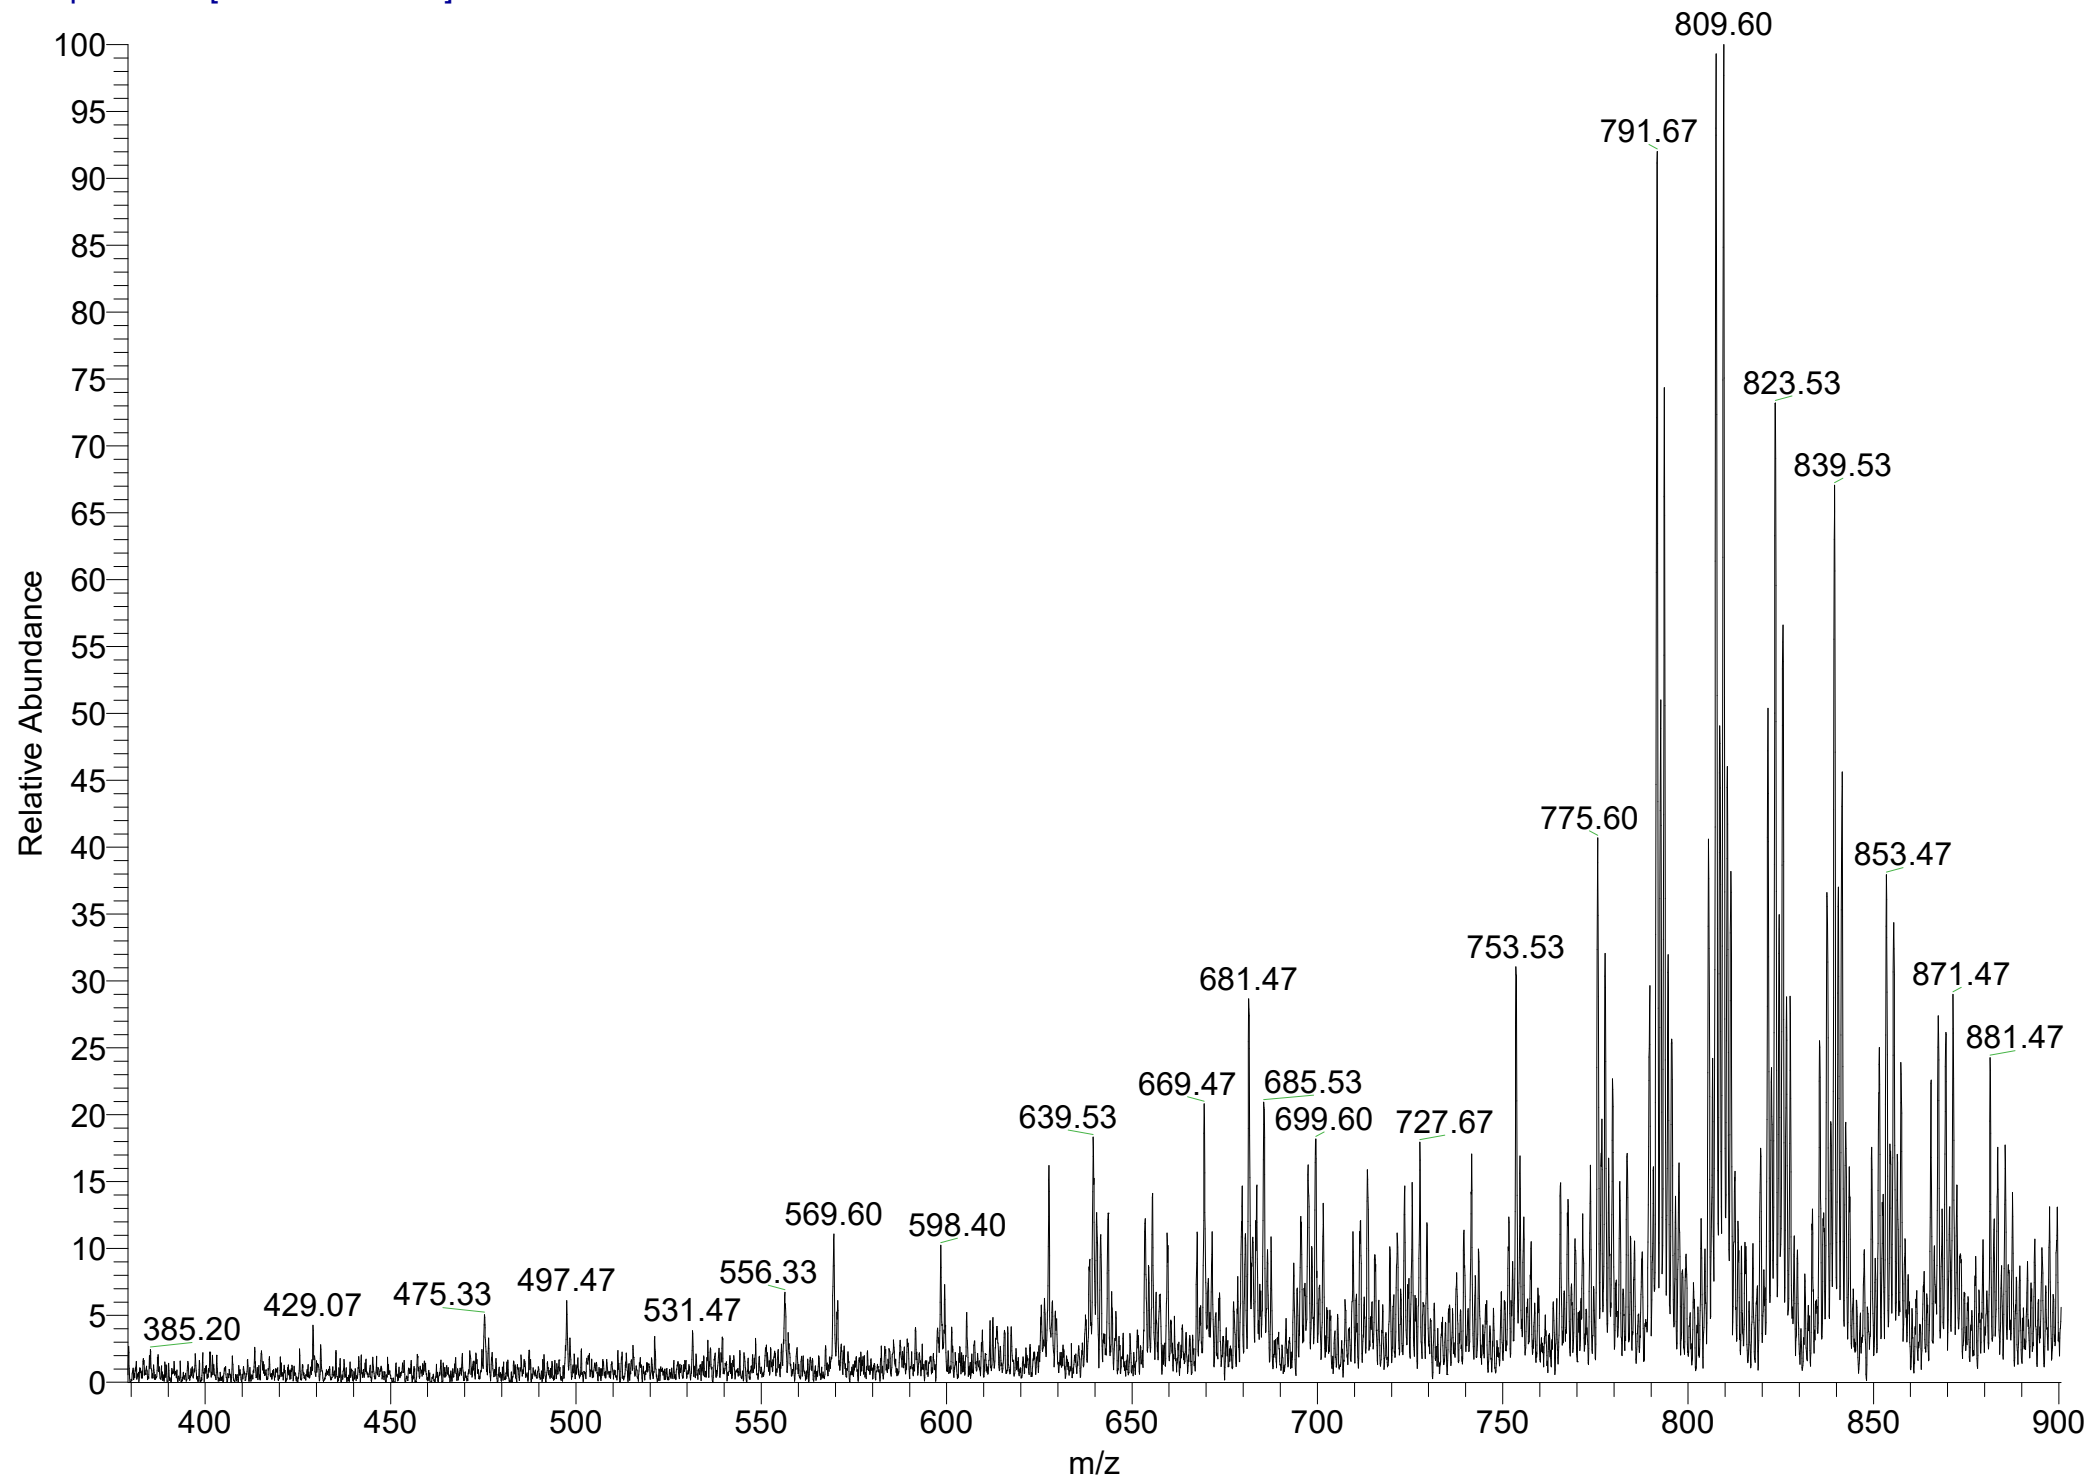

S7 #1-50 RT: 0.01-0.74 AV: 50 NL: 8.18E5

T: + p ESI ms [150.00-1000.00]

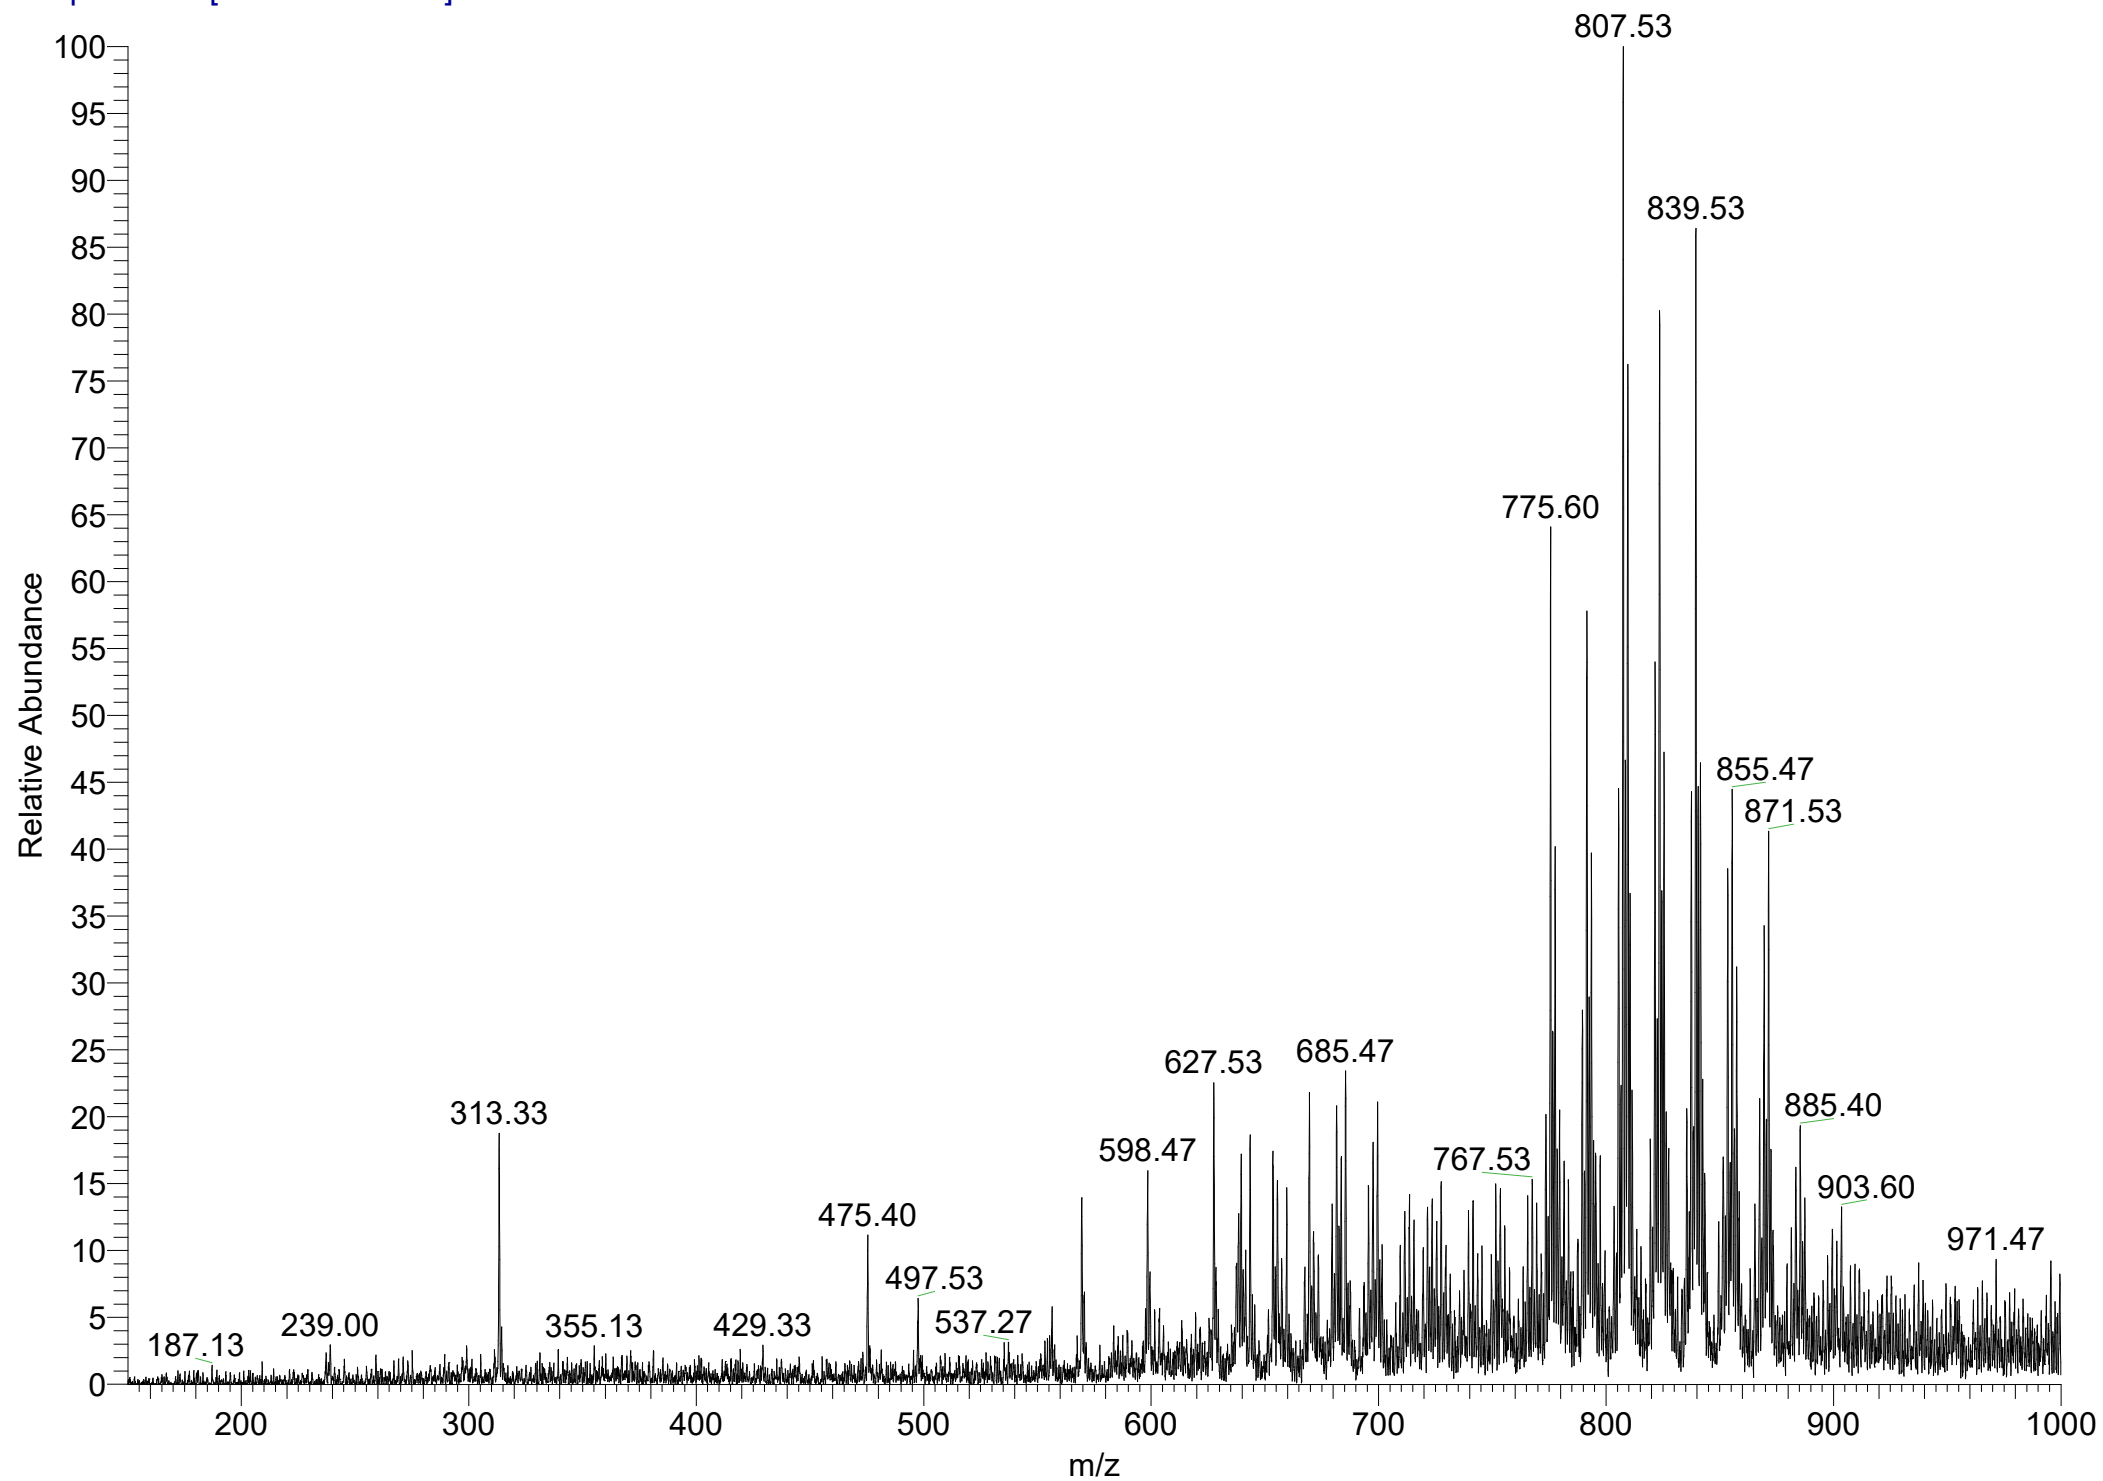



S7 #1-50 RT: 0.01-0.74 AV: 50 NL: 8.18E5

T: + p ESI ms [150.00-1000.00]

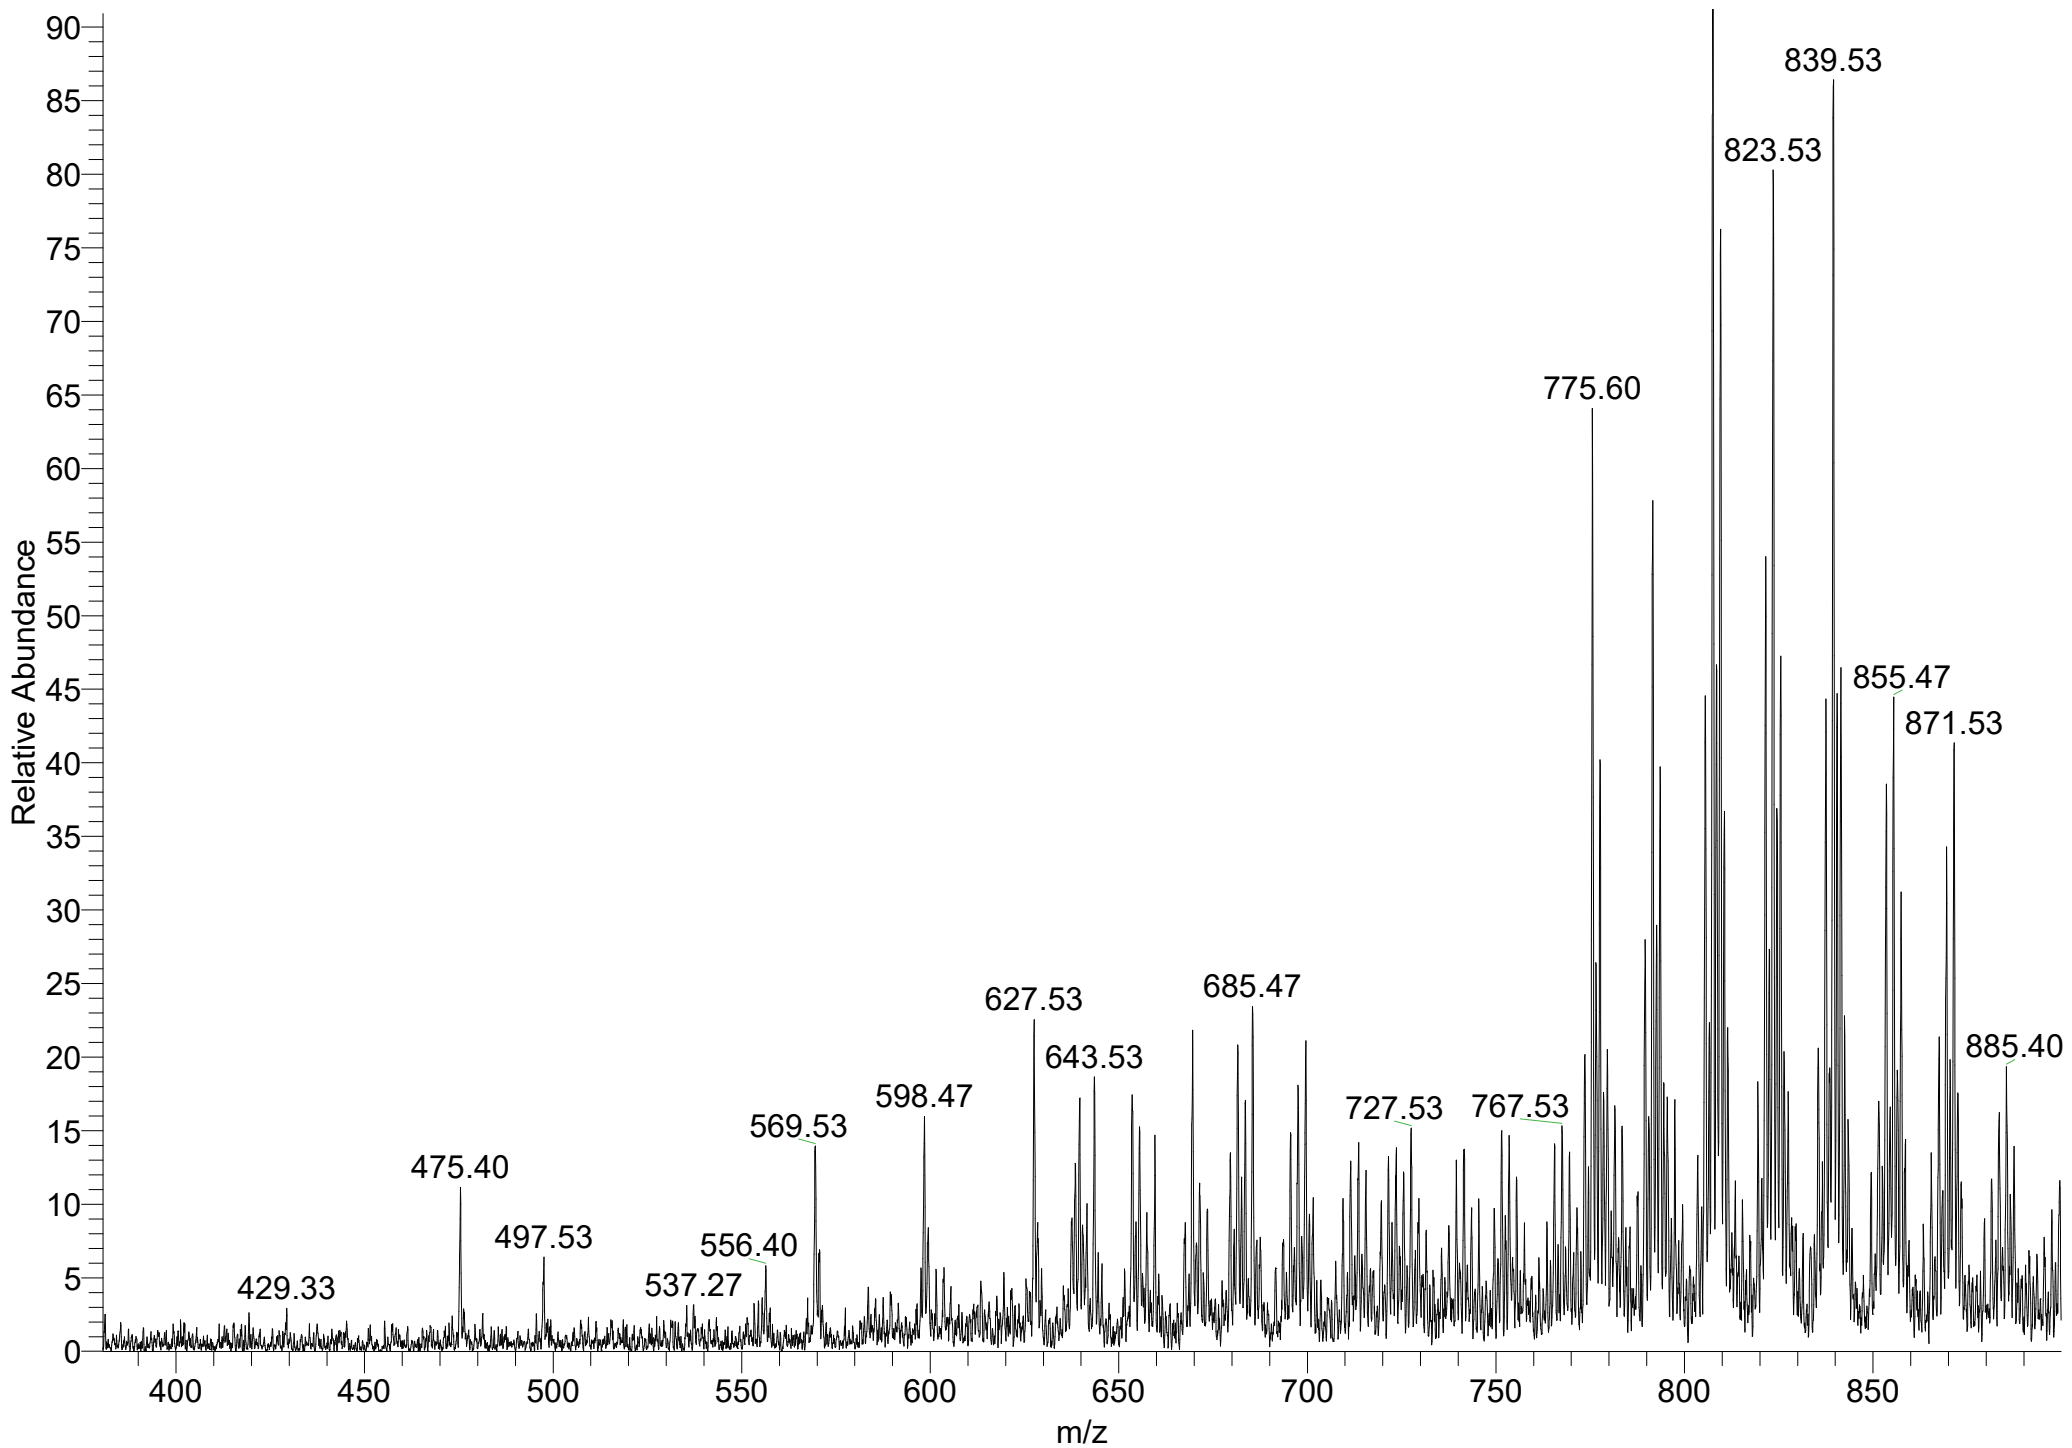

S8 #1-50 RT: 0.01-0.74 AV: 50 NL: 7.94E5

T: + p ESI ms [150.00-1000.00]

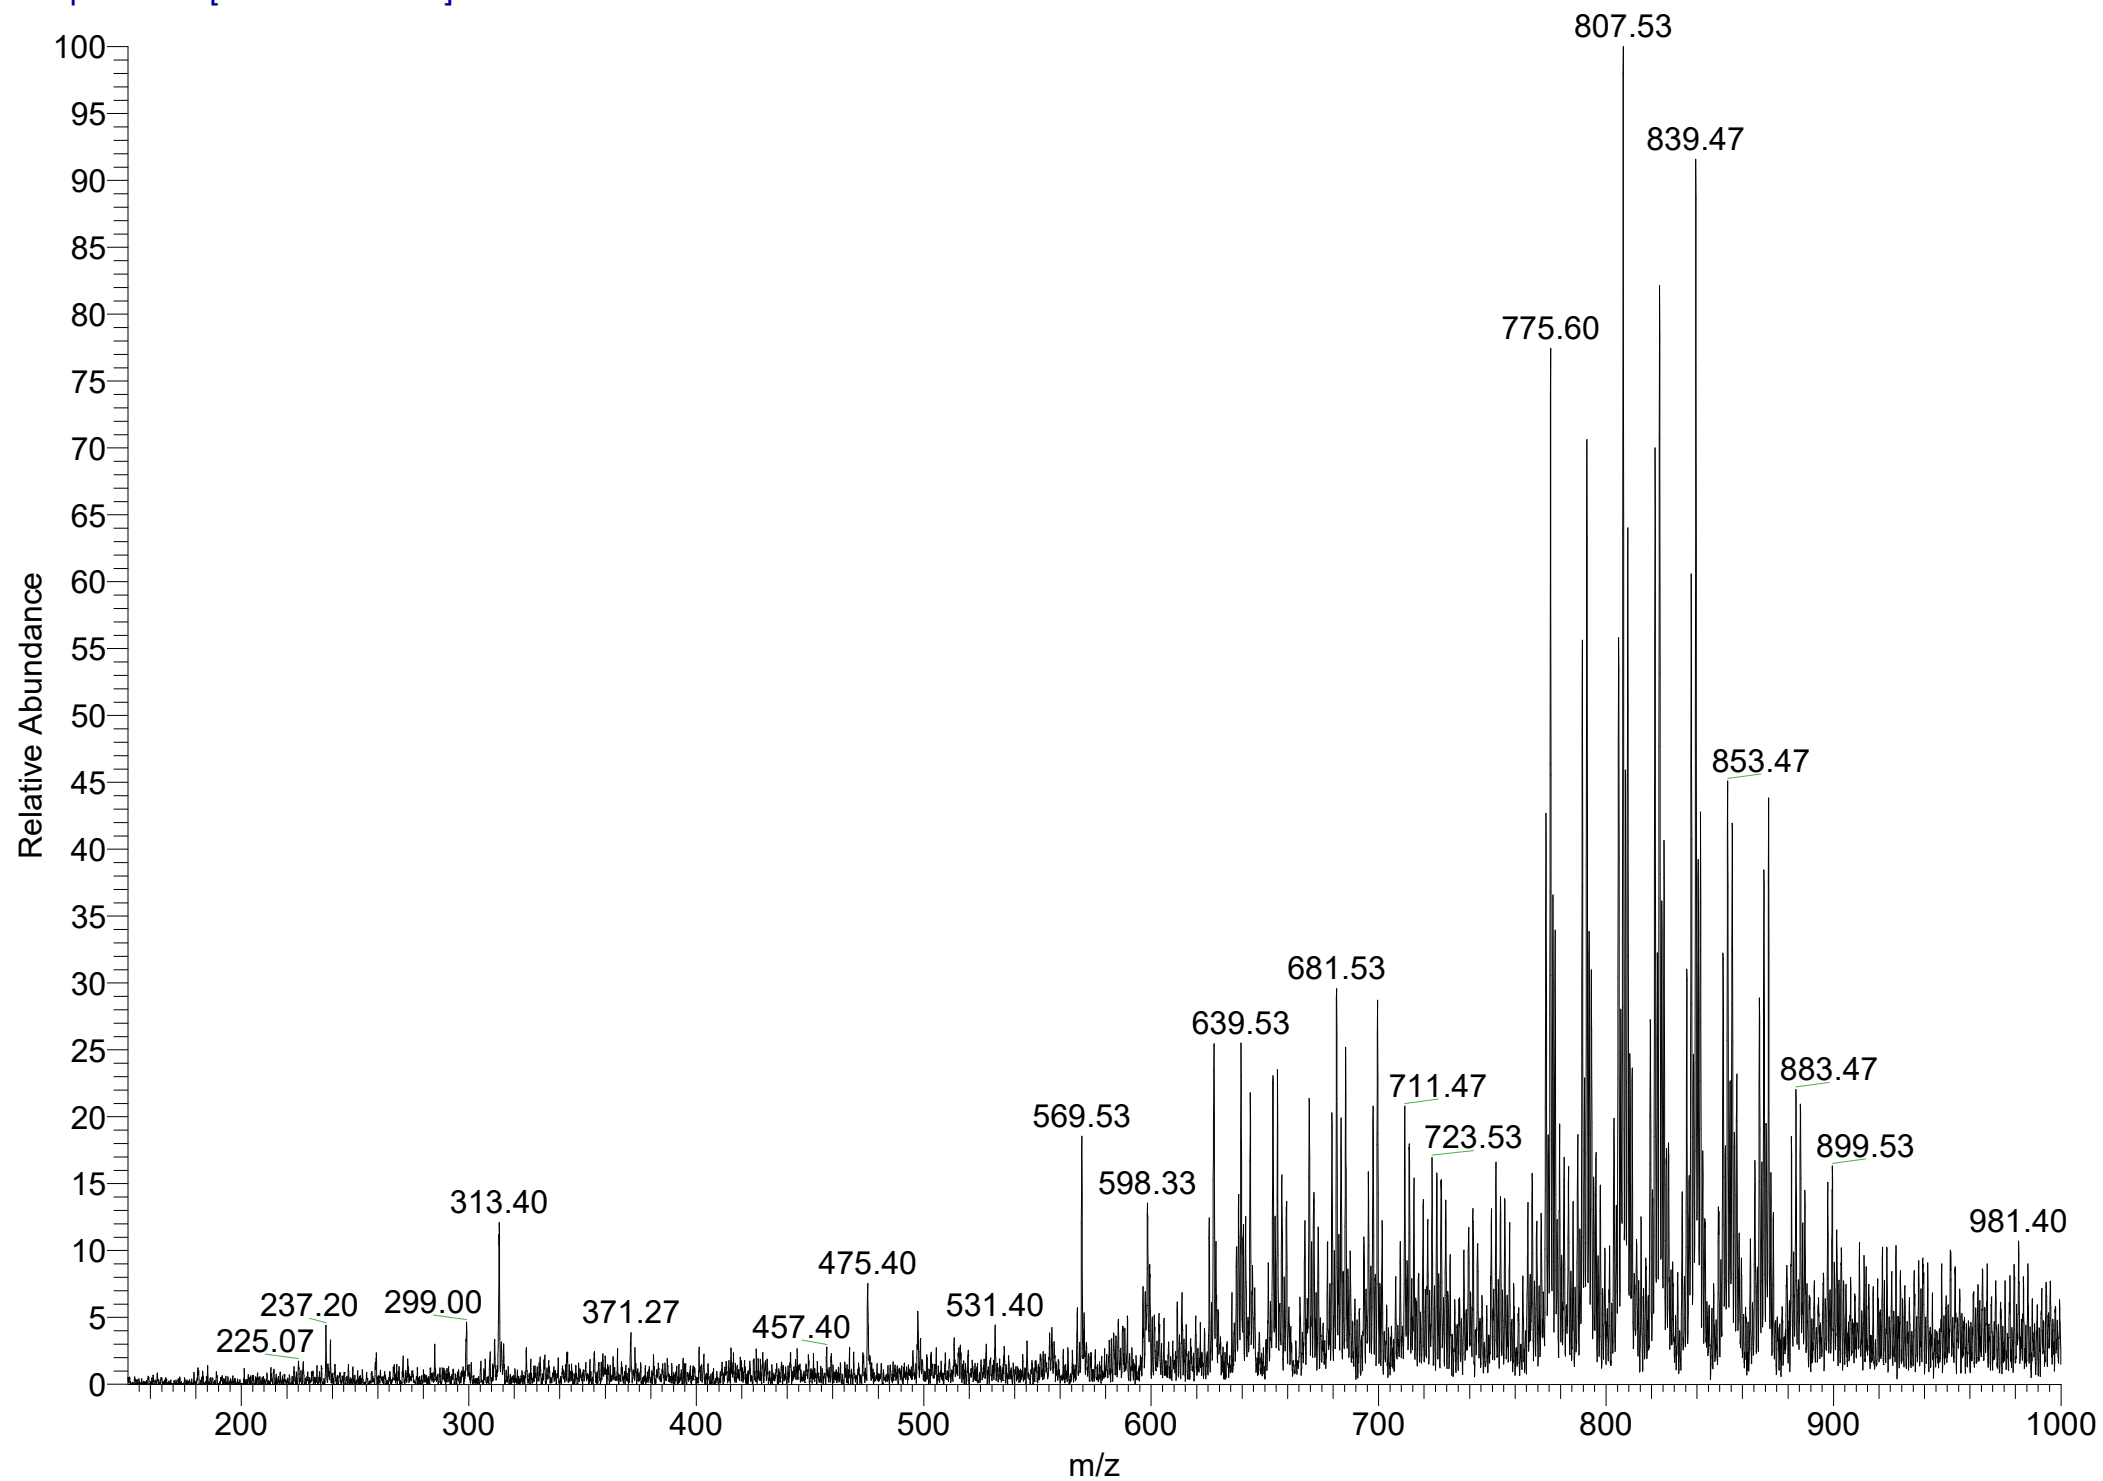

S8 #1-50 RT: 0.01-0.74 AV: 50 NL: 7.94E5

T: + p ESI ms [150.00-1000.00]

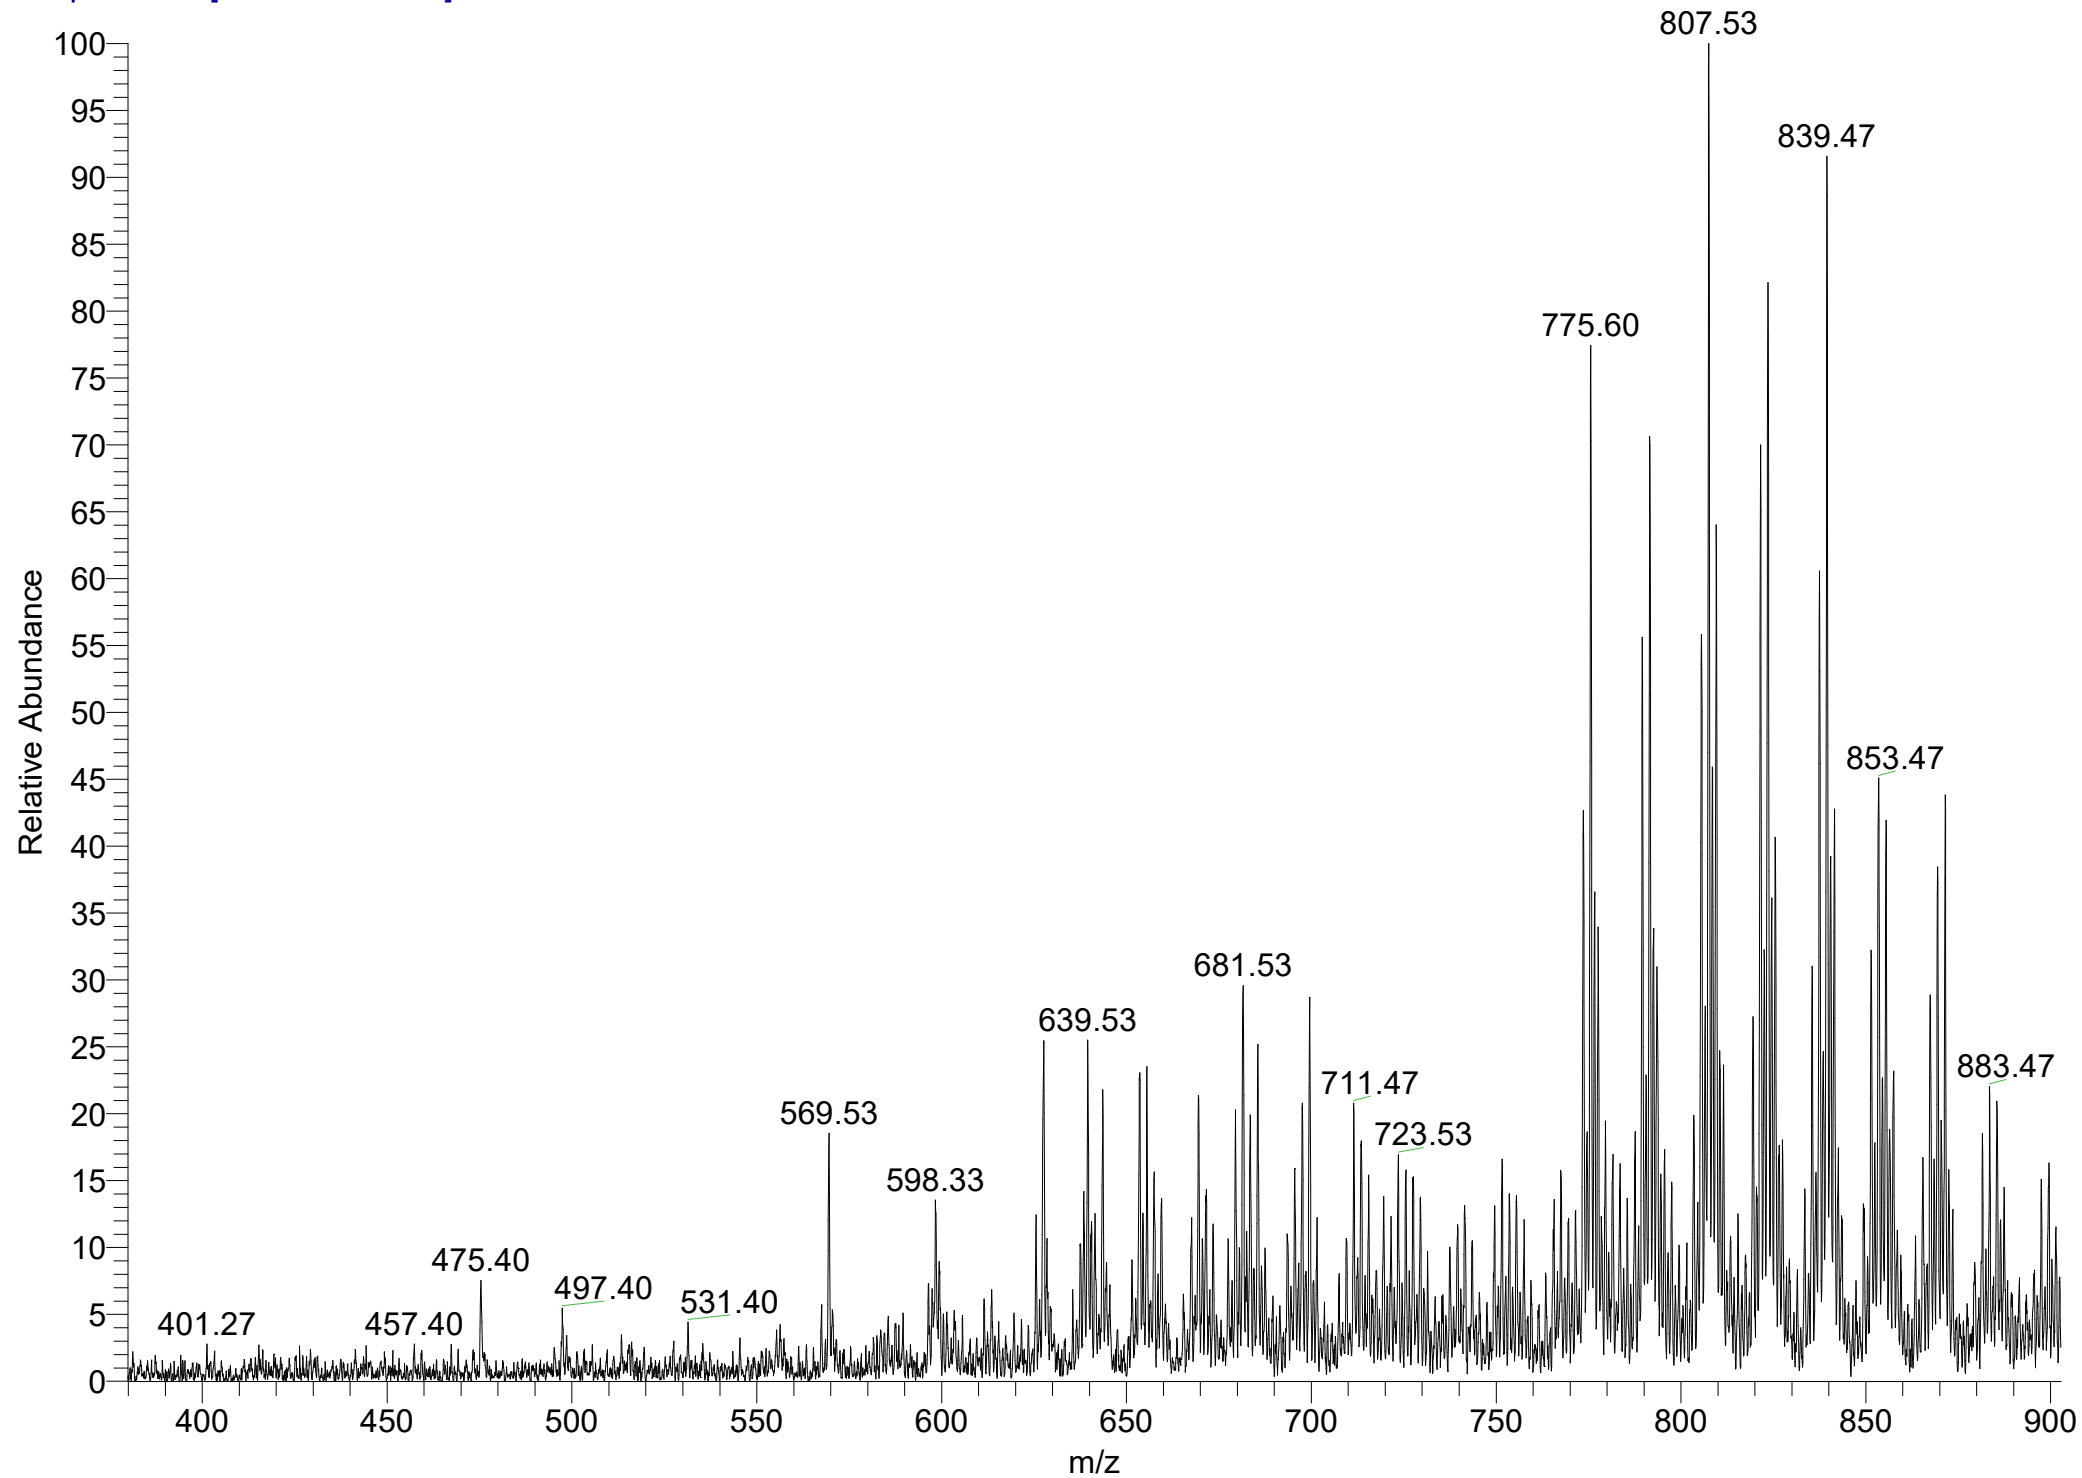

S9 #1-50 RT: 0.01-0.75 AV: 50 NL: 7.68E5

T: + p ESI ms [150.00-1000.00]

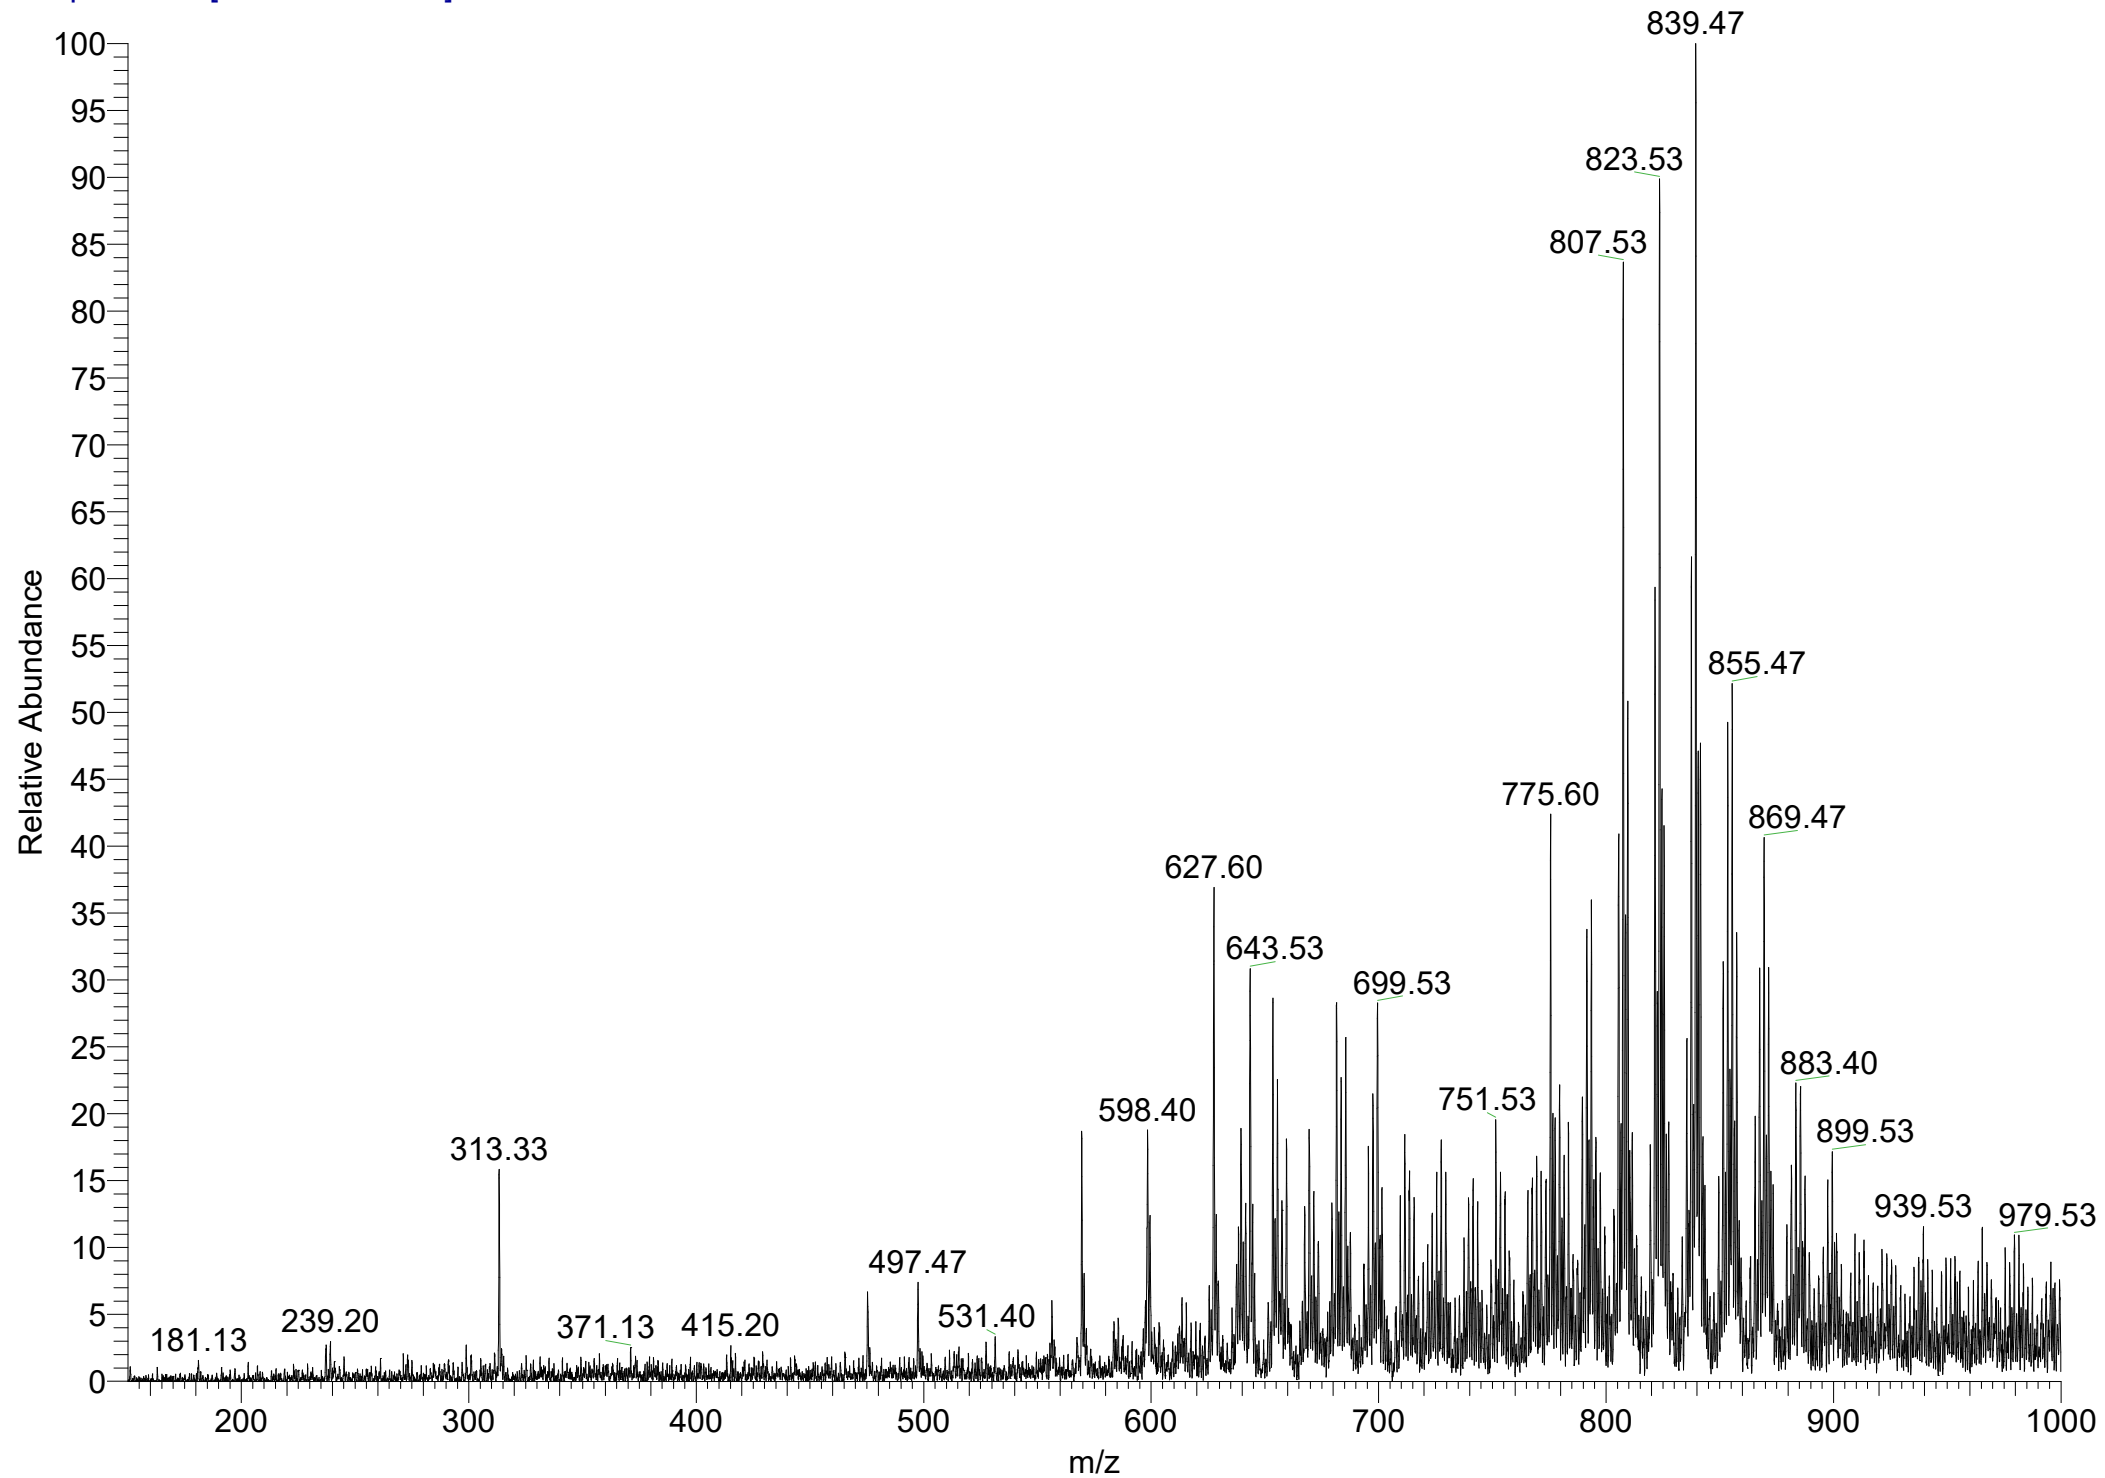

S9 #1-50 RT: 0.01-0.75 AV: 50 NL: 7.68E5

T: + p ESI ms [150.00-1000.00]

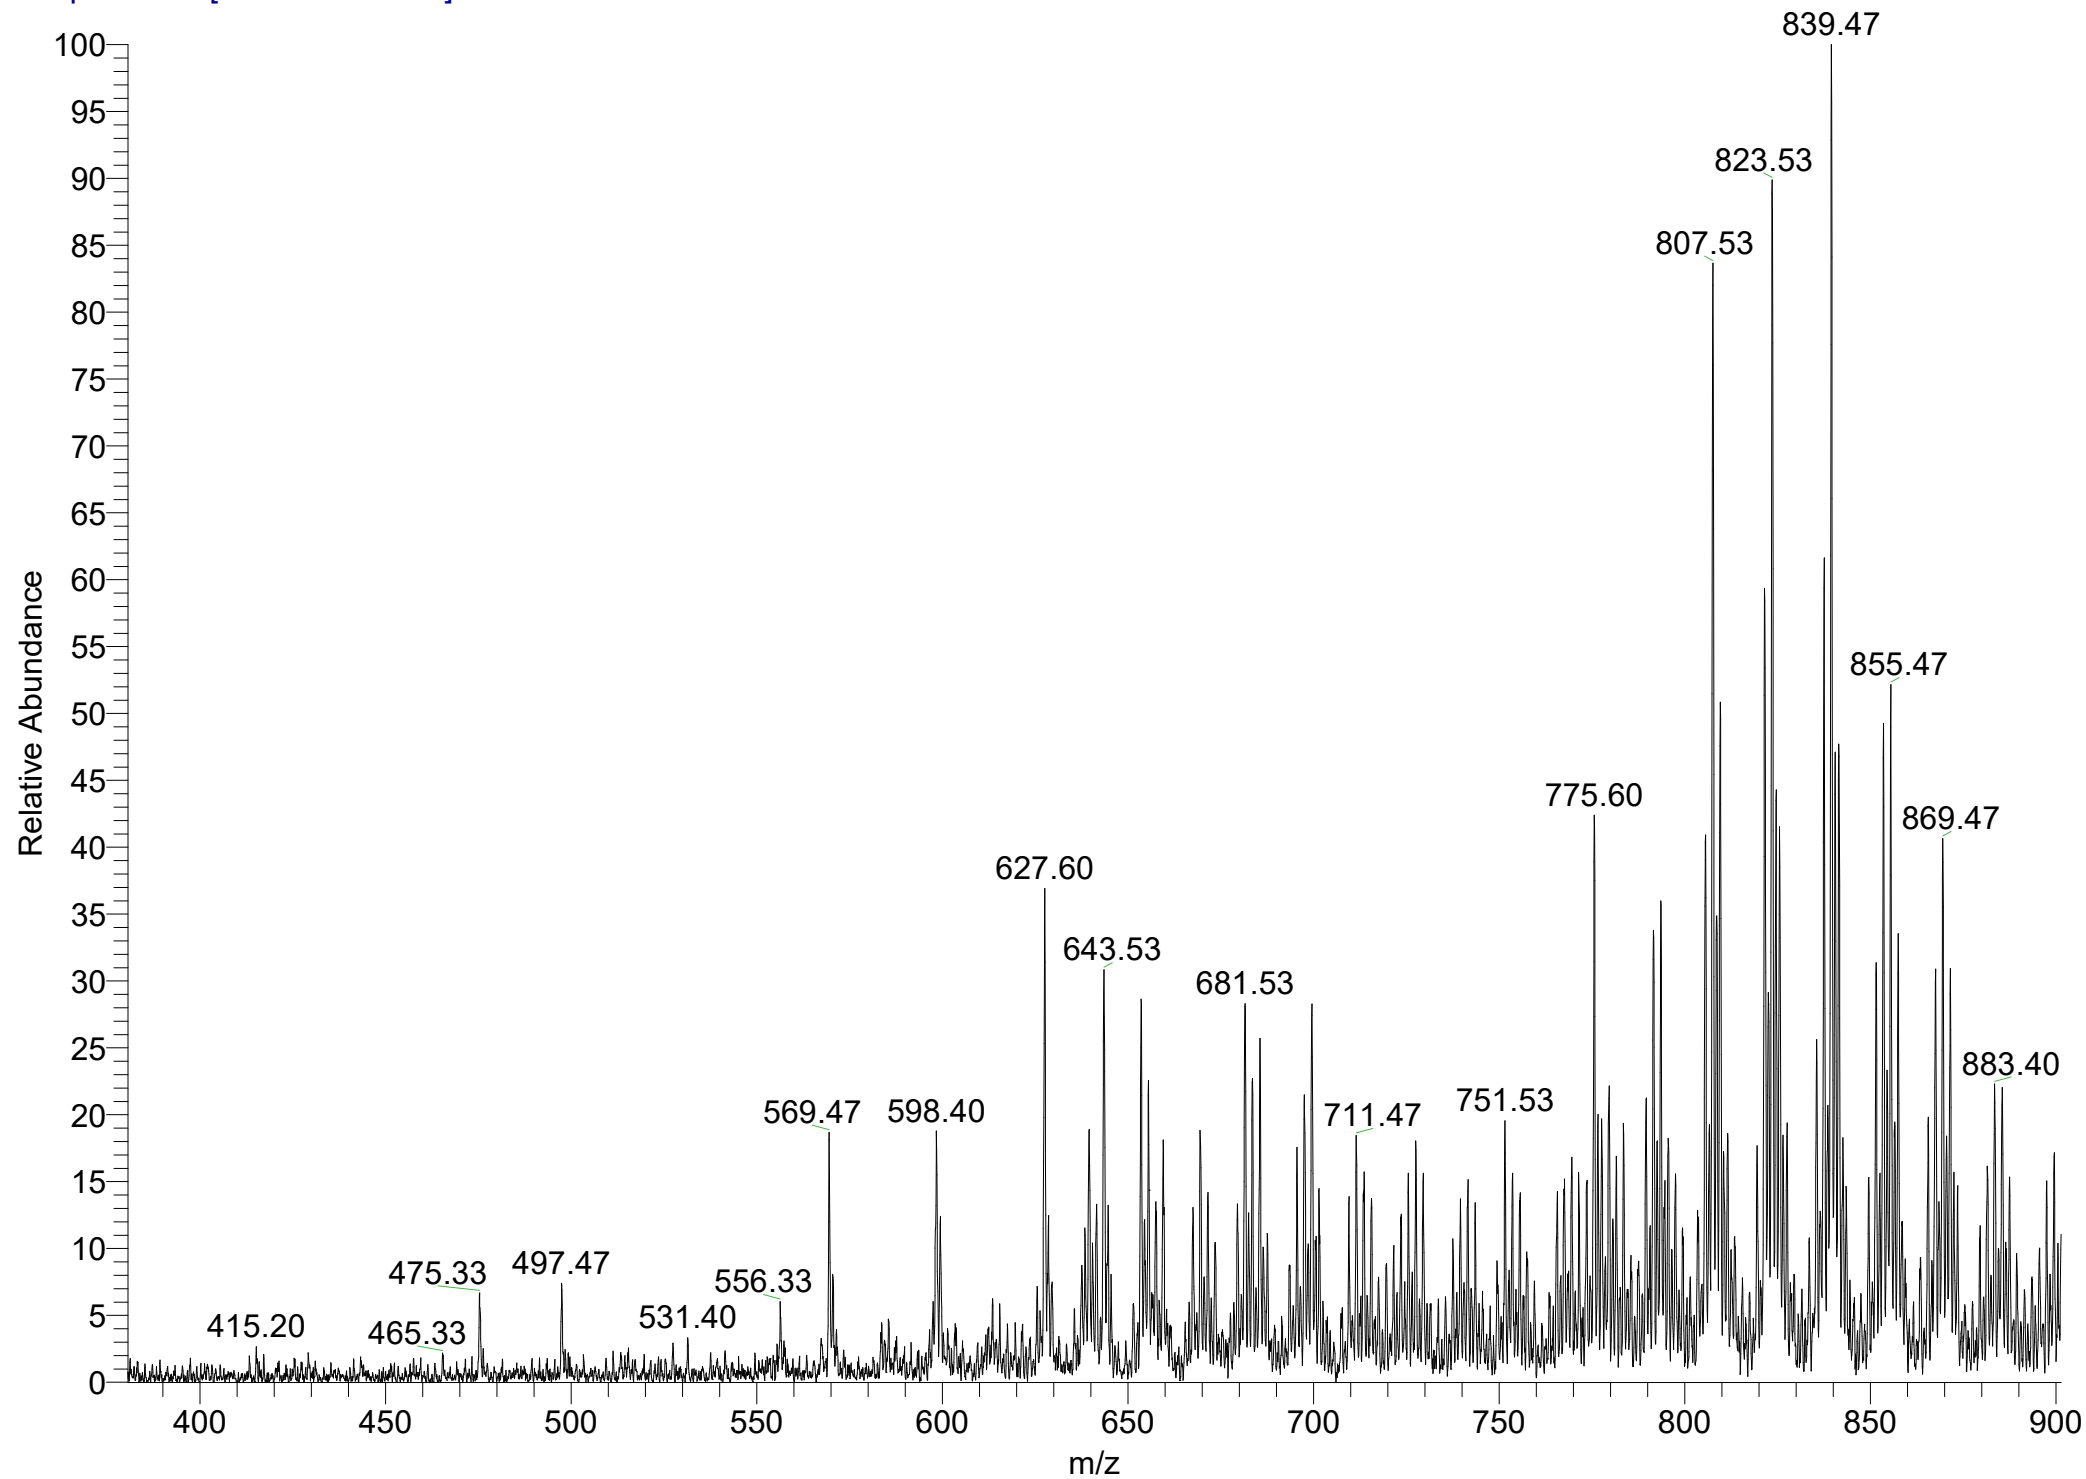

S10 #1-50 RT: 0.00-0.74 AV: 50 NL: 5.21E5

T: + p ESI ms [150.00-1000.00]

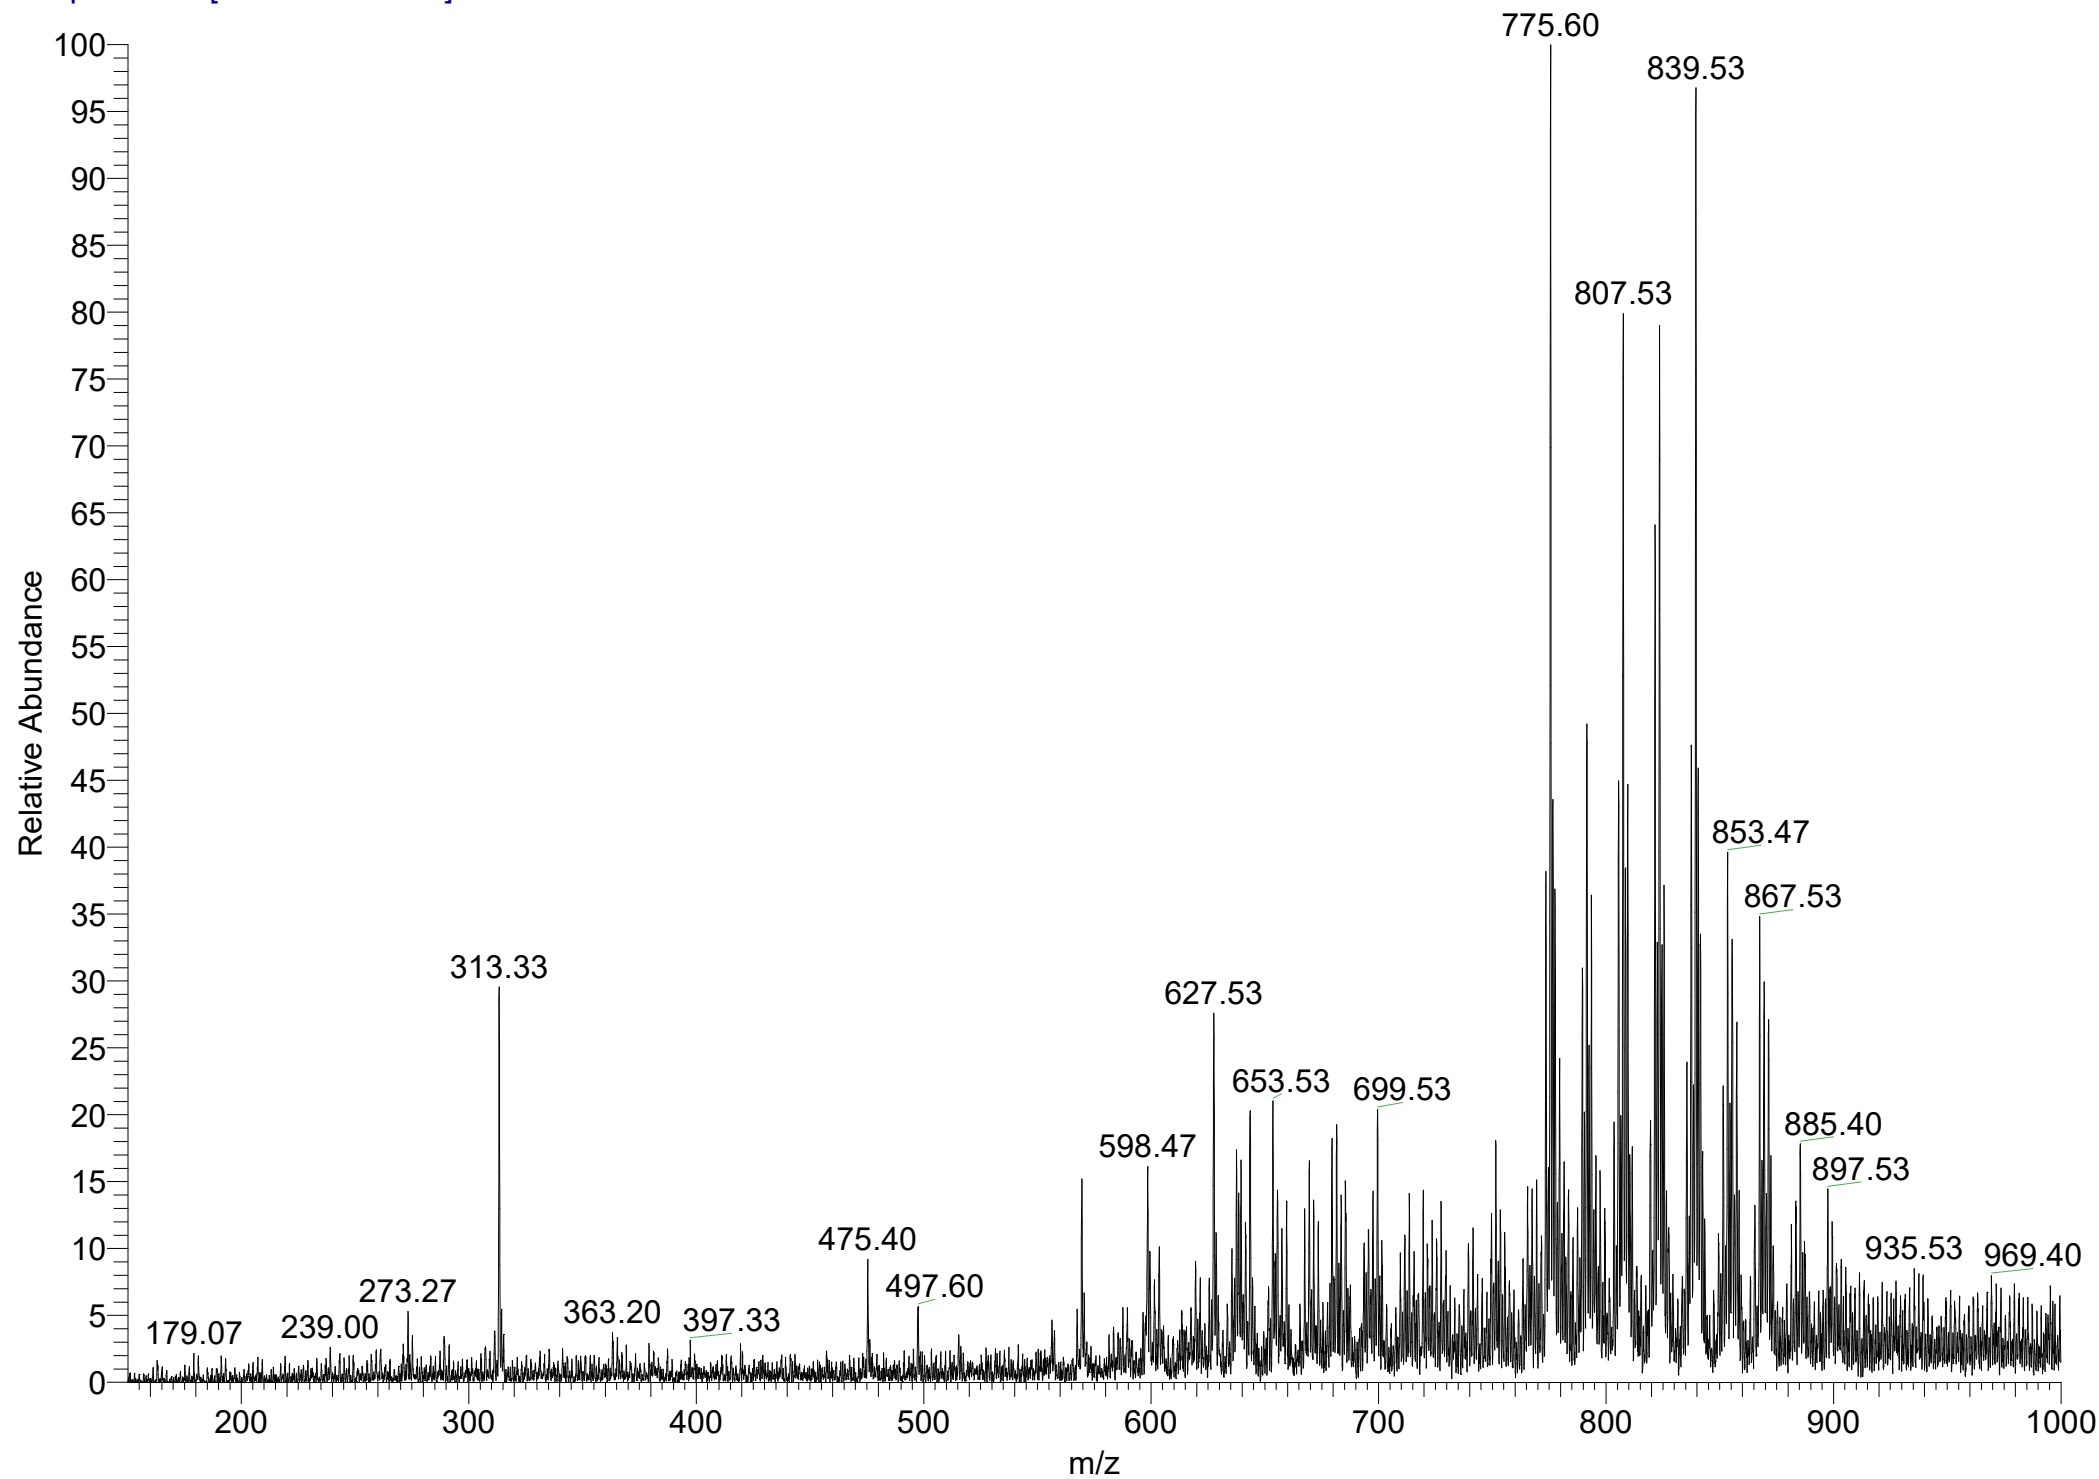

S10 #1-50 RT: 0.00-0.74 AV: 50 NL: 5.21E5

T: + p ESI ms [150.00-1000.00]

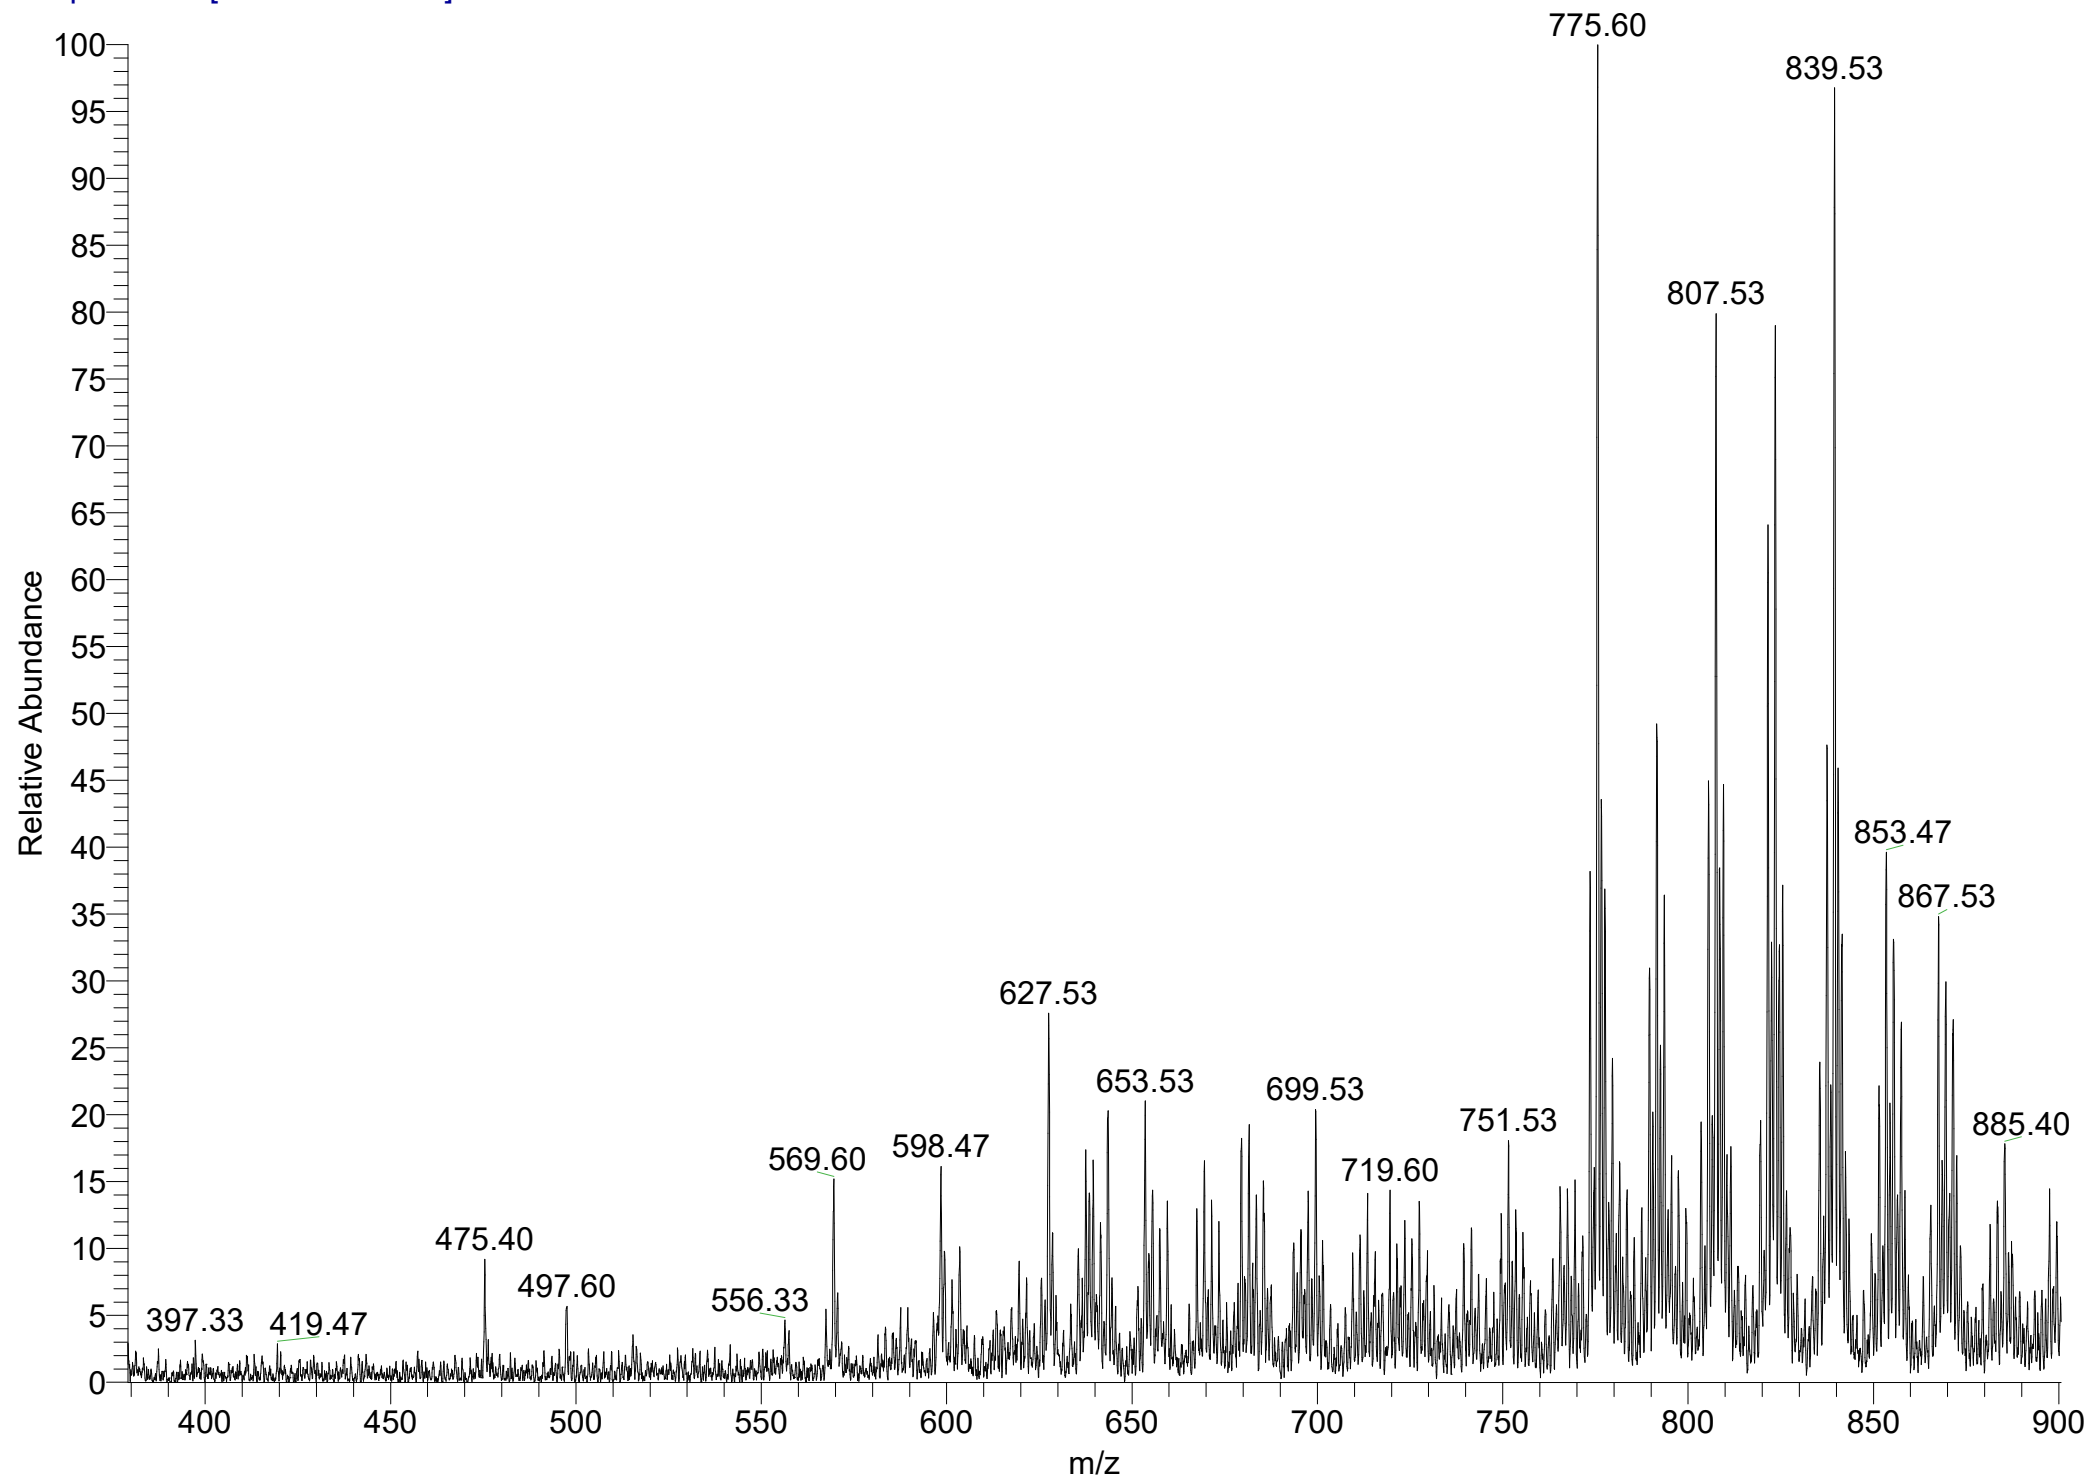

S11 #1-50 RT: 0.01-0.74 AV: 50 NL: 8.25E5

T: + p ESI ms [150.00-1000.00]

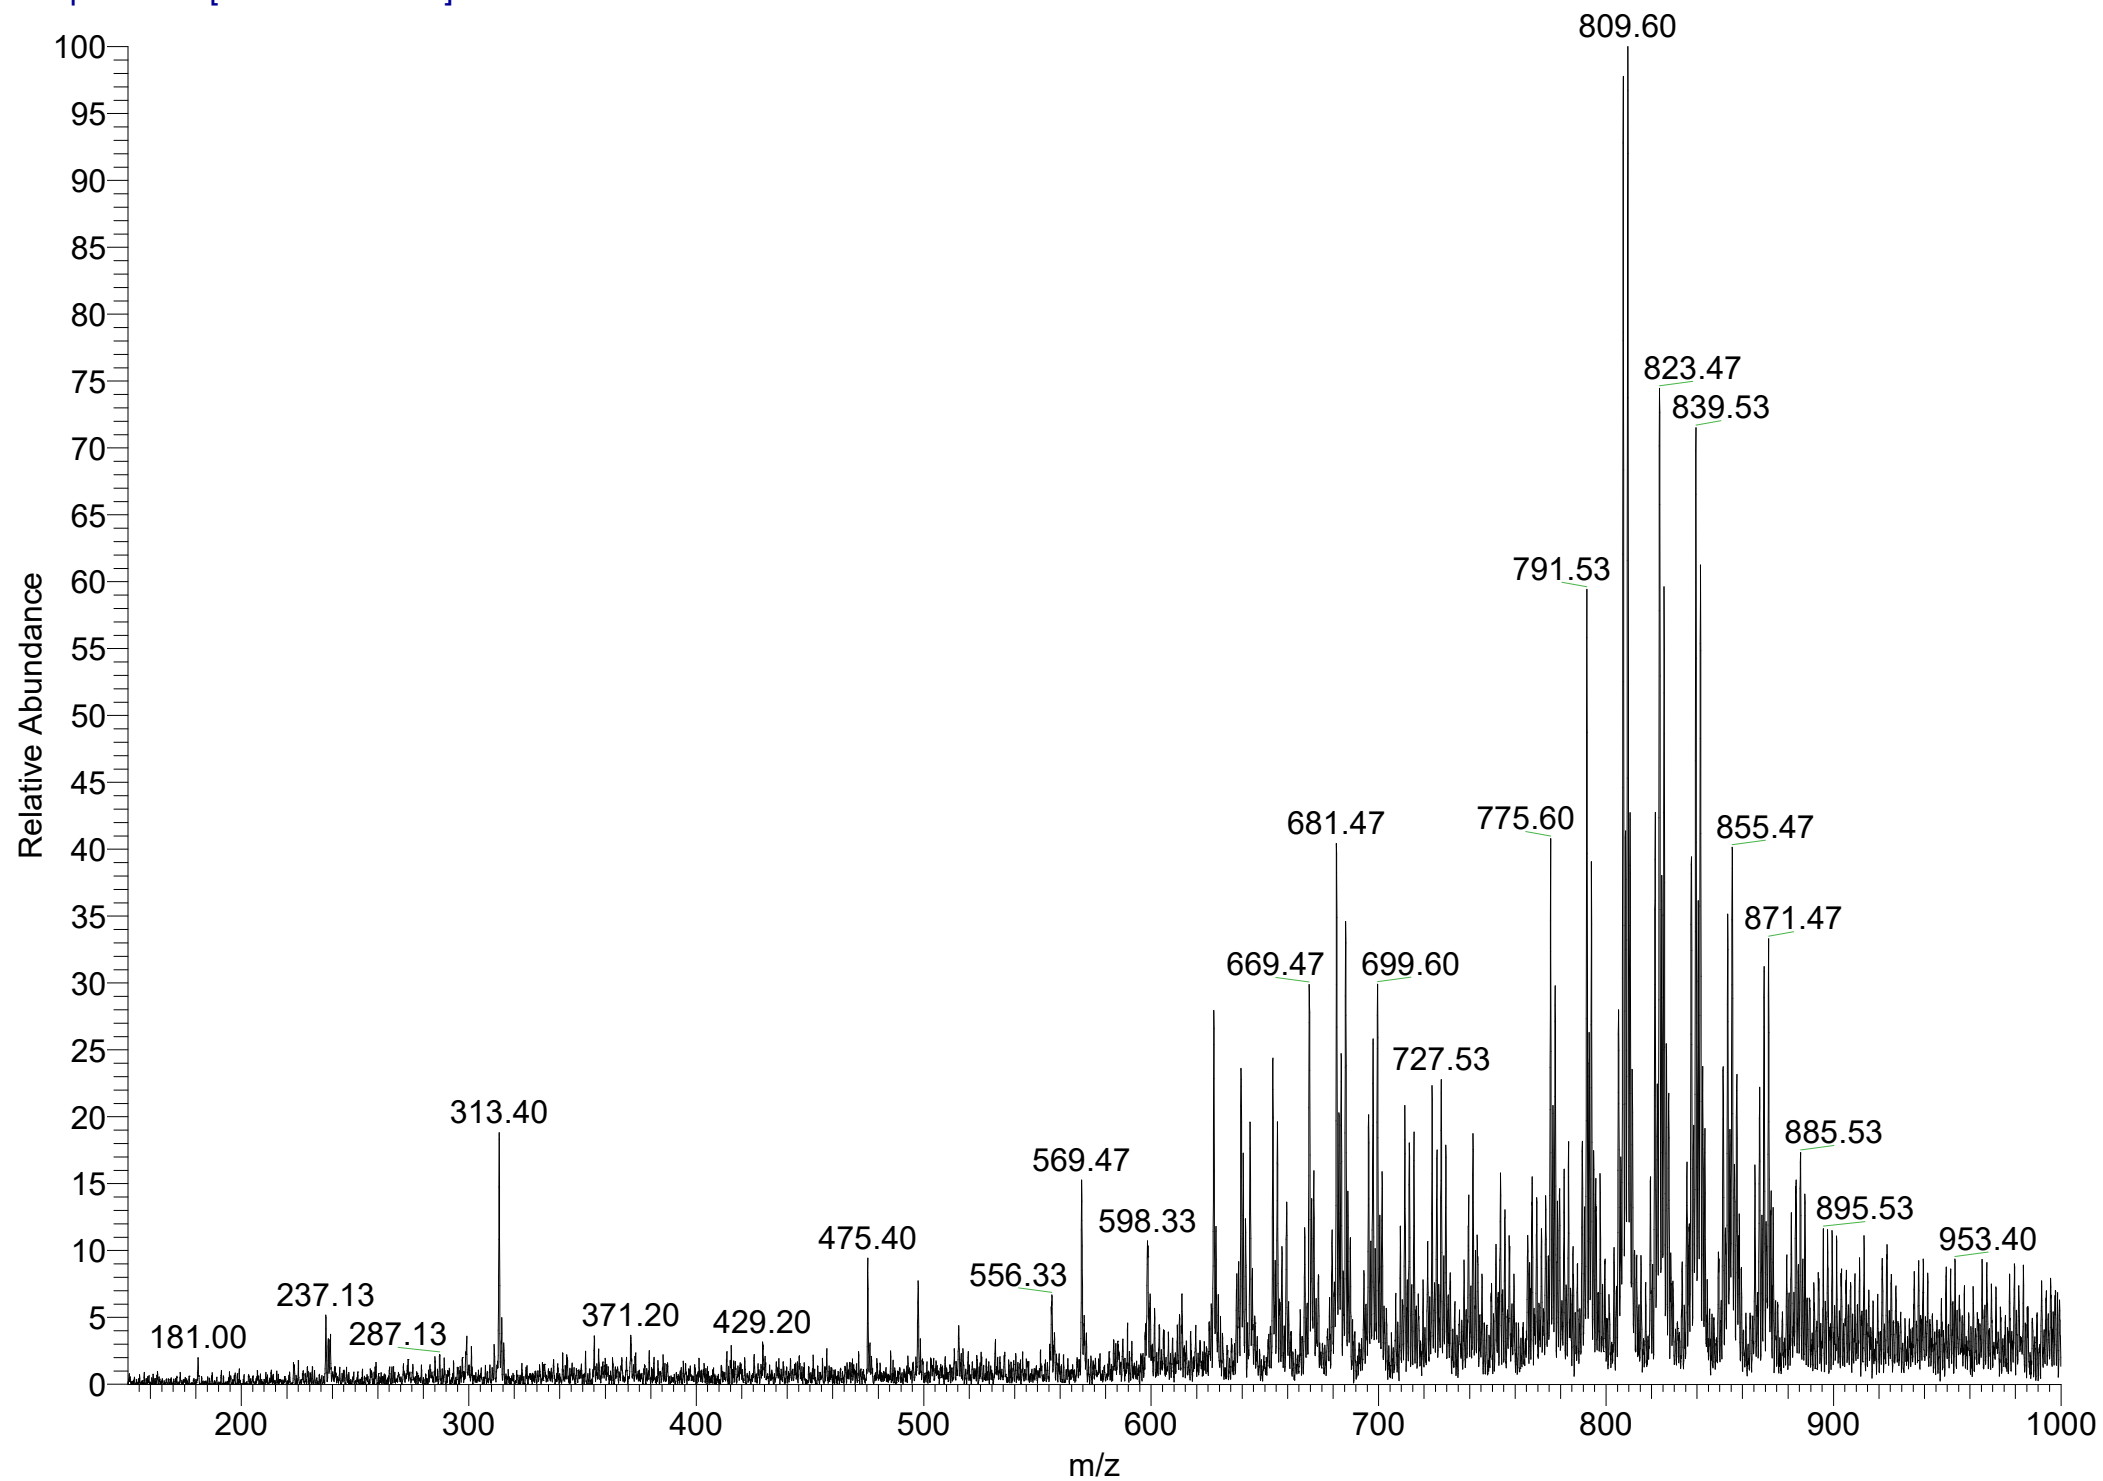



S11 #1-50 RT: 0.01-0.74 AV: 50 NL: 8.25E5

T: + p ESI ms [150.00-1000.00]

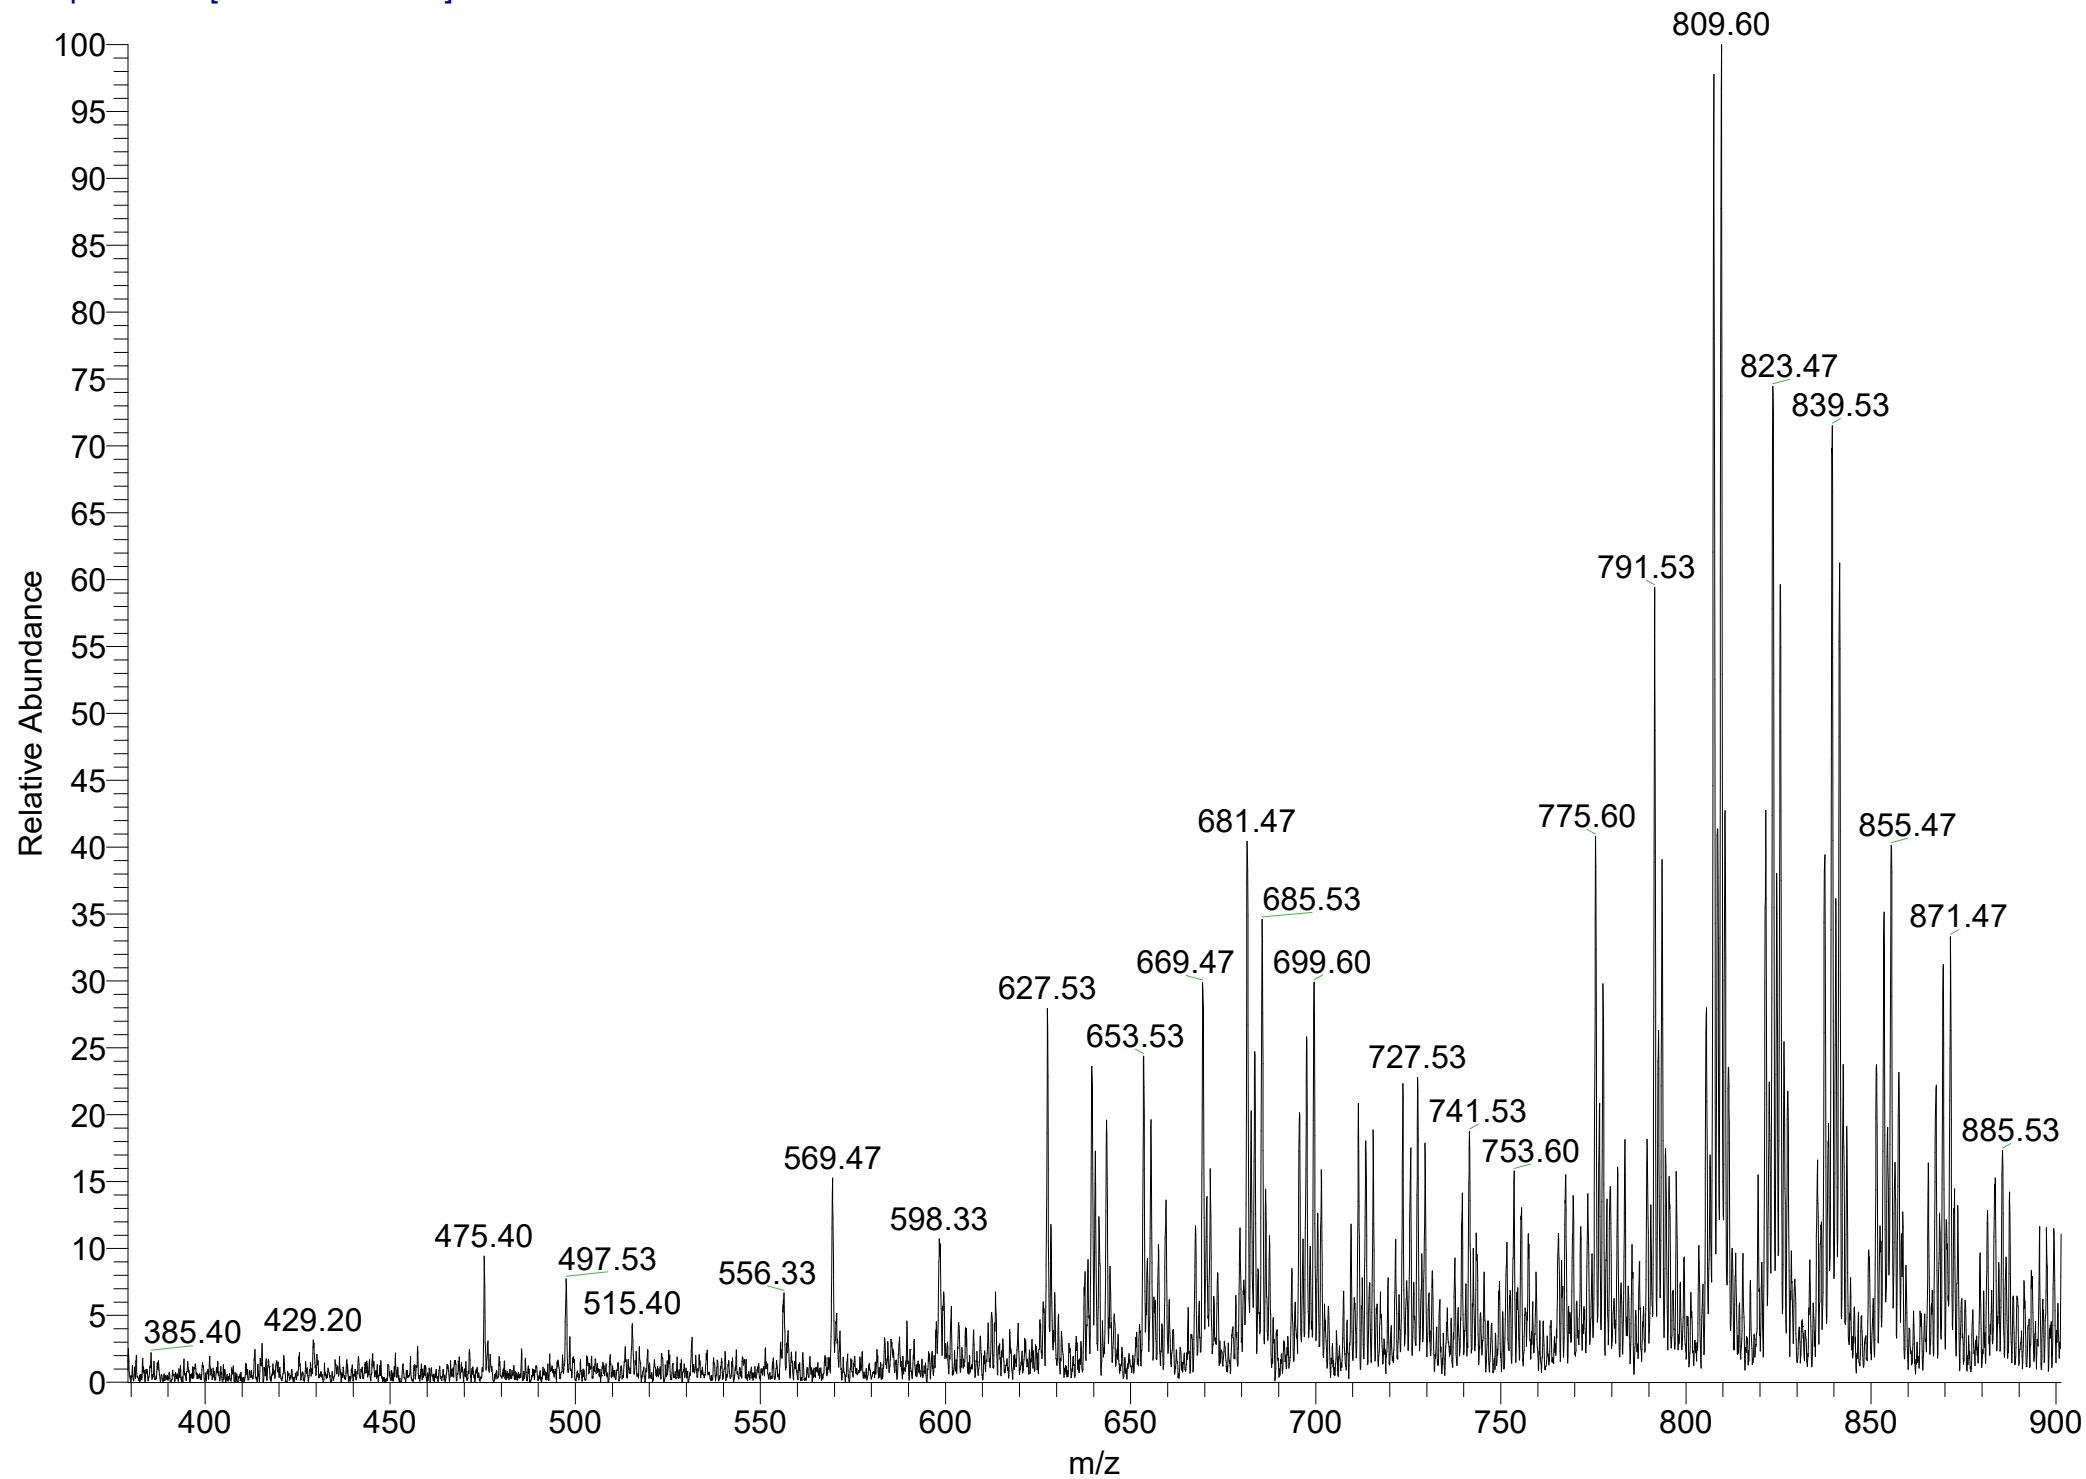

S12 #1-50 RT: 0.00-0.74 AV: 50 NL: 6.82E5

T: + p ESI ms [150.00-1000.00]

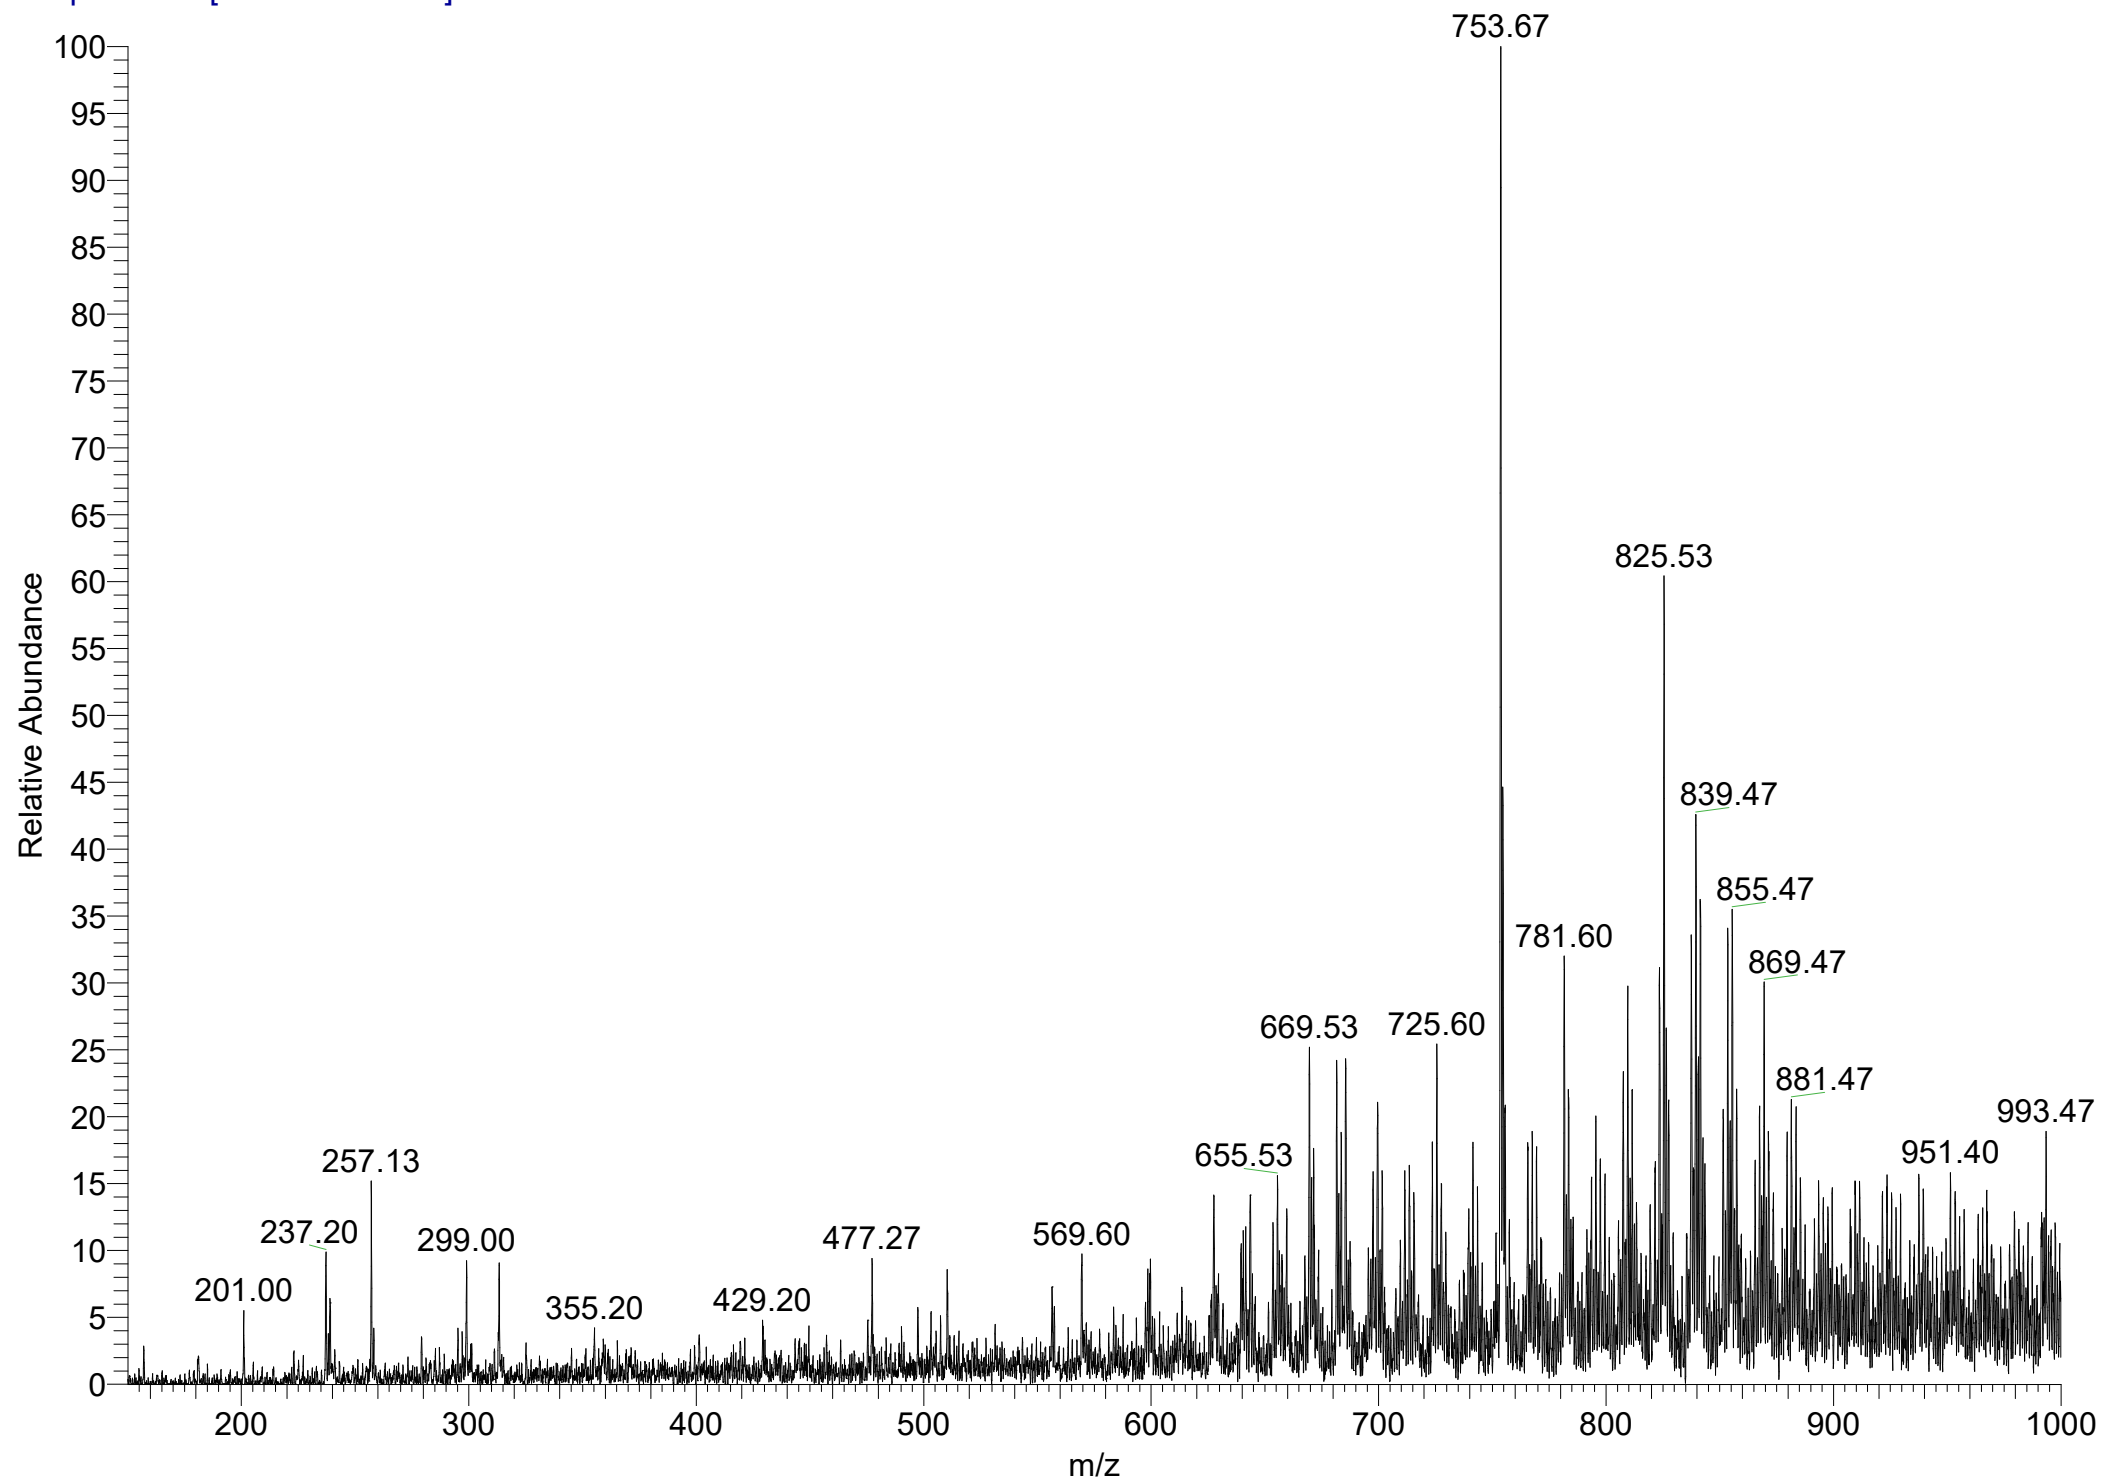

S12 #1-50 RT: 0.00-0.74 AV: 50 NL: 6.82E5

T: + p ESI ms [150.00-1000.00]

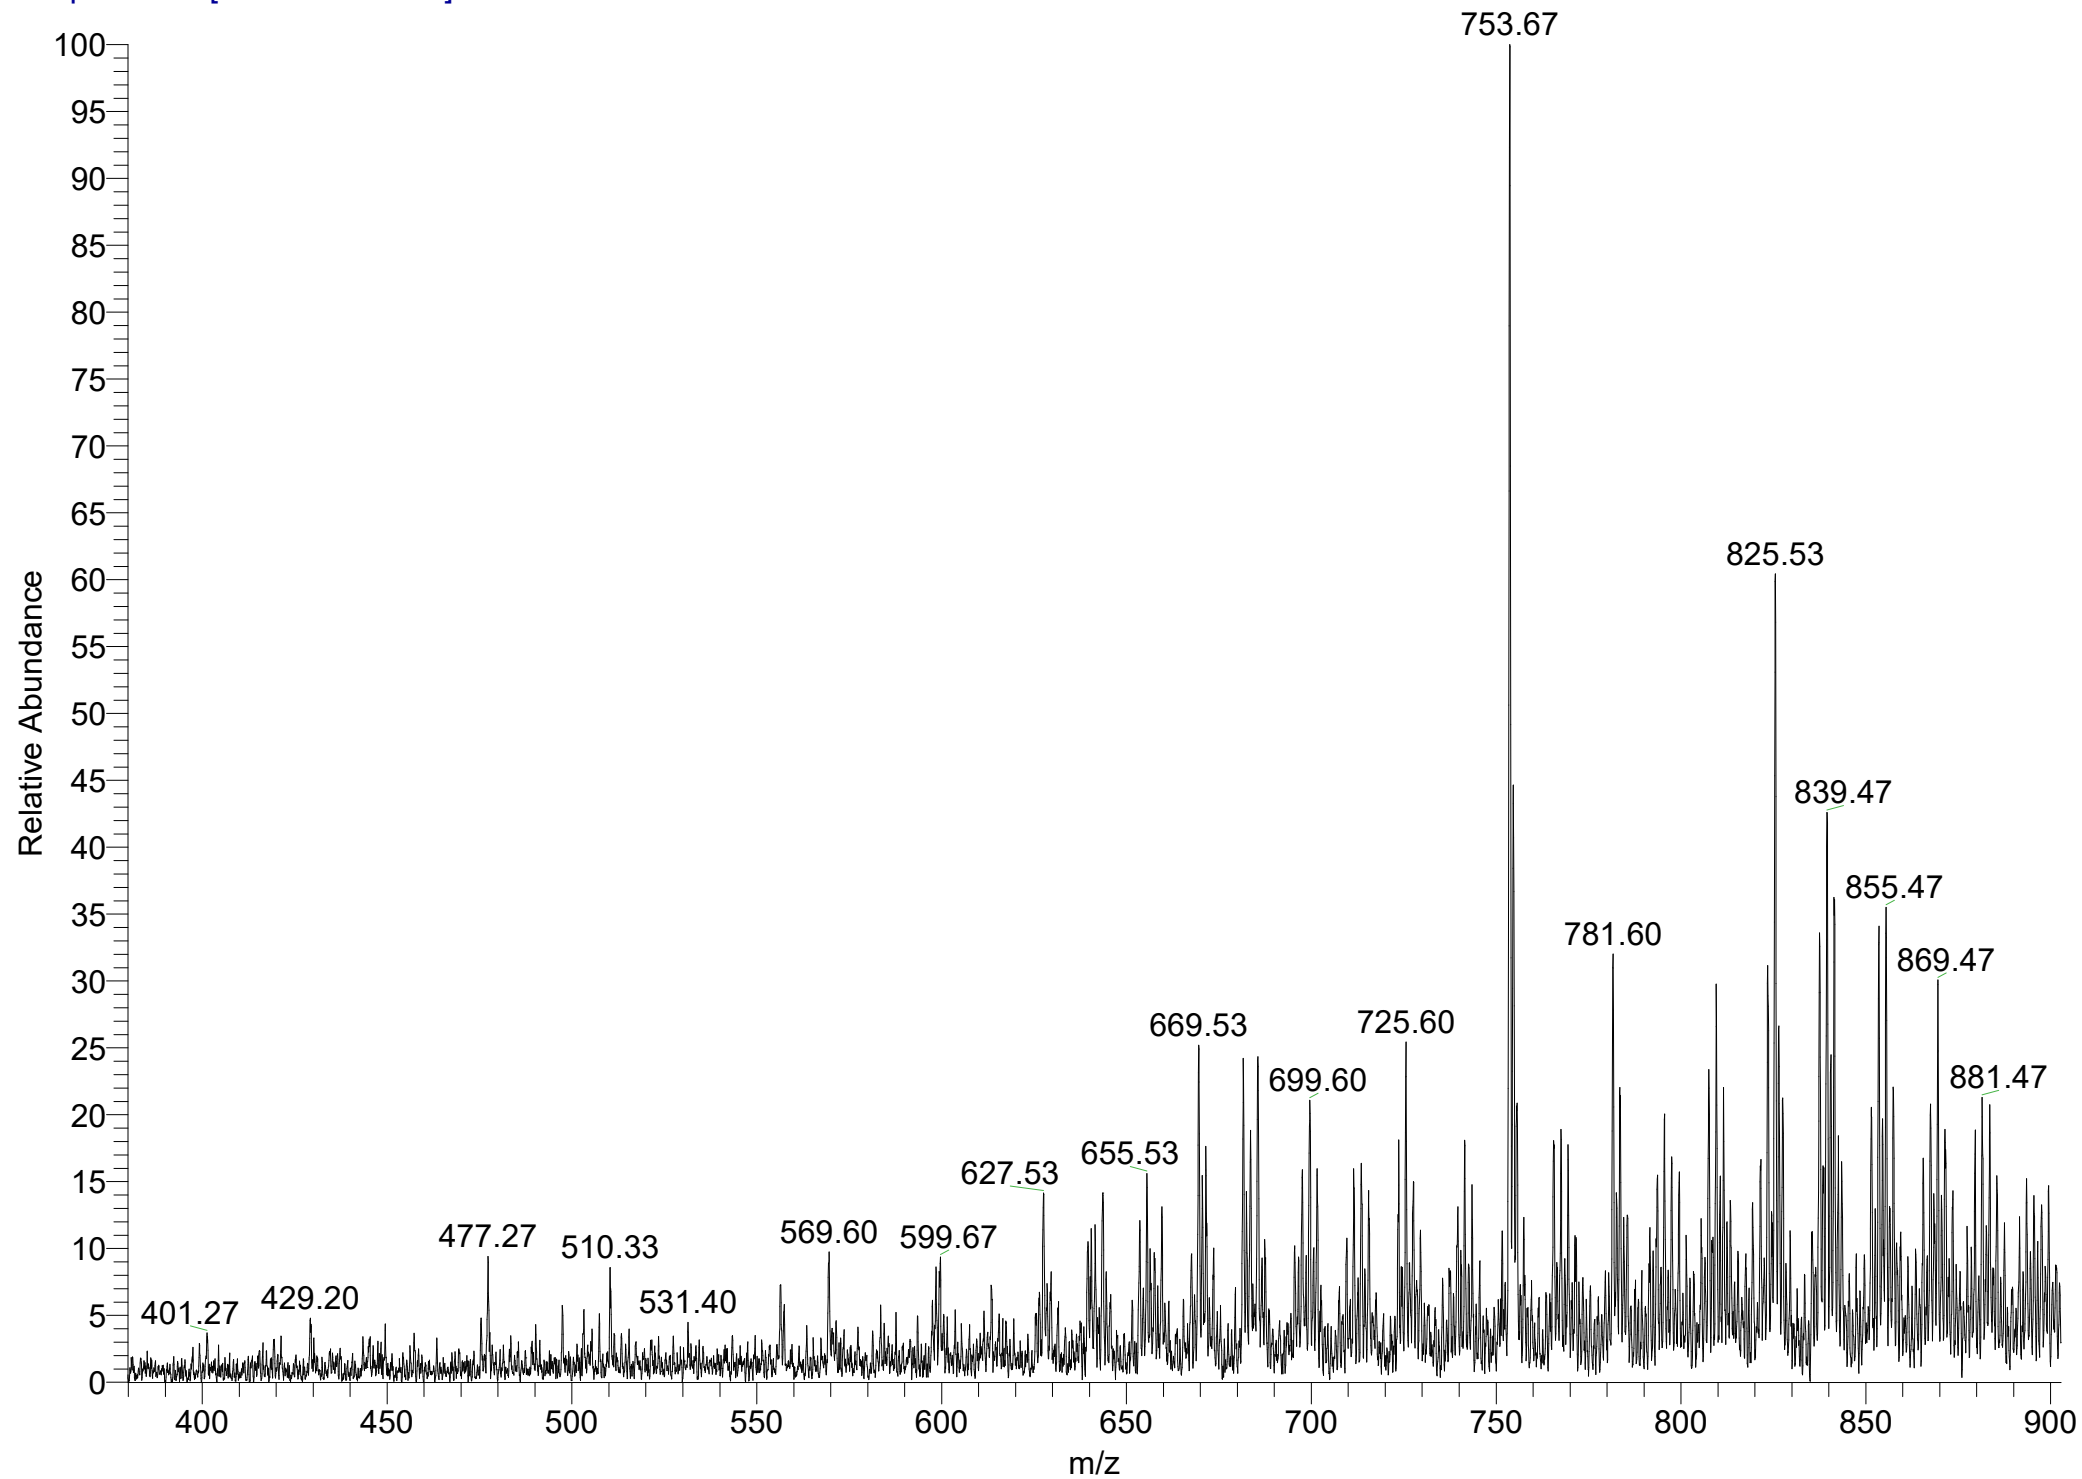

S13 #1-50 RT: 0.01-0.74 AV: 50 NL: 4.11E5

T: + p ESI ms [150.00-1000.00]

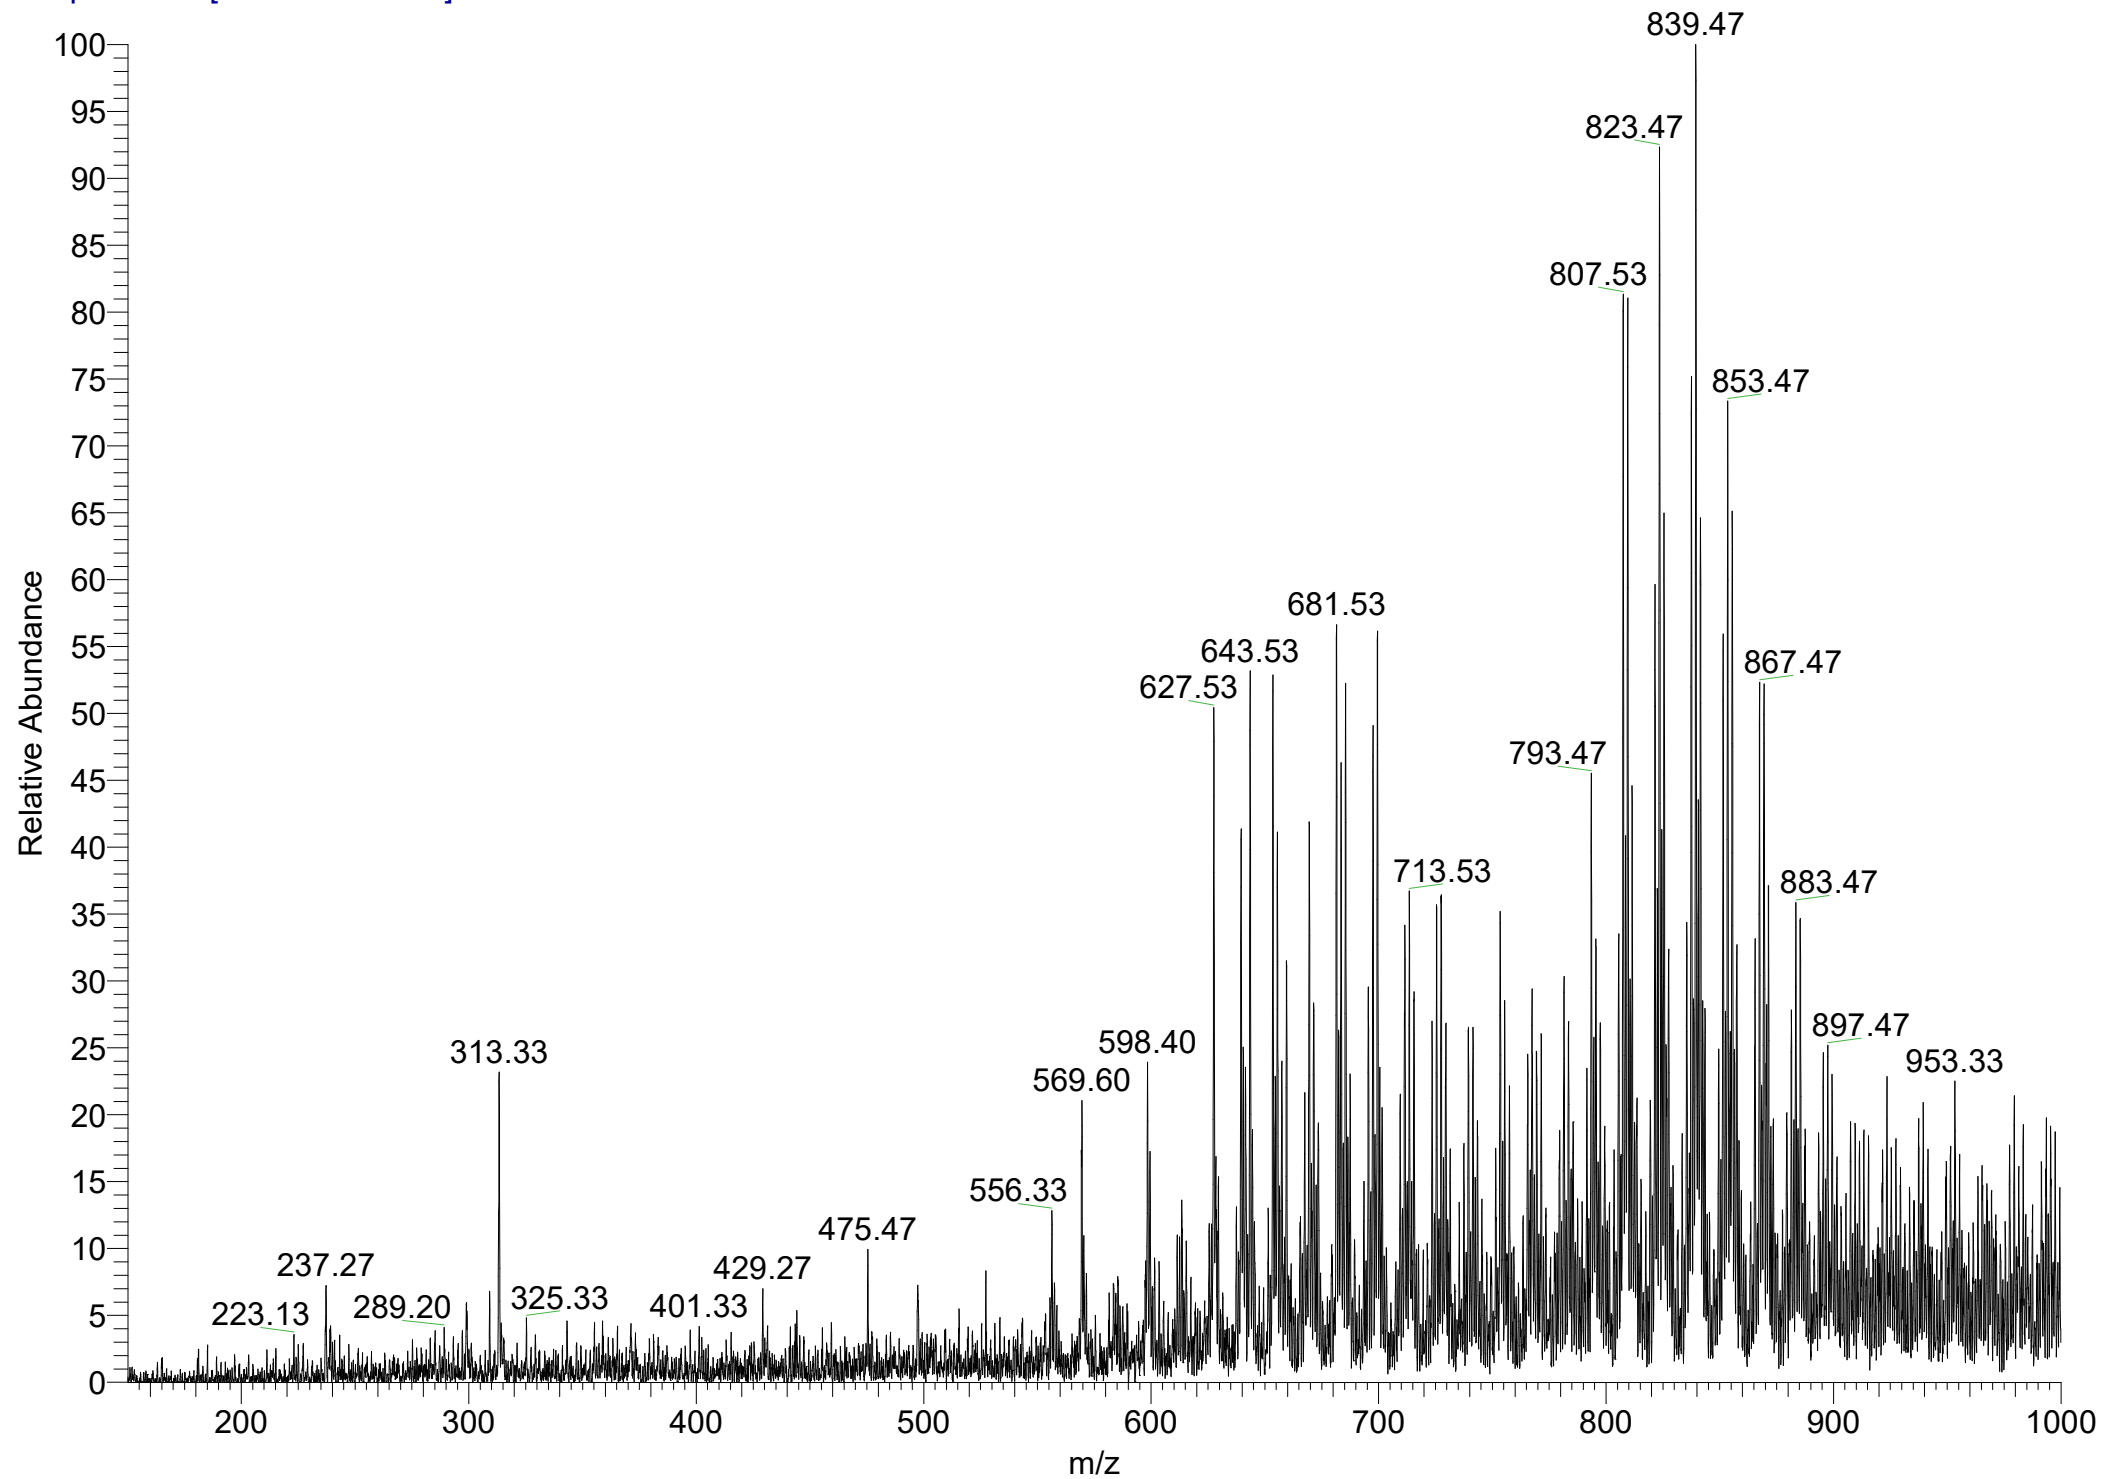

S13 #1-50 RT: 0.01-0.74 AV: 50 NL: 4.11E5

T: + p ESI ms [150.00-1000.00]

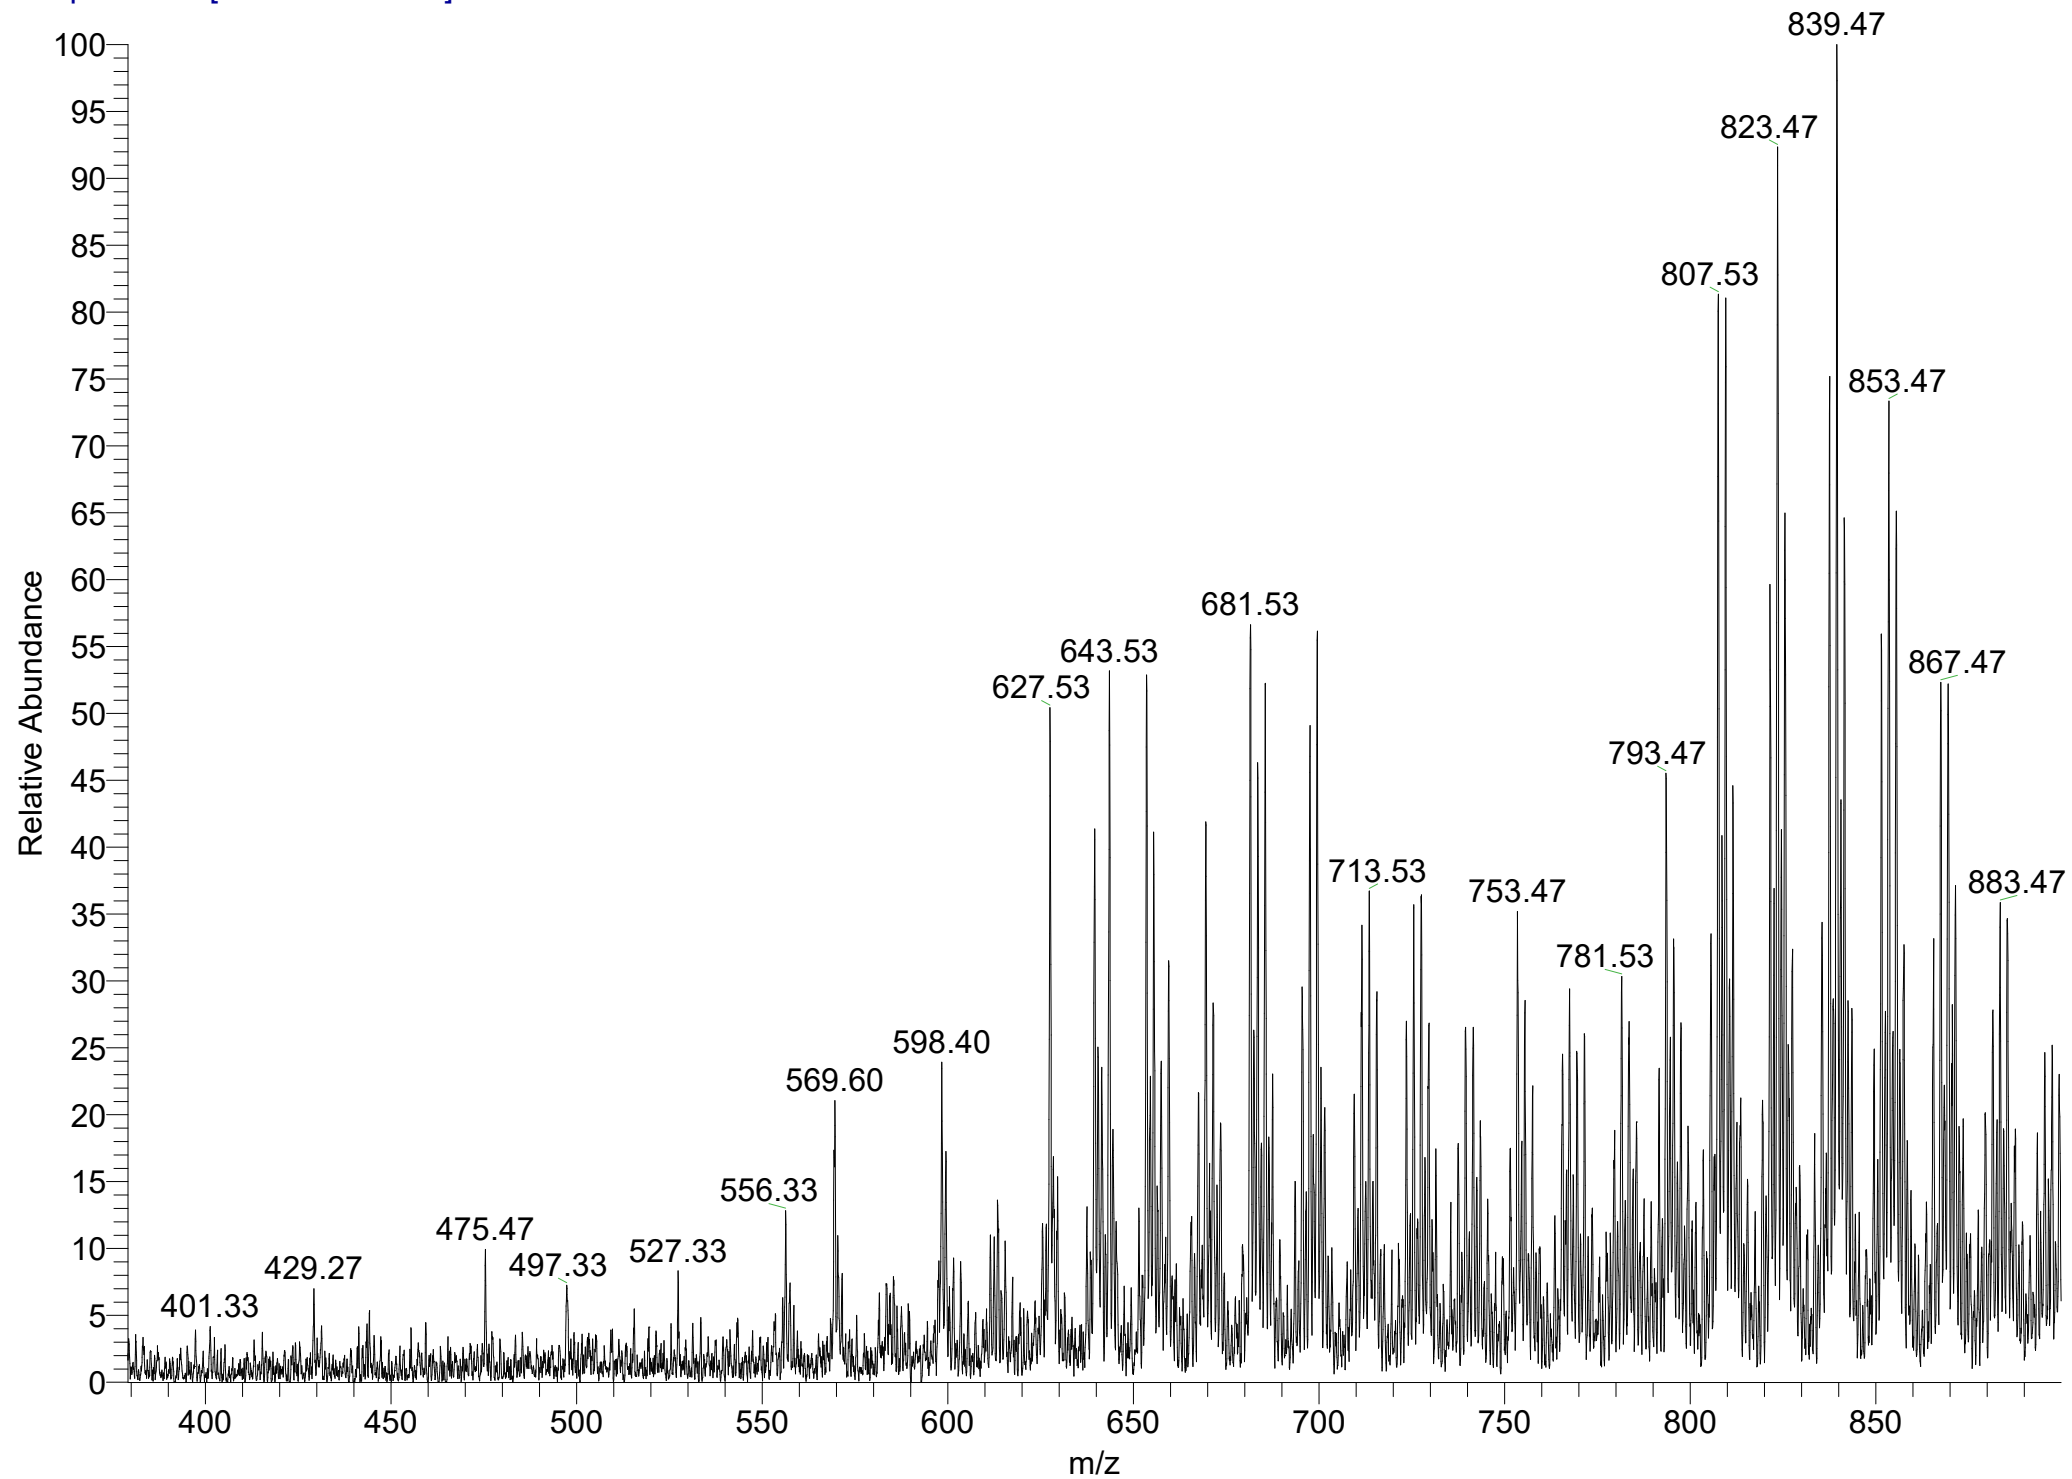

Supplement: s1 [file s1]
